# Supplementary material for: Identification of new components of the basal pole of Toxoplasma gondii provides novel insights into its molecular organization and functions
Source: Front Cell Infect Microbiol. 2022 Oct 13;12:1010038. doi: 10.3389/fcimb.2022.1010038 (PMC9613666; doi:10.3389/fcimb.2022.1010038)
Supplement: Supplementary file 2 [file Table_1.xlsx]

## Sheet: full-proteins
Accession	Description	Abundance Ratio: (MyoJ-1+ Biotin) / (KU+Biotin)	Abundance Ratio: (MyoJ-2+Biotin) / (KU+Biotin)	log2 (ratio S1)	log2 (ratio S2)	Name
TGGT1_275350	TBC domain-containing protein	1000	1000	9.96578	9.96578
TGGT1_245560	hypothetical protein	1000	1000	9.96578	9.96578				known basal pole protein
TGGT1_202550	NLI interacting factor family phosphatase	1000	1000	9.96578	9.96578	BCC6
TGGT1_269885B	rhoptry metalloprotease toxolysin TLN1	1000	1000	9.96578	9.96578				bait
TGGT1_288600	WD domain, G-beta repeat-containing protein	1000	1000	9.96578	9.96578
TGGT1_206300	hypothetical protein	1000	1000	9.96578	9.96578				IMC proteins
TGGT1_247260	hypothetical protein	1000	1000	9.96578	9.96578
TGGT1_252510	hypothetical protein	1000	1000	9.96578	9.96578				investigated candidates
TGGT1_300120	aminotransferase, class V superfamily protein	1000	1000	9.96578	9.96578
TGGT1_278975	ICE family protease (caspase) p20 domain-containing protein	1000	1000	9.96578	9.96578				ratio >2 or log2(ratio)>1
TGGT1_224530	alveolin domain containing intermediate filament IMC5	1000	1000	9.96578	9.96578	IMC5
TGGT1_244380	cactin	1000	1000	9.96578	9.96578
TGGT1_273050	hypothetical protein	1000	1000	9.96578	9.96578	BCC8
TGGT1_226220	alveolin domain containing intermediate filament IMC9	1000	1000	9.96578	9.96578	IMC9
TGGT1_224520	alveolin domain containing intermediate filament IMC8	1000	1000	9.96578	9.96578	IMC8
TGGT1_278130	hypothetical protein	1000	1000	9.96578	9.96578	BCC11
TGGT1_229280	hypothetical protein	1000	1000	9.96578	9.96578
TGGT1_218720	calcium-dependent protein kinase CDPK6	1000	1000	9.96578	9.96578	CDPK6
TGGT1_247770	hypothetical protein	1000	1000	9.96578	9.96578
TGGT1_223420	DnaJ domain-containing protein	1000	1000	9.96578	9.96578
TGGT1_313100	signal recognition particle SRP54 protein	1000	1000	9.96578	9.96578
TGGT1_226790	ABC transporter, ATP-binding domain-containing protein	1000	1000	9.96578	9.96578
TGGT1_215380	hypothetical protein	1000	1000	9.96578	9.96578	C1
TGGT1_209850	RNA recognition motif-containing protein	1000	1000	9.96578	9.96578
TGGT1_236850	hypothetical protein	1000	1000	9.96578	9.96578
TGGT1_261500	hydrolase	1000	1000	9.96578	9.96578
TGGT1_285220	CAP-Gly domain-containing protein	1000	1000	9.96578	9.96578
TGGT1_233010	putative cell-cycle-assocaited protein kinase ERK7	1000	1000	9.96578	9.96578	ERK7
TGGT1_219190	nuclear movement protein domain containing protein	1000	1000	9.96578	9.96578
TGGT1_231480	putative GCN1	1000	1000	9.96578	9.96578
TGGT1_250730	putative 60S ribosomal protein L7-B	1000	1000	9.96578	9.96578
TGGT1_221390	hypothetical protein	1000	1000	9.96578	9.96578
TGGT1_294640	ribonucleoside-diphosphate reductase large chain	1000	1000	9.96578	9.96578
TGGT1_227450	hydrolase, NUDIX family protein	1000	1000	9.96578	9.96578
TGGT1_264030	putative aminotransferase	1000	1000	9.96578	9.96578
TGGT1_202300	putative inosine triphosphate pyrophosphatase	1000	1000	9.96578	9.96578
TGGT1_206690	glideosome-associated protein with multiple-membrane spans GAPM2B	1000	1000	9.96578	9.96578	GAPM2B
TGGT1_254400	putative LSU ribosomal protein L2P	1000	1000	9.96578	9.96578
TGGT1_284620	hypothetical protein	1000	1000	9.96578	9.96578
TGGT1_270960	hypothetical protein	1000	1000	9.96578	9.96578
TGGT1_216900	cytokine induced apoptosis inhibitor 1 family protein	1000	1000	9.96578	9.96578
TGGT1_291820	RNA helicase (UPF2 interacting domain) protein	1000	1000	9.96578	9.96578
TGGT1_255880	hypothetical protein	1000	1000	9.96578	9.96578
TGGT1_244420	hypothetical protein	1000	1000	9.96578	9.96578
TGGT1_289540	hypothetical protein	1000	1000	9.96578	9.96578
TGGT1_259880	hypothetical protein	1000		9.96578
TGGT1_311680	FUN14 family protein	1000		9.96578
TGGT1_247790	VRR-NUC domain-containing protein	1000		9.96578
TGGT1_225260	DNA-directed RNA polymerase II RPB1	1000		9.96578
TGGT1_218358	zinc knuckle domain-containing protein	1000		9.96578
TGGT1_263470	ubiquitin carboxyl-terminal hydrolase UCHL3	1000		9.96578
TGGT1_258240	chromodomain helicase DNA binding protein CHD1/SWI2/SNF2	1000		9.96578
TGGT1_269410	hypothetical protein	1000		9.96578
TGGT1_267420	putative mago nashi family protein 2	1000		9.96578
TGGT1_275770	hypothetical protein	1000		9.96578
TGGT1_228750	calcium dependent protein kinase CDPK7	1000		9.96578
TGGT1_273070	putative GTPase activating protein for adp ribosylation factor	1000		9.96578
TGGT1_267800	dynamin-related protein DRPA	1000		9.96578
TGGT1_268990	hypothetical protein	1000		9.96578
TGGT1_289190	tetratricopeptide repeat-containing protein	1000		9.96578
TGGT1_290850	WD-40 repeat protein	1000		9.96578
TGGT1_238170	hypothetical protein	1000		9.96578
TGGT1_232720	putative Lsm12	1000		9.96578
TGGT1_225870	hypothetical protein	1000		9.96578
TGGT1_257470	myosin J	692.214	922.413	9.43507	9.84927	MyoJ
TGGT1_232780	hypothetical protein	269.313	619.714	8.07314	9.27546	BCC1
TGGT1_250340	centrin 2	75.8781	30.4822	6.24561	4.92989	CEN2
TGGT1_310440	membrane occupation and recognition nexus protein MORN1	74.3925	180.023	6.21709	7.49204	MORN1
TGGT1_233680	nuclear movement family protein	38.1233	46.6999	5.2526	5.54535
TGGT1_230340	hypothetical protein	27.7545	70.2862	4.79465	6.13517
TGGT1_268630	YagE family protein	27.4409	24.7306	4.77826	4.62822
TGGT1_269460	Ser/Thr phosphatase family protein	27.1903	86.4839	4.76502	6.43436	BCC5
TGGT1_209420	hypothetical protein	26.2389	20.2651	4.71363	4.34093	C2
TGGT1_311230	hypothetical protein	23.249	61.5712	4.5391	5.94418	BCC7
TGGT1_272640	putative eukaryotic initiation factor-2B, epsilon subunit	20.6371	25.203	4.36717	4.65553
TGGT1_293180	NADP-specific glutamate dehydrogenase	18.5855	22.2153	4.21611	4.47348
TGGT1_315920	DNA-directed RNA polymerase II RPB11A	17.8582	10.8582	4.15851	3.44072
TGGT1_310220	hypothetical protein	16.3637	26.89	4.03243	4.749	BCC10
TGGT1_260320	Noc2p family protein	16.0262	9.57664	4.00236	3.25952
TGGT1_231070	protein kinase	13.9667	36.9153	3.80392	5.20615	BCC2
TGGT1_216810	5'-nucleotidase, C-terminal domain-containing protein	13.8825	14.4446	3.79519	3.85246
TGGT1_205320	hypothetical protein	12.1525	16.8288	3.60318	4.07286
TGGT1_242830	putative XRN 5'-3' exonuclease	12.1417	9.11118	3.6019	3.18764
TGGT1_235340	hypothetical protein	11.0804	5.62664	3.46993	2.49227
TGGT1_214180	ENTH domain-containing protein	10.4825	6.64361	3.38991	2.73197
TGGT1_288800	endonuclease/exonuclease/phosphatase family protein	9.74349	10.0938	3.28444	3.3354
TGGT1_291180	hypothetical protein	9.59735	5.28723	3.26264	2.40251
TGGT1_232340	protein phosphatase 2C domain-containing protein	9.20426	4.43977	3.2023	2.15048
TGGT1_220270	alveolin domain containing intermediate filament IMC6	8.64549	6.33019	3.11195	2.66225	IMC6
TGGT1_296010	phosphatidylinositol 3- and 4-kinase	8.48876	8.02858	3.08555	3.00515
TGGT1_321620	dynamin-related protein DRPB	8.34692	8.00102	3.06124	3.00018
TGGT1_273905	hypothetical protein	8.03661	11.2988	3.00659	3.4981	C3
TGGT1_207060	ribonucleoside-diphosphate reductase small subunit	7.20831	5.98107	2.84966	2.5804
TGGT1_267500	hypothetical protein	6.98866	6.66039	2.80502	2.73561	CBAP/SIP
TGGT1_229650	josephin protein	6.7953	6.91722	2.76454	2.79019
TGGT1_283850	peptidyl-prolyl cis-trans isomerase	6.63622	9.52679	2.73036	3.25199
TGGT1_230210	alveolin domain containing intermediate filament IMC10	6.45052	4.21902	2.68942	2.07691	IMC10
TGGT1_205130	hypothetical protein	6.21358	8.60093	2.63542	3.10449
TGGT1_233720	DNA-directed RNA polymerase II RPBABC8	6.12186	4.70801	2.61397	2.23512
TGGT1_244840	zinc knuckle domain-containing protein	6.01138	17.2365	2.5877	4.10739
TGGT1_253470	alveolin domain containing intermediate filament IMC13	5.96002	8.55227	2.57532	3.09631	IMC13
TGGT1_313670	adaptin n terminal region domain-containing protein	5.00137	5.64367	2.32232	2.49663
TGGT1_313580	cytochrome b5 family heme/steroid binding domain-containing protein	4.95154		2.30788
TGGT1_230850	hypothetical protein	4.79018	5.56305	2.26008	2.47588
TGGT1_214270	putative translation initiation factor IF-2	4.66922	3.99429	2.22318	1.99794
TGGT1_260540	alveolin domain containing intermediate filament IMC14	4.64572	4.7847	2.2159	2.25843	IMC14
TGGT1_267050	hydrolase, alpha/beta fold family protein	4.4586	4.54264	2.15659	2.18353
TGGT1_289600	heat shock protein HSP29	4.43549	3.66351	2.14909	1.87323
TGGT1_262940	putative aspartyl proteinase (eimepsin)	3.87893	3.15772	1.95566	1.65888
TGGT1_238190	DNA-directed RNA polymerase II RPB3	3.76097	2.92616	1.91111	1.54901
TGGT1_203600	hypothetical protein	3.52357	1.71317	1.81704	0.776669
TGGT1_260600	Pumilio-family RNA binding repeat-containing protein	3.38355	3.21187	1.75854	1.68341
TGGT1_314100	tetratricopeptide repeat-containing protein	3.30114	4.5713	1.72296	2.1926
TGGT1_277260	hypothetical protein	3.21843	4.14704	1.68636	2.05208
TGGT1_233020	Not1 N-terminal domain, CCR4-Not complex component protein	3.19386	2.9413	1.6753	1.55646
TGGT1_277000	putative transport protein Sec24	3.09475	1.97582	1.62982	0.982454
TGGT1_231630	alveolin domain containing intermediate filament IMC4	3.09163	2.06401	1.62837	1.04545
TGGT1_280370	hypothetical protein	3.05992	2.58666	1.61349	1.37109
TGGT1_257350	putative eukaryotic translation initiation factor	3.03888	1.95881	1.60354	0.969975
TGGT1_231640	alveolin domain containing intermediate filament IMC1	3.01587	1.7696	1.59257	0.82342	IMC1
TGGT1_253440	putative cell-cycle-associated protein kinase SRPK	2.99976	0.796731	1.58485	-0.327835
TGGT1_200460	hypothetical protein	2.96427	3.6836	1.56768	1.88112
TGGT1_261520	putative nucleolar GTP-binding protein 1	2.95089	0.0946506	1.56115	-3.40124
TGGT1_269180	MIF4G domain-containing protein	2.9298	2.349	1.5508	1.23205
TGGT1_293360	hypothetical protein	2.91224		1.54213
TGGT1_225790	PDI family protein	2.83102	3.34175	1.50132	1.7406
TGGT1_216050	tetratricopeptide repeat-containing protein	2.81654	2.93564	1.49392	1.55367
TGGT1_216000	alveolin domain containing intermediate filament IMC3	2.80643	1.28718	1.48873	0.36421	IMC3
TGGT1_265830	phosphodiesterase/alkaline phosphatase D family protein	2.73477	2.66561	1.45142	1.41446
TGGT1_231850	serine-threonine phosophatase 2C (PP2C)	2.69959	0.652054	1.43274	-0.616936
TGGT1_312600	heat shock protein HSP21	2.66314	2.00975	1.41313	1.00702
TGGT1_289330	ubiquitin carboxyl-terminal hydrolase family 2 protein	2.61403	0.833125	1.38628	-0.263395
TGGT1_301120	acetyl-CoA acetyltransferase	2.60698	5.96263	1.38238	2.57595
TGGT1_310050	RNA recognition motif-containing protein	2.60036	0.665937	1.37871	-0.586543
TGGT1_226710	hypothetical protein	2.49742	1.08084	1.32044	0.112149
TGGT1_291140	CCR4-Not complex component, Not1 protein	2.48953	2.64307	1.31587	1.40221
TGGT1_221570	putative pre-rRNA-processing protein	2.4586	4.12892	1.29784	2.04576
TGGT1_270250	dense granule protein GRA1	2.39065	7.68157	1.2574	2.9414
TGGT1_231160	hypothetical protein	2.3721	1.90858	1.24616	0.932498
TGGT1_205380	fructose-bisphospatase I	2.32206	2.58335	1.2154	1.36924
TGGT1_263130	putative citrate synthase	2.2978	1.63297	1.20026	0.707499
TGGT1_258410	photosensitized INA-labeled protein PHIL1	2.25646	3.10244	1.17406	1.6334	PHIL1
TGGT1_239330	ribosomal protein RPL37	2.24138	0.416934	1.16439	-1.26211
TGGT1_230940	hypothetical protein	2.23793	2.47741	1.16216	1.30884
TGGT1_309760	hypothetical protein	2.23638	0.548677	1.16116	-0.865972
TGGT1_262640	Cg8 family protein	2.20496	2.48939	1.14075	1.31579
TGGT1_238050	nuclease and tudor domain-containing protein	2.20356	0.426261	1.13984	-1.23019
TGGT1_271970	glideosome-associated protein with multiple-membrane spans GAPM3	2.20227	2.23682	1.13899	1.16145	GAPM3
TGGT1_257290	RNA 2'-phosphotransferase, Tpt1/KptA family protein	2.19677	2.53167	1.13538	1.34009
TGGT1_242000	DUF51 family protein	2.15352		1.10669
TGGT1_222220	alveolin domain containing intermediate filament IMC7	2.1104	0.905661	1.07751	-0.142957	IMC7
TGGT1_256760	pyruvate kinase PyK1	2.05283	2.99167	1.03761	1.58095
TGGT1_254690	phospholipase/carboxylesterase	2.05243	0.336231	1.03733	-1.57247
TGGT1_214240	bromodomain-containing protein	2.03358	6.5581	1.02402	2.71328
TGGT1_219710	hypothetical protein	2.02237	0.937968	1.01604	-0.09239
TGGT1_315270	hypothetical protein	1.99709	1.11391	0.9979	0.155629
TGGT1_318710	ATP-binding cassette sub-family F member 1	1.98984	1.60098	0.99265	0.67896
TGGT1_313380	hypothetical protein	1.98705	1.10332	0.990629	0.14185	ILP1
TGGT1_219270	multi-pass transmembrane protein GAPM2a	1.98477	3.46859	0.98897	1.79435	GAPM2a
TGGT1_213900	regulator of chromosome condensation RCC1	1.98266	0.672116	0.987434	-0.573217
TGGT1_314430	serine/threonine specific protein phosphatase	1.97164	2.021	0.979398	1.01507
TGGT1_248700	alveolin domain containing intermediate filament IMC12	1.96248	1.00253	0.972679	0.00364994	IMC12
TGGT1_238010	ribosomal protein RPL23A	1.92369	0.624084	0.943876	-0.680187
TGGT1_278870	myosin F	1.91262	1.56025	0.935554	0.641773
TGGT1_251850	serine/threonine protein phosphatase	1.90746	4.25866	0.931649	2.0904	AC6
TGGT1_203390	CRAL/TRIO domain-containing protein	1.90524	3.01835	0.929975	1.59376
TGGT1_202620	hypothetical protein	1.90147	1.71874	0.927118	0.78135
TGGT1_205180	RNA recognition motif-containing protein	1.89292	0.194298	0.920615	-2.36365
TGGT1_244110	nucleosome assembly protein (nap) protein	1.88361	2.18888	0.9135	1.13019
TGGT1_218220	putative cell-cycle-associated protein kinase CDK	1.88075	2.10611	0.911308	1.07458
TGGT1_205350	putative integral membrane protein, GNS1/SUR4 family protein	1.87712	0.889548	0.908522	-0.168856
TGGT1_286580	hypothetical protein	1.8743	0.794875	0.906353	-0.331201
TGGT1_219590	RuvB family 1 protein	1.87019	1.59674	0.903183	0.675132
TGGT1_294360	putative ubiquitin specific protease 39 isoform 2	1.86897	2.57724	0.902241	1.36583
TGGT1_295360	hypothetical protein	1.86798	1.25675	0.901475	0.329702
TGGT1_216260	putative eukaryotic initiation factor-2B, gamma subunit	1.84379	1.89042	0.882676	0.918707
TGGT1_214840	AP2 domain transcription factor AP2X-7	1.83773	1.2017	0.877926	0.265073
TGGT1_270530	ubiquitin fusion degradation protein UFD1CY	1.83321	1.51854	0.874369	0.602683
TGGT1_312380	tetratricopeptide repeat-containing protein	1.82541	1.41651	0.868222	0.502345
TGGT1_202510	multi-pass transmembrane protein GAPM1B	1.7862	1.65485	0.836895	0.726697	GAPM1B
TGGT1_213830	putative Ufm1-conjugating enzyme 1	1.78543	1.44831	0.836274	0.534367
TGGT1_286750	MA3 domain-containing protein	1.78363	2.79184	0.834813	1.48121
TGGT1_212220	hypothetical protein	1.77663		0.829143
TGGT1_272910	T-complex protein 1 delta subunit	1.77407	1.80068	0.82706	0.848542
TGGT1_232660	Hsp70 interacting protein HIP	1.76924	0.546159	0.82313	-0.872607
TGGT1_259660	orotate phosphoribosyltransferase	1.75193	2.52731	0.808945	1.3376
TGGT1_231430	putative oligosaccharyl transferase stt3 protein	1.7407	1.05551	0.799664	0.077936
TGGT1_259630	hypothetical protein	1.72565	1.61752	0.787141	0.693782
TGGT1_257150	NOT2 / NOT3 / NOT5 family protein	1.72511	0.951527	0.786687	-0.0716841
TGGT1_242840	membrane protein	1.71205	1.72159	0.775722	0.783745
TGGT1_264040	hypothetical protein	1.70613	8.68402	0.770729	3.11836
TGGT1_294898	tetratricopeptide repeat-containing protein	1.69592	1.30608	0.762072	0.385238
TGGT1_266760	isocitrate dehydrogenase	1.68103	1.22136	0.749345	0.288485
TGGT1_203540	putative RNA binding protein	1.67044	0.911862	0.740226	-0.133112
TGGT1_229930	p25-alpha family protein	1.66845	1.26149	0.738505	0.335133
TGGT1_286530	hypothetical protein	1.6629	2.12595	0.733702	1.08811
TGGT1_218300	zinc finger (CCCH type) motif-containing protein	1.66117	0.54447	0.732202	-0.877075
TGGT1_232440	Brf1p family coiled coil protein	1.64681	1.31778	0.719671	0.398114
TGGT1_201380	putative chorismate synthase	1.64297	1.23121	0.71631	0.300074
TGGT1_231210	sarcalumenin/eps15 family protein	1.63239	1.4832	0.706982	0.56871
TGGT1_259830	diacylglycerol kinase catalytic domain-containing protein	1.63197	0.773896	0.706617	-0.369789
TGGT1_316340	hypothetical protein	1.62982		0.70471
TGGT1_271930	hypothetical protein	1.62724	1.13439	0.702427	0.181921
TGGT1_243710	t-complex protein beta subunit	1.62413	0.837244	0.699663	-0.25628
TGGT1_214790	glycoprotein	1.62019	0.973886	0.696161	-0.0381748
TGGT1_244310	GTP-binding protein	1.61728	1.80786	0.693566	0.854283
TGGT1_289380	hypothetical protein	1.61604	3.21833	0.69246	1.68631
TGGT1_240640	casein kinase I	1.60157	1.3658	0.679489	0.449746
TGGT1_266640	putative Acetyl-coenzyme A synthetase 2	1.59942	0.716979	0.677549	-0.479998
TGGT1_293730	DHHC zinc finger domain-containing protein	1.59322	1.77355	0.671943	0.826638	DHHC14
TGGT1_294630	hypothetical protein	1.58945	1.52803	0.668524	0.611671
TGGT1_239790	BRCA1 C Terminus (BRCT) domain-containing protein	1.58815	1.12654	0.667346	0.171897
TGGT1_242680	ribosomal protein RPL24e	1.58361	0.651442	0.663216	-0.618292
TGGT1_411760	actin	1.58279	1.22336	0.662468	0.290853
TGGT1_270270	hypothetical protein	1.57937	0.791009	0.65935	-0.338233
TGGT1_247015	hypothetical protein	1.56285		0.644183
TGGT1_258470	hypothetical protein	1.55942	1.16002	0.64101	0.214144
TGGT1_250820	hypothetical protein	1.55909	1.3847	0.640703	0.46957
TGGT1_219520	histone arginine methyltransferase PRMT1	1.54989	1.62354	0.632167	0.699143
TGGT1_269980	putative preprotein translocase Sec61	1.54281	1.46068	0.625561	0.546645
TGGT1_216040	putative 30S ribosomal protein S15	1.54142	0.448185	0.624258	-1.15784
TGGT1_410370	putative transmembrane protein	1.53984	0.158533	0.622779	-2.65715
TGGT1_271935	hypothetical protein	1.53865	0.809913	0.621667	-0.30416
TGGT1_410770	histone deacetylase SIR2-like protein	1.53302	0.579331	0.616379	-0.787539
TGGT1_220260	hypothetical protein	1.53035		0.613859
TGGT1_251600	putative IMP4 family U3 small nucleolar ribonucleoprotein (snoRNP)	1.51181	0.710249	0.596276	-0.493603
TGGT1_320570	putative elongation factor Tu	1.50901	0.58679	0.593599	-0.769084
TGGT1_315750	hypothetical protein	1.50524	1.21746	0.589993	0.283873
TGGT1_273060	putative ribosomal protein S17	1.49687	1.18968	0.58195	0.250579
TGGT1_202500	GAPM1a	1.49611	1.79085	0.581217	0.840648	GAPM1a
TGGT1_208030	microneme protein MIC4	1.49454	1.19884	0.579705	0.261643
TGGT1_236650	DEAD (Asp-Glu-Ala-Asp) box polypeptide 17	1.49063	1.73088	0.575921	0.791508
TGGT1_313860	regulator of chromosome condensation (RCC1) repeat-containing protein	1.49001	4.76128	0.575319	2.25135
TGGT1_269650	FFD and TFG box motifs protein	1.48635	0.448857	0.571778	-1.15567
TGGT1_313665	hypothetical protein	1.48395	1.69098	0.569447	0.757862
TGGT1_258210	DNA-directed RNA polymerase II RPB2	1.48255	0.963852	0.568085	-0.0531162
TGGT1_289650	PEP-carboxykinase I	1.47664	1.02096	0.562321	0.029921
TGGT1_211290	rhoptry protein ROP15	1.47367	0.131938	0.559409	-2.92207
TGGT1_249530	putative exportin 1	1.46516	1.70817	0.551058	0.772456
TGGT1_255190	myosin C	1.46288	1.2814	0.548808	0.35772	MyoC
TGGT1_236910	putative U2 snRNP auxiliary factor	1.45917		0.545143
TGGT1_321520	hypothetical protein	1.45743	0.670922	0.543428	-0.575783
TGGT1_313910	RNA recognition motif 2 protein	1.45702	1.70652	0.543024	0.77106
TGGT1_208340	hypothetical protein	1.45622	1.19803	0.54223	0.260668
TGGT1_209140	anti-silencing protein, ASF1 family protein	1.45002	0.607798	0.536069	-0.718337
TGGT1_214750	hypothetical protein	1.44988	1.40007	0.535932	0.485503
TGGT1_202760	hypothetical protein	1.44597	1.51852	0.53204	0.602666
TGGT1_305340	corepressor complex CRC230	1.4428	0.924144	0.528872	-0.11381
TGGT1_203630	ribosomal protein RPL44	1.4336	0.780301	0.519642	-0.357896
TGGT1_216560	methyltransferase domain-containing protein	1.43173	0.393945	0.517756	-1.34393
TGGT1_316900	Sas10 C-terminal domain-containing protein	1.43048		0.5165
TGGT1_305820	SGS domain-containing protein	1.43035	1.12093	0.516364	0.164693
TGGT1_213030	hypothetical protein	1.42924		0.515252
TGGT1_214090	signal peptidase	1.42672	1.51416	0.512697	0.598518
TGGT1_201700	WD domain, G-beta repeat-containing protein	1.41613	2.19623	0.501952	1.13503
TGGT1_312622	DUF803 domain-containing protein	1.41423	1.42321	0.500019	0.509144
TGGT1_260820	IMC sub-compartment protein ISP1	1.39965	0.471938	0.485061	-1.08333	ISP1
TGGT1_297720	trehalose-phosphatase	1.39828	1.19722	0.48365	0.259687
TGGT1_236950	hypothetical protein	1.39363	0.597979	0.478843	-0.741834
TGGT1_209100	PUB domain-containing protein	1.38911	0.920089	0.474158	-0.120154
TGGT1_248850	methionine aminopeptidase	1.38658	0.747906	0.471532	-0.419072
TGGT1_214320	facilitative glucose transporter GT1	1.38235	1.4855	0.467119	0.570953
TGGT1_273760	heat shock protein HSP70	1.38078	1.0796	0.465481	0.110499
TGGT1_310070	putative methyltransferase	1.38041	0.658994	0.465097	-0.601663
TGGT1_255320	mRNA turnover 4 (MRT4) family protein	1.37986	1.0142	0.464525	0.0203357
TGGT1_311400	WD domain, G-beta repeat-containing protein	1.3696	0.68669	0.453755	-0.542269
TGGT1_260370	AtPH1 family protein	1.36254	0.281966	0.446299	-1.82641
TGGT1_217680	hypothetical protein	1.36176	1.13471	0.445475	0.182323
TGGT1_219720	putative Ras-related protein Rab-5C	1.36127	1.28897	0.444948	0.36622
TGGT1_220860	DEAD/DEAH box helicase	1.35778	1.52492	0.441247	0.608735
TGGT1_310350	PGAP1 family protein	1.35101	1.51309	0.434044	0.597495
TGGT1_292950	hypothetical protein	1.34631	1.63583	0.429011	0.710022
TGGT1_240870	putative beta adaptin protein	1.34452	0.966366	0.427095	-0.0493578
TGGT1_320450	ribosome biogenesis regulatory protein (rrs1) protein	1.33979	0.533842	0.422008	-0.905514
TGGT1_294930	leucine rich repeat-containing protein	1.3392	1.22137	0.421373	0.288495
TGGT1_265370	hypothetical protein	1.33559	2.24311	0.417481	1.1655
TGGT1_202610	protein phosphatase 2C domain-containing protein	1.33314	1.07997	0.414833	0.110987
TGGT1_312570	CMGC kinase, MAPK family (ERK) MAPK-1	1.33218	1.7137	0.413789	0.777115
TGGT1_278720	hypothetical protein	1.32319	1.38186	0.404022	0.466617
TGGT1_272400	casein kinase ii regulatory subunit protein	1.32033	0.53792	0.400902	-0.894537
TGGT1_297430	hypothetical protein	1.31962	1.32823	0.400128	0.409503
TGGT1_205440	CCT chaperonin gamma subunit	1.31824	0.973941	0.398612	-0.0380936
TGGT1_306970	thymidylate kinase	1.30663	0.259401	0.385854	-1.94674
TGGT1_269200	putative crooked neck family 1 protein isoform 2	1.30591		0.385051
TGGT1_315570	hypothetical protein	1.30125		0.379898
TGGT1_247460	proliferating cell nuclear antigen PCNA1	1.29917	2.50721	0.377593	1.32609
TGGT1_216790	putative ATP-binding cassette sub-family E member 1	1.29601	1.61213	0.374078	0.688968
TGGT1_284560	ribosomal protein RPL9	1.29468	0.824827	0.372594	-0.277836
TGGT1_218730	hypothetical protein	1.29462		0.372529
TGGT1_308970	hypothetical protein	1.29188	0.484796	0.369471	-1.04455
TGGT1_219140	EF-1 guanine nucleotide exchange domain-containing protein	1.28965	0.558638	0.366975	-0.840015
TGGT1_225360	hypothetical protein	1.28912	1.2244	0.366381	0.292077
TGGT1_215400	RNA recognition motif-containing protein	1.28867	1.23708	0.365879	0.306943
TGGT1_217820	PCI domain-containing protein	1.28798	1.32997	0.365107	0.411397
TGGT1_221970	hypothetical protein	1.28282	1.42359	0.359322	0.509529
TGGT1_320020	transporter, major facilitator family protein	1.28234	1.75741	0.358781	0.813449
TGGT1_203240	hypothetical protein	1.28159	1.09694	0.35794	0.133482
TGGT1_243960	nuclear transport factor 2 (ntf2) domain-containing protein	1.28075	1.35327	0.356987	0.436446
TGGT1_201710	WD domain, G-beta repeat-containing protein	1.27899	0.0455503	0.355005	-4.4564
TGGT1_232520	brix domain-containing protein	1.27446		0.34989
TGGT1_218070	hypothetical protein	1.27269	0.312574	0.347884	-1.67773
TGGT1_215460	ribosomal protein RPS24	1.27155	2.23557	0.346589	1.16065
TGGT1_231970	pre-mRNA processing splicing factor PRP8	1.26689	0.780939	0.341294	-0.356717
TGGT1_231940	ThiF family protein	1.26095	1.04253	0.334509	0.0600834
TGGT1_267400	ribosomal protein RPL32	1.25995	2.12143	0.333366	1.08504
TGGT1_230420	sarco/endoplasmic reticulum Ca2+-ATPase	1.25783	1.44543	0.33094	0.531503
TGGT1_228360	putative peptidyl-prolyl isomerase FKBP12	1.25684		0.329804
TGGT1_258070	hypothetical protein	1.25646	1.08814	0.329369	0.121867
TGGT1_231150	hypothetical protein	1.25638	0.987234	0.32927	-0.0185358
TGGT1_213740	hypothetical protein	1.25626	1.32362	0.329138	0.404487
TGGT1_214430	hypothetical protein	1.25128	1.5004	0.323399	0.585343
TGGT1_239400	hypothetical protein	1.25084	1.1061	0.322895	0.145486
TGGT1_305520	ribosomal protein RPS2	1.2486	1.0646	0.320314	0.0903163
TGGT1_217510	hypothetical protein	1.24833	0.616648	0.320002	-0.697481
TGGT1_240810	hypothetical protein	1.24642	1.2568	0.317794	0.329752
TGGT1_220930	hypothetical protein	1.24603	1.20579	0.317337	0.269983
TGGT1_271178	hypothetical protein	1.24048		0.310894
TGGT1_233520	ATP-dependent RNA helicase	1.23863	1.37665	0.30875	0.461164
TGGT1_313240	putative ethylene-responsive RNA helicase	1.23694	1.05305	0.306771	0.0745776
TGGT1_205360	hypothetical protein	1.23662	0.464149	0.306404	-1.10734
TGGT1_276170	phosphatidylinositol 3- and 4-kinase	1.23605	1.33291	0.305739	0.414581
TGGT1_214210	rRNA pseudouridine synthase	1.23554	0.998865	0.305144	-0.00163869
TGGT1_314780	myosin G	1.23545	1.63906	0.305032	0.712867
TGGT1_312200	serine/threonine protein phosphatase	1.2341	0.99905	0.303463	-0.0013706
TGGT1_267810	Rab 5	1.22909	1.11657	0.297594	0.159079
TGGT1_231120	putative ribosomal protein S11	1.22812	0.917946	0.296455	-0.123519
TGGT1_280660	HECT-domain (ubiquitin-transferase) domain-containing protein	1.22732	1.59534	0.295509	0.673859
TGGT1_314480	hypothetical protein	1.22386		0.291442
TGGT1_231190	arsenite-activated ATPase family protein	1.22193	1.11859	0.289156	0.161677
TGGT1_290980	putative glycine C-acetyltransferase	1.22027	0.92987	0.2872	-0.104899
TGGT1_232710	ribosomal protein RPS3A	1.21718	1.49872	0.283543	0.58373
TGGT1_219200	DEAD/DEAH box RNA helicase family protein	1.21625	0.087166	0.28244	-3.52009
TGGT1_313010	DEAD (Asp-Glu-Ala-Asp) box polypeptide DDX6	1.21516	1.425	0.281148	0.510966
TGGT1_268200	RNA recognition motif-containing protein	1.21437	1.07303	0.280204	0.101692
TGGT1_228470	ribosomal protein RPL15	1.21432	1.96978	0.280149	0.978035
TGGT1_229470	hypothetical protein	1.21159	0.542966	0.276901	-0.881065
TGGT1_218600	RNA recognition motif-containing protein	1.21126		0.276507
TGGT1_230160	hypothetical protein	1.21117	1.08721	0.276402	0.120626
TGGT1_308860	hypothetical protein	1.2096	1.60154	0.274529	0.679462
TGGT1_294620	putative eukaryotic initiation factor-3, subunit 8	1.20779	1.96585	0.272372	0.97515
TGGT1_236140	hypothetical protein	1.20082		0.264017
TGGT1_313270	hypothetical protein	1.19962	1.04339	0.262575	0.0612807
TGGT1_248390	ribosomal protein RPL26	1.19913	1.64841	0.261985	0.721073
TGGT1_269800	putative glutamine-dependent NAD(+) synthetase protein	1.19424	0.750651	0.256092	-0.413787
TGGT1_244440	nucleoside transporter protein	1.19398	0.938578	0.255773	-0.0914516
TGGT1_268810	ck2 beta subunit	1.19139	1.12234	0.252646	0.166515
TGGT1_288860	RuvB family 2 protein	1.18961	1.71694	0.250488	0.779836
TGGT1_222410	hypothetical protein	1.1884	1.35095	0.249017	0.433969
TGGT1_311890	hypothetical protein	1.18834	1.03365	0.248943	0.0477461
TGGT1_310490	ribosomal protein RPL27A	1.18812	2.32618	0.248676	1.21796
TGGT1_314070	hypothetical protein	1.18798	1.37949	0.248515	0.464139
TGGT1_233890	hypothetical protein	1.18758	0.591012	0.248025	-0.758741
TGGT1_311770	hypothetical protein	1.18756	2.01773	0.247995	1.01273	BCC3
TGGT1_240740	Sec1 family protein	1.18577	0.323984	0.245821	-1.626
TGGT1_219770	putative 30S ribosomal protein S12	1.18551	0.37966	0.245503	-1.39722
TGGT1_214220	hypothetical protein	1.18536	1.80857	0.245323	0.854847
TGGT1_306670	hypothetical protein	1.18242	0.50823	0.241743	-0.976448
TGGT1_277500	putative 26S proteasome regulatory subunit 7	1.18191	1.23863	0.241121	0.308744
TGGT1_309600	hypothetical protein	1.17828	0.776521	0.236687	-0.364903
TGGT1_279380	hypothetical protein	1.17796	0.513206	0.236288	-0.962391
TGGT1_270640	RNA recognition motif-containing protein	1.17794	0.334936	0.236266	-1.57804
TGGT1_294670	translation initiation factor 3 subunit	1.17451	0.840966	0.232056	-0.249881
TGGT1_249630	glutathione S-transferase, N-terminal domain-containing protein	1.17284	0.688172	0.230003	-0.539159
TGGT1_226380	hypothetical protein	1.16981	0.344884	0.226273	-1.53582
TGGT1_202770	RNA recognition motif-containing protein	1.16972	0.630599	0.226163	-0.665206
TGGT1_257530	transporter, major facilitator family protein	1.1677	1.33334	0.223664	0.41504
TGGT1_240850	WD domain, G-beta repeat-containing protein	1.16577	0.749203	0.221279	-0.41657
TGGT1_289550	WD domain, G-beta repeat-containing protein	1.16498	0.112007	0.220311	-3.15834
TGGT1_203490	GNL3L/Grn1 GTPase	1.16344	1.26619	0.218392	0.340495
TGGT1_273370	putative coatomer gamma 2-subunit protein	1.16205	0.935294	0.216668	-0.0965074
TGGT1_212290	ribosomal protein RPS19	1.15921	0.669111	0.213146	-0.579683
TGGT1_287230	inorganic anion transporter, sulfate permease (SulP) family protein	1.15715	0.8594	0.210576	-0.218598
TGGT1_232180	UBA/TS-N domain-containing protein	1.15625	1.17414	0.20945	0.23161
TGGT1_237510	hypothetical protein	1.15433	0.528026	0.207057	-0.921318
TGGT1_277850	trypsin domain-containing protein	1.15302	0.312943	0.205423	-1.67603
TGGT1_249390	glutamate/leucine/phenylalanine/valine dehydrogenase family protein	1.15131	1.05093	0.203282	0.0716699
TGGT1_305120	transporter, solute:sodium symporter (SSS) family protein	1.14968	0.972935	0.201233	-0.0395849
TGGT1_313190	Rab18/RabC-family small GTPase	1.14959	0.718548	0.201119	-0.476843
TGGT1_263040	ribosomal protein RPS16	1.14882	0.399376	0.200158	-1.32418
TGGT1_229920	hypothetical protein	1.14848	1.78547	0.19972	0.836307
TGGT1_218560	acetyl-coA carboxylase ACC2	1.14789	0.303119	0.198984	-1.72205
TGGT1_232830	putative vacuolar proton translocating ATPase subunit A	1.14716	5.82797	0.198067	2.54299
TGGT1_204400	putative ATPase synthase subunit alpha	1.14344	1.04355	0.193382	0.0614962
TGGT1_313230	eukaryotic initiation factor-2, alpha subunit	1.14075	1.89538	0.189983	0.922487
TGGT1_309820	ribosomal protein RPL11	1.13894	0.862868	0.187693	-0.212788
TGGT1_288630	putative nucleosome assembly protein (NAP)	1.13849		0.18712
TGGT1_267080	putative 26S protease regulatory subunit 4	1.13322	1.07226	0.180422	0.100649
TGGT1_286770	hypothetical protein	1.13172	7.93784	0.178522	2.98875
TGGT1_209150	non-proton pumping type-II NADH dehydrogenase I	1.13068	1.70712	0.177192	0.771563
TGGT1_217890	putative alkyl hydroperoxide reductase/ Thiol specific antioxidant/ Mal allergen	1.12669	0.861316	0.172088	-0.215386
TGGT1_203780	hypothetical protein	1.12443		0.169197
TGGT1_321400	microsomal signal peptidase (spc12) domain-containing protein	1.12341		0.167883
TGGT1_312090	ribosomal protein RPL23	1.12252	0.866882	0.166743	-0.206093
TGGT1_297500	T-complex protein 1 eta subunit	1.12245	0.584765	0.166648	-0.774071
TGGT1_245680	ribosomal protein RPL21	1.12217	1.31799	0.166294	0.398344
TGGT1_227280	dense granule protein GRA3	1.12028	1.14566	0.163863	0.196185
TGGT1_213870	UBA/TS-N domain-containing protein	1.11971		0.16312
TGGT1_294350	DEAD/DEAH box helicase domain-containing protein	1.11786	0.358971	0.160741	-1.47806
TGGT1_213790	hypothetical protein	1.11731	1.05862	0.160024	0.0821835
TGGT1_232300	ribosomal protein RPS3	1.11645	1.17182	0.158922	0.228755
TGGT1_256090	glycerophosphodiester phosphodiesterase family protein	1.11543	0.787176	0.157595	-0.345242
TGGT1_229260	hypothetical protein	1.1149	0.920745	0.15691	-0.119126	BCC4
TGGT1_205540	DEAD/DEAH box helicase domain-containing protein	1.11414	0.244719	0.155928	-2.0308
TGGT1_222860	putative eukaryotic translation initiation factor	1.114	0.717659	0.155753	-0.478629
TGGT1_208540	DEAD/DEAH box helicase domain-containing protein	1.11072	1.33061	0.151501	0.412093
TGGT1_307810	hypothetical protein	1.11034	0.304292	0.151001	-1.71647
TGGT1_264060	PCI domain-containing protein	1.10881	1.12205	0.149018	0.166136
TGGT1_277700	putative ribosomal protein S14 precursor	1.10844	1.47671	0.148533	0.562385
TGGT1_225380	hypothetical protein	1.10839	0.731198	0.148462	-0.451667
TGGT1_288720	ribosomal protein RPL10	1.10741	1.06692	0.14719	0.093452
TGGT1_210690	ribosomal protein RPS6	1.10699	1.88982	0.146638	0.918247
TGGT1_207440	ribosomal protein RPS4	1.10657	0.913408	0.146097	-0.130669
TGGT1_249870	hypothetical protein	1.106	0.645285	0.145349	-0.631991
TGGT1_216020	peptidase family c78 protein	1.10525	1.24326	0.144377	0.31413
TGGT1_286630	redoxin domain-containing protein	1.1038	1.09348	0.142479	0.128925
TGGT1_289830	putative eukaryotic initiation factor-3, delta subunit	1.10274	1.09726	0.141088	0.133903
TGGT1_222000	brix domain-containing protein	1.10053	0.931111	0.138198	-0.102974
TGGT1_228170	inner membrane complex protein IMC2A	1.0988	0.841188	0.135932	-0.2495
TGGT1_251500	putative eukaryotic initiation factor-3, subunit 3	1.09704	1.38081	0.133617	0.465519
TGGT1_205710	lysine-tRNA ligase	1.09536	0.48281	0.131404	-1.05047
TGGT1_289680	Ras-related protein Rab11	1.09389	0.998278	0.129468	-0.00248716
TGGT1_263700	ribosomal protein RPS14	1.09357	1.22749	0.12905	0.295717
TGGT1_216670	FUSE-binding protein 2 / KH-type splicing regulatory protein	1.09352	0.402558	0.128984	-1.31273
TGGT1_229250A	ribosomal protein RPL28	1.09008	1.10367	0.124431	0.142312
TGGT1_224060	putative thioredoxin	1.08949	0.467191	0.123652	-1.09792
TGGT1_200290	rhomboid protease ROM1	1.08795	1.30706	0.121608	0.386325
TGGT1_226250	DEAD (Asp-Glu-Ala-Asp) box polypeptide DDX3X	1.08694	1.04119	0.120273	0.0582295
TGGT1_310670	putative glycogen phosphorylase 1	1.08669	0.213484	0.119935	-2.2278
TGGT1_298630	vacuolar transporter chaperone VTC2	1.08668	1.11956	0.119924	0.162936
TGGT1_258560	hypothetical protein	1.0866	0.719815	0.119817	-0.474302
TGGT1_311310	protein phosphatase 2B catalytic subunit, calcineurin family phosphatse superfamily protein	1.08231	1.08733	0.114115	0.120792
TGGT1_230350	hypothetical protein	1.08128	0.98704	0.112736	-0.0188202
TGGT1_294710	RNA recognition motif-containing protein	1.08116	0.263959	0.112582	-1.92162
TGGT1_311410	putative M phase phosphoprotein MPP10	1.0804		0.111562
TGGT1_297460	hypothetical protein	1.07913		0.109872
TGGT1_304740	rhoptry kinase family protein ROP35	1.07907	0.43384	0.109791	-1.20476
TGGT1_209600	hypothetical protein	1.07905	1.40483	0.109755	0.490394
TGGT1_215260	carbamoylphosphate synthetase	1.07902	0.801687	0.109715	-0.318889
TGGT1_273490	putative glutamine synthetase, type I	1.07849		0.109011
TGGT1_249950	Mak16 protein	1.07762	2.18737	0.107853	1.1292
TGGT1_224850	putative polyadenylate binding protein	1.0764	1.09743	0.10622	0.134127
TGGT1_231600	HEAT repeat-containing protein	1.07359	1.61968	0.102444	0.695707
TGGT1_291680	Sec23/Sec24 trunk domain-containing protein	1.07238	0.841259	0.100814	-0.249379
TGGT1_205558	NAC domain-containing protein	1.07234	0.167954	0.100769	-2.57386
TGGT1_265520	hypothetical protein	1.07217	1.92277	0.10053	0.943183
TGGT1_243570	ribosomal protein RPS26	1.07058	0.938961	0.0983946	-0.090863
TGGT1_216880	guanine nucleotide-binding protein	1.06979	0.321373	0.0973334	-1.63768
TGGT1_256770	putative eukaryotic translation initiation factor 4A, isoform 3	1.06872	1.21491	0.0958857	0.280851
TGGT1_271360	hypothetical protein	1.06751		0.0942527
TGGT1_292190	hypothetical protein	1.06624	0.454468	0.092536	-1.13775
TGGT1_222660	leucine rich repeat-containing protein	1.0653	1.3065	0.0912556	0.385706
TGGT1_306960	phenylalanine--tRNA ligase, beta subunit protein	1.06412	0.813332	0.0896596	-0.298083
TGGT1_277760	putative adenylosuccinate lyase	1.06385	0.800589	0.0892886	-0.320867
TGGT1_214770	putative small GTP binding protein rab1a	1.06276	0.72152	0.087822	-0.470889
TGGT1_262040	SAC3/GANP family protein	1.06013	0.840031	0.0842362	-0.251486
TGGT1_225550	phosphatidylserine decarboxylase	1.05816	0.891929	0.0815519	-0.164999
TGGT1_226580	hypothetical protein	1.05761	0.265166	0.0808064	-1.91503
TGGT1_226020	transporter, major facilitator family protein	1.05582	1.00089	0.0783695	0.00128978
TGGT1_260500	putative COPI associated protein	1.05431	0.569723	0.0762978	-0.811668
TGGT1_308930	putative 50S ribosomal protein L33	1.054	1.67118	0.075874	0.740869
TGGT1_309570	DEAD/DEAH box helicase domain-containing protein	1.05322	1.25686	0.0748017	0.329823
TGGT1_220950	hypothetical protein	1.05018	0.884632	0.0706341	-0.17685
TGGT1_235930	domain K- type RNA binding proteins family protein	1.04971	0.987797	0.0699851	-0.0177134
TGGT1_228210	26S proteasome regulatory subunit	1.04769	1.19941	0.0672168	0.262319
TGGT1_263430	3-hydroxyisobutyrate dehydrogenase	1.04725	0.549986	0.0666126	-0.862532
TGGT1_207460B	Rab5B protein	1.04712	0.908685	0.0664218	-0.138148
TGGT1_292130	ribosomal protein RPL13A	1.04601	2.24677	0.0649033	1.16785
TGGT1_233400	TAF9 RNA polymerase II, TATA box binding protein (TBP)-associated factor isoform 2 family protein	1.0457	1.11673	0.0644699	0.159282
TGGT1_275802	SRP72 RNA-binding domain-containing protein	1.04361	0.987359	0.0615773	-0.0183532
TGGT1_258870B	hypothetical protein	1.04323	0.393154	0.0610635	-1.34683
TGGT1_240650	putative coatomer protein complex, subunit alpha	1.04244	1.10416	0.0599599	0.142947
TGGT1_318440	helicase associated domain (ha2) protein	1.0421	0.71971	0.059499	-0.474513
TGGT1_222380	importin-beta N-terminal domain-containing protein	1.04071	1.34783	0.0575719	0.430637
TGGT1_240060	hypothetical protein	1.04018	0.427567	0.0568368	-1.22578
TGGT1_239100	ribosomal protein RPS7	1.03972	1.00444	0.0561981	0.00638753
TGGT1_202350	putative 50S ribosomal protein L21	1.03773	0.410301	0.0534245	-1.28525
TGGT1_258740	putative eukaryotic initiation factor-2A	1.03737	0.831362	0.052931	-0.266452
TGGT1_250770	putative eukaryotic initiation factor-4A	1.03629	1.70635	0.0514222	0.77091
TGGT1_249850	GAP40 protein	1.03448	1.14032	0.0489112	0.189434	GAP40
TGGT1_251480	DEAD/DEAH box helicase domain-containing protein	1.03435	0.627104	0.0487233	-0.673223
TGGT1_250810	ribosomal protein RPL35	1.03324	2.2755	0.047174	1.18619
TGGT1_238250	ribosomal protein RPL36	1.03316	0.983644	0.047066	-0.0237922
TGGT1_291800	ADP-ribosylation factor family protein	1.033	1.09435	0.0468364	0.130081
TGGT1_219280	actin like protein ALP1	1.03268	1.10001	0.0463882	0.137519
TGGT1_287500	putative T complex chaperonin	1.03264	0.888414	0.0463395	-0.170695
TGGT1_290200	NAD/NADP octopine/nopaline dehydrogenase, alpha-helical domain-containing protein	1.03096	0.95444	0.0439859	-0.0672731
TGGT1_300310	26S proteasome regulatory subunit, S6a family AAA ATpase	1.03033	0.575855	0.0431062	-0.796221
TGGT1_217460	glutaminyl-tRNA synthetase (GlnRS)	1.02996	0.993082	0.0425872	-0.0100154
TGGT1_212250	XPG N-terminal domain-containing protein	1.02965	1.25535	0.0421544	0.328091
TGGT1_227290	histone deacetylase HDAC3	1.02922	1.76825	0.0415516	0.822319
TGGT1_227360	ribosomal protein RPL3	1.02917	0.435704	0.0414828	-1.19858
TGGT1_223410	putative eukaryotic initiation factor-4E	1.02883	0.965824	0.0409991	-0.0501682
TGGT1_228000	putative splicing factor 3A subunit 2	1.02869		0.0408106
TGGT1_268570	zinc finger (CCCH type) motif-containing protein	1.02852	0.317971	0.0405746	-1.65303
TGGT1_229140	MaoC family domain-containing protein	1.02739	1.01917	0.038981	0.0273883
TGGT1_215470	ribosomal protein RPL10A	1.02657	1.18845	0.0378366	0.249084
TGGT1_292920	putative heat shock protein 75	1.02653	0.948582	0.0377749	-0.0761555
TGGT1_236050	putative fructose-bisphosphate aldolase	1.02614	1.28985	0.0372291	0.367198
TGGT1_260610	methyltransferase	1.02478	1.19762	0.0353153	0.260165
TGGT1_249250	ribosomal protein RPL35A	1.02411	1.29827	0.0343707	0.376595
TGGT1_213350	ribosomal protein RPS15	1.02389	1.73395	0.0340568	0.79406
TGGT1_248460	putative ubiquitin	1.02384	0.528895	0.0339936	-0.918947
TGGT1_226970	ribosomal protein RPS11	1.02303	1.18735	0.0328495	0.24775
TGGT1_248670	V-type H(+)-translocating pyrophosphatase VP1	1.02289	2.60648	0.0326563	1.3821
TGGT1_299050	ribosomal protein RPL17	1.02223	1.66122	0.0317236	0.732247
TGGT1_232730	acyl-CoA:diacylglycerol acyltransferase 1-related enzyme	1.02221	1.08813	0.0316964	0.121848
TGGT1_201680	putative eukaryotic initiation factor-3 subunit 10	1.02205	1.15578	0.0314692	0.208866
TGGT1_290910	hypothetical protein	1.02092	1.628	0.0298731	0.703105
TGGT1_204020	ribosomal protein RPL8	1.01964	1.32735	0.0280613	0.408551
TGGT1_277970	dolichol-phosphate-mannose synthase family protein	1.01921	1.22111	0.0274452	0.288198
TGGT1_300000	ribosomal protein RPL18	1.01911	1.76155	0.0273125	0.816843
TGGT1_271280	putative 60S ribosome subunit biogenesis protein NIP7	1.01907	0.832608	0.0272492	-0.26429
TGGT1_245460	ribosomal protein RPS8	1.01865	1.17906	0.0266596	0.237638
TGGT1_274190	putative eukaryotic initiation factor 2B epsilon subunit	1.01778	1.07558	0.02543	0.105112
TGGT1_213910	hypothetical protein	1.01774	0.923464	0.0253646	-0.114872
TGGT1_237150	putative minor histocompatibility antigen h13	1.01708	0.783761	0.0244384	-0.351515
TGGT1_312480	putative uracil phosphoribosyltransferase FUR1	1.01648	1.55978	0.0235792	0.64134
TGGT1_289560	RNA recognition motif-containing protein	1.01638	1.59984	0.0234459	0.677924
TGGT1_293310	putative ribosomal protein L20	1.01609	0.194324	0.0230249	-2.36346
TGGT1_289970	hypothetical protein	1.01603	0.737535	0.0229375	-0.439217
TGGT1_216510	putative thioredoxin	1.01568	1.13513	0.0224516	0.182851
TGGT1_309120	ribosomal protein RPL4	1.01431	1.22658	0.0204927	0.294644
TGGT1_247440	hypothetical protein	1.01321	0.558832	0.0189312	-0.839514
TGGT1_308920	splicing factor U2AF protein	1.01318		0.0188853
TGGT1_223540	importin-beta N-terminal domain-containing protein	1.0129	1.68475	0.0184917	0.752534
TGGT1_287180	hypothetical protein	1.01287	0.57943	0.0184531	-0.787294
TGGT1_218540	putative peptidase S15	1.01223	0.667578	0.0175312	-0.582992
TGGT1_289530	ribosomal protein RPL19	1.01065	1.15194	0.0152817	0.204067
TGGT1_217650	hypothetical protein	1.0105	0.549359	0.0150717	-0.864178
TGGT1_242030	hypothetical protein	1.00992	1.08508	0.0142385	0.117807
TGGT1_271888	putative 3-ketoacyl-CoA reductase	1.00923	1.29254	0.0132544	0.370205
TGGT1_223855	RNA recognition motif-containing protein	1.00811	0.123268	0.0116538	-3.02013
TGGT1_207990	ribosomal RNA large subunit methyltransferase J protein	1.00635	0.287203	0.00912993	-1.79986
TGGT1_269920	phosphatidylserine decarboxylase	1.00558	0.831897	0.00803056	-0.265523
TGGT1_236040	fructose-1,6-bisphosphate aldolase	1.00508	1.23919	0.00730741	0.309402
TGGT1_310150	AMP-binding enzyme domain-containing protein	1.0044		0.00633038
TGGT1_217570	ribosomal protein RPS27	1.0037	0.828129	0.00532584	-0.272073
TGGT1_256000	endoplasmic reticulum retention receptor	1.00236	0.700273	0.00339501	-0.514012
TGGT1_273460	eukaryotic translation initiation factor 3 subunit 6 interacting protein	1.00104	1.06637	0.00150187	0.0927148
TGGT1_300190	ribosomal protein RPL37A	0.999321	0.82101	-0.000980282	-0.284529
TGGT1_225050	putative adenosylhomocysteinase	0.998845	0.536529	-0.00166679	-0.898272
TGGT1_252630	hypothetical protein	0.998303	1.18117	-0.0024506	0.240211
TGGT1_231140	ribosomal protein RPS25	0.996035	0.849734	-0.00573163	-0.234917
TGGT1_259550	dihydropteroate synthase	0.995054	0.362826	-0.00715255	-1.46265
TGGT1_240570	hypothetical protein	0.994236	0.353312	-0.00833926	-1.50099
TGGT1_277690	hypothetical protein	0.994228	1.14372	-0.00835175	0.193728
TGGT1_408800	NTPase	0.993961	0.991781	-0.00873892	-0.0119065
TGGT1_234610	WD-40 repeat protein	0.993494	0.18009	-0.00941639	-2.47321
TGGT1_261570	ribosomal protein RPL7A	0.993375	1.40539	-0.0095897	0.490968
TGGT1_248250	putative translation initiation factor IF-2	0.992919	0.257849	-0.0102517	-1.9554
TGGT1_254880	Alpha-galactosidase	0.991237	1.00121	-0.0126975	0.00173746
TGGT1_266060	ribosomal protein RPSA	0.988815	1.29522	-0.0162271	0.373202
TGGT1_250830	SAC3/GANP family protein	0.98879	1.07891	-0.0162637	0.109578
TGGT1_268740	hypothetical protein	0.987667		-0.017903
TGGT1_205470	putative translation elongation factor 2 family protein	0.985957	0.549497	-0.0204027	-0.863816
TGGT1_229670	ribosomal protein RPS23	0.985096	3.0483	-0.0216637	1.60801
TGGT1_221380	alba 1	0.984935	1.01896	-0.0218998	0.0270989
TGGT1_209720	hypothetical protein	0.984306	0.79568	-0.0228208	-0.32974
TGGT1_215220	hypothetical protein	0.98417	0.35788	-0.0230203	-1.48245
TGGT1_262670	ribosomal protein RPL18A	0.983855	1.21326	-0.0234823	0.278888
TGGT1_248880	GTPase RAB7	0.98368	0.878935	-0.0237388	-0.186171
TGGT1_227030	hypothetical protein	0.983258	1.46353	-0.0243577	0.549448
TGGT1_308090	rhoptry protein ROP5	0.982319	1.00109	-0.0257364	0.00156876
TGGT1_263060	Proteasome/cyclosome repeat-containing protein	0.982219	0.813568	-0.025883	-0.297664
TGGT1_262710	Ctr copper transporter family protein	0.981648	1.20915	-0.0267222	0.273991
TGGT1_290700	hypothetical protein	0.981614	0.875065	-0.0267726	-0.192538
TGGT1_306600	RNA recognition motif-containing protein	0.980964	0.391538	-0.027728	-1.35278
TGGT1_253430	putative asparagine synthetase	0.980594	1.24838	-0.0282717	0.32006
TGGT1_203380	DnaJ domain-containing protein	0.980276	1.08674	-0.0287402	0.120011
TGGT1_242400	calcium-dependent protein kinase CDPK2B	0.98021	0.55598	-0.0288378	-0.846894
TGGT1_249650	putative apolipoprotein A-I binding protein	0.979837		-0.0293868
TGGT1_315770	cytochrome p450 superfamily protein	0.978278	0.349476	-0.0316837	-1.51674
TGGT1_268835	hypothetical protein	0.977079		-0.0334528
TGGT1_232230	ribosomal protein RPL30	0.976726	0.130093	-0.0339746	-2.94239
TGGT1_243250	myosin H	0.976493	2.36676	-0.0343189	1.24291
TGGT1_314750	hypothetical protein	0.975586	0.150531	-0.0356595	-2.73187
TGGT1_227600	ribosomal protein RPL34	0.975576	0.201583	-0.0356745	-2.31055
TGGT1_208830	hypothetical protein	0.974736	0.54681	-0.0369161	-0.870889
TGGT1_243910	Cof family hydrolase subfamily protein	0.974007	1.19025	-0.0379957	0.251264
TGGT1_257680	myosin light chain MLC1	0.973789	1.13922	-0.0383184	0.188052	MLC1
TGGT1_268850	enolase 2	0.973616	0.524029	-0.0385754	-0.932281
TGGT1_266990	beta-COP	0.97249	1.30052	-0.0402441	0.379083
TGGT1_219790B	pre-mRNA processing factor PRP3	0.972153	1.15543	-0.0407444	0.208433
TGGT1_263070	CMGC kinase, CK2 family	0.971058	1.12068	-0.0423712	0.164379
TGGT1_263500	putative vacuolar protein sorting-associated protein 26	0.969701	0.734076	-0.0443879	-0.445999
TGGT1_233260	putative GTP-binding protein	0.969684	1.94559	-0.0444139	0.96021
TGGT1_299210	CTP synthase	0.969653	0.183687	-0.0444597	-2.44468
TGGT1_288650	dense granule protein GRA12	0.969605	1.09069	-0.0445308	0.125246
TGGT1_283878	RNA recognition motif-containing protein	0.968214	0.360242	-0.0466019	-1.47296
TGGT1_263870	glutamate-tRNA ligase	0.967621	1.12955	-0.0474854	0.175749
TGGT1_283510	hypothetical protein	0.967144	0.188816	-0.0481978	-2.40494	IAP1
TGGT1_230410	peroxiredoxin PRX3	0.966551	0.552416	-0.0490823	-0.856172
TGGT1_273840	brix domain-containing protein	0.966455	0.599001	-0.049226	-0.739371
TGGT1_246920	glutathione reductase	0.966405		-0.0493
TGGT1_213000	putative replication factor C, subunit 5	0.965037	0.986111	-0.0513434	-0.0201781
TGGT1_223390	putative activating signal cointegrator 1 complex subunit 3 family 1 ASCC3L1	0.964278	0.881096	-0.0524786	-0.182629
TGGT1_230060	acetyltransferase, GNAT family protein	0.964088	0.560347	-0.0527626	-0.835607
TGGT1_235990	hypothetical protein	0.96398	0.568836	-0.0529255	-0.813915
TGGT1_265330	putative cell-cycle-associated protein kinase GSK	0.963299	0.662336	-0.0539447	-0.594366
TGGT1_359490	elongation factor 1-alpha	0.963092	0.823225	-0.0542546	-0.280642
TGGT1_294800B	putative elongation factor 1-alpha (EF-1-ALPHA)	0.963092	0.823225	-0.0542546	-0.280642
TGGT1_286420B	putative elongation factor 1-alpha (EF-1-ALPHA)	0.963092	0.823225	-0.0542546	-0.280642
TGGT1_269950	hypothetical protein	0.963039	0.687346	-0.0543343	-0.540891
TGGT1_249900	putative adenine nucleotide translocator	0.96288	1.07164	-0.0545719	0.099821
TGGT1_216720	hypothetical protein	0.962221	0.683548	-0.0555596	-0.548885
TGGT1_233695	hypothetical protein	0.962215	1.30588	-0.0555694	0.385023
TGGT1_218280	putative eukaryotic porin	0.962048	0.990017	-0.0558185	-0.014475
TGGT1_254440	ribosomal protein RPL12	0.961929	0.390472	-0.0559979	-1.35671
TGGT1_319850	splicing factor U2AF family SnRNP auxilary factor large subunit, RRM domain-containing protein	0.960993	0.382361	-0.0574025	-1.38699
TGGT1_318410	putative TCP-1 chaperonin	0.960702	0.836967	-0.0578392	-0.256758
TGGT1_231920	oxidoreductase, short chain dehydrogenase/reductase family protein	0.95939	0.859848	-0.0598111	-0.217847
TGGT1_252290	putative importin alpha	0.95617	1.2408	-0.0646602	0.311269
TGGT1_225080	ribosomal protein RPS18	0.95534	0.206564	-0.0659143	-2.27534
TGGT1_316540	IMC sub-compartment protein ISP3	0.954894	0.3997	-0.0665874	-1.32301	ISP3
TGGT1_262610	hypothetical protein	0.954853	0.834715	-0.06665	-0.260645
TGGT1_235160	hypothetical protein	0.954044	1.22167	-0.0678727	0.288852
TGGT1_234420	ATPase, AAA family protein	0.952858	0.776529	-0.0696664	-0.364889
TGGT1_236210	putative peptidase M16 family potein	0.951693	0.787504	-0.0714324	-0.34464
TGGT1_214150	putative mitochondrial inner membrane translocase subunit TIM17	0.951254	1.67811	-0.0720979	0.746837
TGGT1_289180	putative thioredoxin family redox-active protein	0.951217	0.902514	-0.0721532	-0.147979
TGGT1_261760	CDP-alcohol phosphatidyltransferase superfamily protein	0.949821	0.713937	-0.0742718	-0.486131
TGGT1_223050	ribosomal protein RPS20	0.948341	0.971777	-0.0765229	-0.0413031
TGGT1_273090	cell division protein CDC48CY	0.947852	0.168587	-0.0772666	-2.56843
TGGT1_244370	putative TDC1	0.947329	0.741056	-0.0780631	-0.432345
TGGT1_314810	ribosomal protein RPL7	0.946871	0.994938	-0.0787599	-0.00732177
TGGT1_314970	root hair defective 3 gtp-binding protein (rhd3) protein	0.945901	1.55606	-0.0802383	0.637897
TGGT1_268860	enolase 1	0.945577	0.496573	-0.0807333	-1.00992
TGGT1_293580	prefoldin subunit protein	0.944384	0.627361	-0.0825541	-0.672632
TGGT1_277270	NTPase II	0.944241	0.597951	-0.082773	-0.741902
TGGT1_300260	threonyl-tRNA synthetase family protein	0.943833	0.273548	-0.0833961	-1.87013
TGGT1_309190	hypothetical protein	0.943711	2.12342	-0.0835827	1.08639
TGGT1_310300	hypothetical protein	0.942205		-0.085887
TGGT1_288380	heat shock protein HSP90	0.941614	1.34385	-0.086792	0.426374
TGGT1_279100	hypothetical protein	0.941294	0.944504	-0.0872823	-0.0823716
TGGT1_285970	putative 30S ribosomal protein S5	0.941274		-0.0873135
TGGT1_244100	snoRNA binding domain-containing protein	0.940867	1.2787	-0.0879369	0.354674
TGGT1_226280	putative ribosomal protein L28	0.940656	0.725311	-0.0882605	-0.463328
TGGT1_257340	Ras family protein	0.940175	1.12492	-0.0889984	0.169822
TGGT1_274060	2-oxoglutarate/malate translocase OMT	0.939326	1.06754	-0.0903021	0.0942868
TGGT1_312050	putative small GTPase Rab2	0.938983	0.873473	-0.0908296	-0.195165
TGGT1_242330	ribosomal protein RPS5	0.938463	0.948746	-0.0916285	-0.0759054
TGGT1_284050	DEAD/DEAH box helicase domain-containing protein	0.938004	0.89251	-0.0923339	-0.16406
TGGT1_297780	ATPase/histidine kinase/DNA gyrase B/HSP90 domain-containing protein	0.937996	1.271	-0.0923466	0.345964
TGGT1_309210	putative peroxiredoxin 6	0.937371	0.174462	-0.0933084	-2.51901
TGGT1_212300	hypothetical protein	0.937189	0.630514	-0.0935886	-0.6654
TGGT1_292220	PCI domain-containing protein	0.936367	0.82313	-0.0948544	-0.280808
TGGT1_312990	DEAD/DEAH box ATP-dependent RNA helicase	0.935538	0.714224	-0.0961318	-0.485551
TGGT1_237140	putative ethylene inducible protein	0.935504	1.1906	-0.0961845	0.251687
TGGT1_266070	ribosomal protein RPL31	0.935291	1.21892	-0.0965126	0.285607
TGGT1_263050	ribosomal protein RPL13	0.935195	0.860733	-0.0966605	-0.216362
TGGT1_321500	RNA recognition motif-containing protein	0.934859	0.606976	-0.097179	-0.720289
TGGT1_208530	nicotinate phosphoribosyltransferase	0.933012	0.177962	-0.100032	-2.49036
TGGT1_223140	tRNA binding domain-containing protein	0.931165	0.624763	-0.102891	-0.67862
TGGT1_300140	putative elongation factor 1-gamma	0.930913	0.965626	-0.103282	-0.0504642
TGGT1_247470	putative nucleolar protein	0.930866	0.920822	-0.103354	-0.119006
TGGT1_285230	PRP38 family protein	0.929802	0.313311	-0.105004	-1.67433
TGGT1_289300	methionyl-tRNA synthetase	0.928745	0.331939	-0.106646	-1.59101
TGGT1_297960B	rhoptry neck protein RON6	0.928465	0.24394	-0.10708	-2.0354
TGGT1_207640	isoleucyl-tRNA synthetase family protein	0.928188	1.12062	-0.10751	0.164297
TGGT1_231080	ribosomal protein RPL38	0.927137	1.49173	-0.109146	0.576982
TGGT1_262690	ribosomal protein RPL27	0.92698	0.264036	-0.10939	-1.92119
TGGT1_290660	RNA recognition motif-containing protein	0.925708	0.471687	-0.111371	-1.0841
TGGT1_310430B	Hsp90 domain-containing protein	0.925149	0.970789	-0.112242	-0.0427702
TGGT1_235470	myosin A	0.924975	1.03641	-0.112514	0.0515889
TGGT1_202370	putative T-complex protein 1, epsilon subunit (TCP-1-epsilon)	0.924447	0.708697	-0.113338	-0.49676
TGGT1_285950	hypothetical protein	0.924394		-0.113421
TGGT1_248480	ribosomal protein RPS9	0.923327	0.900034	-0.115087	-0.151948
TGGT1_208790	putative MC family transporter	0.922523	0.908041	-0.116344	-0.139171
TGGT1_236520	hypothetical protein	0.922392	0.304904	-0.116547	-1.71357
TGGT1_318160	MSP (Major sperm protein) domain-containing protein	0.922352	0.298453	-0.116611	-1.74443
TGGT1_239752	hypothetical protein	0.922348	0.40946	-0.116617	-1.2882
TGGT1_316330	superoxide dismutase SOD2	0.921709		-0.117617
TGGT1_253290	valyl-tRNA synthetase	0.921212	1.00233	-0.118394	0.00336462
TGGT1_304710	putative eukaryotic peptide chain release factor	0.919908	1.67075	-0.120439	0.740498
TGGT1_270830	small nuclear ribonucleoprotein	0.919502	0.670082	-0.121075	-0.577591
TGGT1_290900	hydrolase, NUDIX family protein	0.919066	1.00891	-0.12176	0.0127943
TGGT1_316400B	alpha tubulin TUBA1	0.918353	1.56604	-0.122879	0.647123
TGGT1_283710	longevity-assurance protein (LAG1) domain-containing protein	0.918079	0.910229	-0.12331	-0.135699
TGGT1_272010	Gar1 protein RNA binding region protein	0.918032	0.470038	-0.123383	-1.08915
TGGT1_258500	hypothetical protein	0.917636		-0.124005
TGGT1_265450	hexokinase	0.917528	1.2481	-0.124176	0.319732
TGGT1_261950	ATP synthase beta subunit ATP-B	0.917478	0.713299	-0.124255	-0.487422
TGGT1_316350	hypothetical protein	0.917369	1.78094	-0.124426	0.83264
TGGT1_215980	hypothetical protein	0.916134	0.45054	-0.126369	-1.15027
TGGT1_320600	cold-shock DNA-binding domain-containing protein	0.915781	0.60667	-0.126925	-0.721016
TGGT1_285680	putative dihydrolipoamide acyltransferase	0.915673	0.307166	-0.127095	-1.70291
TGGT1_293380	histone lysine acetyltransferase HAT1	0.913681	1.24904	-0.130238	0.320822
TGGT1_221950	putative splicesome-associated protein	0.912378	0.455137	-0.132297	-1.13563
TGGT1_409330	putative polyketide synthase	0.911914	1.18626	-0.133031	0.246426
TGGT1_243950	putative prohibitin	0.910722	1.15536	-0.134918	0.20834
TGGT1_230430	putative vesicle-associated membrane protein	0.910458	0.391436	-0.135336	-1.35315
TGGT1_240380	hypothetical protein	0.910122	1.14761	-0.135867	0.198633
TGGT1_286790	nuclear factor NF2	0.908477		-0.138478
TGGT1_213730	lanthionine synthetase C family protein	0.907827	0.496369	-0.139511	-1.01052
TGGT1_411430	rhoptry protein ROP5	0.907408	0.683735	-0.140176	-0.548491
TGGT1_267620	multi-pass transmembrane protein	0.90729	1.01418	-0.140364	0.0203161
TGGT1_212240	putative beta-1 tubulin	0.905757	1.02467	-0.142803	0.0351558
TGGT1_305850	RNA recognition motif-containing protein	0.905102	0.775649	-0.143848	-0.366525
TGGT1_207840	ribosomal protein RPS17	0.90499	1.4515	-0.144026	0.53754
TGGT1_275690	putative ClpB	0.904208	0.492465	-0.145273	-1.02191
TGGT1_280518	hypothetical protein	0.903085	0.187727	-0.147067	-2.41329
TGGT1_233140	putative deoxyuridine 5'-triphosphate nucleotidohydrolase	0.901497	0.245045	-0.149605	-2.02888
TGGT1_239760	ribosomal protein RPL22	0.901361	1.07992	-0.149823	0.110924
TGGT1_231770	putative alpha-tubulin I	0.899486	1.84962	-0.152827	0.887226
TGGT1_266800	putative integral membrane protein	0.899106	0.962518	-0.153436	-0.0551142
TGGT1_235970	putative eukaryotic initiation factor-2 gamma	0.898232	0.590315	-0.15484	-0.760444
TGGT1_290670	leucyl aminopeptidase LAP	0.897867	0.437466	-0.155426	-1.19276
TGGT1_251780	heat shock protein	0.895921	0.577945	-0.158557	-0.790995
TGGT1_260440	nuclear factor NF3	0.895282	0.664828	-0.159586	-0.588946
TGGT1_226960	phosphofructokinase PFKII	0.894695	0.451422	-0.160532	-1.14745
TGGT1_261460	transcriptional elongation factor FACT80	0.893954	0.806975	-0.161727	-0.309404
TGGT1_230960	putative splicing factor 3b, subunit 3	0.893652	0.968924	-0.162216	-0.0455441
TGGT1_245670	pyruvate dehydrogenase complex subunit PDH-E1Alpha	0.893376	0.916271	-0.16266	-0.126153
TGGT1_320050	ribosomal protein RPL5	0.891863	1.23574	-0.165106	0.30538
TGGT1_218410	ribosomal protein RPP0	0.891461	0.747509	-0.165757	-0.419838
TGGT1_240690	S-adenosyl methionine synthetase	0.89115	1.26582	-0.16626	0.340069
TGGT1_312390	hypothetical protein	0.891022	0.133477	-0.166468	-2.90534
TGGT1_278530	putative multiprotein bridging factor type 1 family transcriptional co-activator	0.890032	0.747598	-0.16807	-0.419666
TGGT1_306060	rhoptry neck protein RON8	0.889766	0.586437	-0.168502	-0.769953
TGGT1_280610	signal recognition particle receptor alpha subunit	0.889515	0.947397	-0.168908	-0.0779592
TGGT1_320220	putative ubiquinol cytochrome c oxidoreductase	0.888702	2.62513	-0.170229	1.39239
TGGT1_209030	actin ACT1	0.886908	1.12846	-0.173144	0.174359
TGGT1_283780	glucose-6-phosphate isomerase GPI	0.885351	0.744587	-0.175679	-0.425487
TGGT1_313560	putative 60S ribosomal protein L7a	0.885017	0.787777	-0.176222	-0.344141
TGGT1_202680	putative peptidase M16, alpha subunit	0.883276	0.926408	-0.179063	-0.110281
TGGT1_311430	fibrillarin	0.882762	0.560391	-0.179903	-0.835494
TGGT1_285850	peptidyl-prolyl cis-trans isomerase, FKBP-type domain-containing protein	0.881523	0.712722	-0.18193	-0.488588
TGGT1_285980B	glucosephosphate-mutase GPM1	0.881361	0.754989	-0.182195	-0.405472
TGGT1_240280	S1/P1nuclease	0.881333	0.319108	-0.182241	-1.64788
TGGT1_275650	hypothetical protein	0.881073	0.403967	-0.182667	-1.30769
TGGT1_219630	flavodoxin domain-containing protein	0.880072	0.916439	-0.184307	-0.125888
TGGT1_266960	beta-tubulin	0.878173	1.47368	-0.187422	0.559423
TGGT1_234450	ribosomal protein RPS15A	0.877786	1.16847	-0.18806	0.224624
TGGT1_269885A	rhoptry metalloprotease toxolysin TLN1	0.876049	0.537751	-0.190916	-0.894989
TGGT1_220300	ribosomal protein L15 protein	0.875849	0.422831	-0.191245	-1.24185
TGGT1_221620	putative beta-tubulin	0.875769	1.11534	-0.191378	0.157486
TGGT1_263180	myosin D	0.875584	0.111538	-0.191682	-3.16439
TGGT1_294040	putative KDEL endoplasmic reticulum proteinretention receptor 2 (KDELR2)	0.875078	0.456953	-0.192517	-1.12988
TGGT1_218400	NEK kinase	0.874624	1.10488	-0.193266	0.143885
TGGT1_203990	rhoptry protein ROP12	0.874352	0.681558	-0.193714	-0.553091
TGGT1_258110	N-acetylglucosaminylphosphatidylinositol deacetylase	0.874006	0.91452	-0.194285	-0.128913
TGGT1_295125	rhoptry protein ROP4	0.873492	0.496266	-0.195133	-1.01082
TGGT1_310700	serine/threonine phosophatase PP1	0.873013	0.331594	-0.195926	-1.59251
TGGT1_264440	signal recognition particle receptor beta subunit protein	0.87268	0.652732	-0.196475	-0.615438
TGGT1_249030	endonuclease/exonuclease/phosphatase family protein	0.871912	1.07677	-0.197745	0.106707
TGGT1_219800	putative vacuolar ATP synthase subunit b	0.870066	1.25446	-0.200803	0.327065
TGGT1_275860	hypothetical protein	0.869977	0.698194	-0.200951	-0.5183
TGGT1_313390	ribosomal protein RPL6	0.868127	1.5135	-0.204021	0.597891
TGGT1_216180	hypothetical protein	0.867456	0.649558	-0.205138	-0.62247
TGGT1_259240	ribosomal protein RPS21	0.867165	0.17983	-0.205621	-2.47529
TGGT1_299110	cleft lip and palate transmembrane protein 1 (clptm1) protein	0.866171	0.577811	-0.207276	-0.79133
TGGT1_228490	hypothetical protein	0.865098	0.43031	-0.209064	-1.21655
TGGT1_295110	rhoptry protein ROP7	0.864968	0.603238	-0.209282	-0.7292
TGGT1_251880	tRNA synthetases class I family protein	0.864291	0.899668	-0.210411	-0.152535
TGGT1_245620	ribosomal-ubiquitin protein RPS27A	0.864066	0.234254	-0.210786	-2.09386
TGGT1_206470	pyruvate dehydrogenase complex subunit PDH-E3II	0.860923	0.979154	-0.216044	-0.0303919
TGGT1_251620	putative flap structure-specific endonuclease 1	0.860745	0.666276	-0.216343	-0.585808
TGGT1_249180	bifunctional dihydrofolate reductase-thymidylate synthase	0.860114	0.490583	-0.217401	-1.02743
TGGT1_263320	hypothetical protein	0.86	0.988623	-0.217591	-0.016507
TGGT1_229990	putative T-complex protein 1 subunit alpha	0.859733	0.716482	-0.218039	-0.480998
TGGT1_279330	DEAD/DEAH box helicase family protein	0.858024	0.861104	-0.220911	-0.21574
TGGT1_411470	putative transmembrane protein	0.857875	0.262913	-0.22116	-1.92734
TGGT1_226410	EF-1 guanine nucleotide exchange domain-containing protein	0.85535	0.594318	-0.225413	-0.750694
TGGT1_228190	putative eukaryotic initiation factor-3, subunit 5	0.854039	0.618204	-0.227626	-0.693845
TGGT1_229180	HEAT repeat-containing protein	0.853796	0.436083	-0.228037	-1.19733
TGGT1_293690	profilin PRF	0.85367	0.377327	-0.22825	-1.40611
TGGT1_290950	putative clathrin heavy chain	0.853232	1.13658	-0.228989	0.184704
TGGT1_200470	hypothetical protein	0.851208	0.639109	-0.232416	-0.645866
TGGT1_219820	putative polyubiquitin UbC	0.8496	0.563454	-0.235144	-0.827631
TGGT1_289750	ribosomal-ubiquitin protein RPL40	0.8496	0.563454	-0.235144	-0.827631
TGGT1_315220	rhoptry protein ROP14	0.848955	0.616773	-0.23624	-0.697189
TGGT1_279390	putative proliferation-associated protein 2G4	0.848903	0.714816	-0.236328	-0.484357
TGGT1_270380	ribosomal protein RPS13	0.848696	1.34565	-0.23668	0.4283
TGGT1_239820	D-3-phosphoglycerate dehydrogenase	0.848466	1.13112	-0.237071	0.177754
TGGT1_290600	succinyl-CoA-synthetase alpha SCSA	0.848357	0.243998	-0.237257	-2.03506
TGGT1_216220	AP2 domain transcription factor AP2XI-5	0.847755	0.599468	-0.238281	-0.738245
TGGT1_291330	RNA recognition motif-containing protein	0.846341	1.04205	-0.240689	0.0594201
TGGT1_232250	catalase	0.84581	0.165873	-0.241594	-2.59185
TGGT1_319550	putative membrane protein C17G8.08c	0.84507	0.826027	-0.242858	-0.27574
TGGT1_319530	splicing factor SF2	0.844894	0.125033	-0.243157	-2.99962
TGGT1_249990	hypothetical protein	0.844831	0.389254	-0.243265	-1.36122
TGGT1_278660	putative P-type ATPase4	0.844	0.690938	-0.244686	-0.533372
TGGT1_232130	hypothetical protein	0.84316	0.642613	-0.246121	-0.637979
TGGT1_219150	zinc finger, zz type domain-containing protein	0.843052		-0.246307
TGGT1_256990	glycyl-tRNA synthetase	0.842922	0.882992	-0.24653	-0.179528
TGGT1_315930	putative integral membrane protein, DUF56 family protein	0.841413	1.17798	-0.249114	0.236317
TGGT1_314740	PSP protein	0.841287	0.71925	-0.24933	-0.475435
TGGT1_278990	putative phosphate carrier	0.841085	0.52182	-0.249676	-0.938377
TGGT1_223920	rhoptry neck protein RON3	0.840934	0.798176	-0.249936	-0.325221
TGGT1_236570	lysine decarboxylase family protein	0.840886	1.87683	-0.250018	0.908299
TGGT1_264450	putative DNA topoisomerase III beta-1	0.840279	0.538329	-0.25106	-0.89344
TGGT1_251690	putative seryl-tRNA synthetase, cytoplasmic	0.840167	0.471974	-0.251252	-1.08322
TGGT1_214350	putative GTP-binding protein	0.839243	0.993096	-0.25284	-0.00999511
TGGT1_238180	putative 26s proteasome regulatory complex subunit	0.839205		-0.252905
TGGT1_262920	trypsin domain-containing protein	0.839198	1.62636	-0.252917	0.701649
TGGT1_208560	carrier superfamily protein	0.838344	0.272244	-0.254386	-1.87703
TGGT1_242660	putative vacuolar sorting protein 35	0.838096	0.883828	-0.254812	-0.178163
TGGT1_273870	SWI2/SNF2 ISWI-like (AT hook)	0.837463	0.744388	-0.255903	-0.425874
TGGT1_311720	chaperonin protein BiP	0.837178	0.817288	-0.256393	-0.291083
TGGT1_215280	succinate dehydrogenase [ubiquinone] iron-sulfur protein	0.836993	0.872985	-0.256712	-0.195972
TGGT1_299780	hypothetical protein	0.836876	0.521835	-0.256915	-0.938334
TGGT1_258580	rhoptry protein ROP17	0.836401	0.823277	-0.257733	-0.280549
TGGT1_307570	putative glycerol-3-phosphate dehydrogenase (gpdh)	0.835674		-0.258989
TGGT1_248810	nuclear factor NF7	0.834622	0.619015	-0.260806	-0.691954
TGGT1_311470	rhoptry neck protein RON5	0.834335	0.511769	-0.261301	-0.966434
TGGT1_263090	14-3-3 protein	0.833626	0.430425	-0.262528	-1.21617	14-3-3
TGGT1_238150	hypothetical protein	0.833613	0.538647	-0.262551	-0.892589
TGGT1_234380	hypothetical protein	0.833118	1.80542	-0.263408	0.852336
TGGT1_248340	GTP-binding nuclear protein ran/tc4	0.832729	1.54611	-0.26408	0.628639
TGGT1_229620	hypothetical protein	0.832265	0.630148	-0.264885	-0.666238
TGGT1_292080	leucyl-tRNA synthetase	0.832198	0.995675	-0.265001	-0.00625369
TGGT1_217540	RNA recognition motif-containing protein	0.829382	0.214426	-0.269892	-2.22145
TGGT1_219832	cyclin-dependent kinase regulatory subunit protein	0.829163	0.628155	-0.270272	-0.670808
TGGT1_227960	PCI domain-containing protein	0.828739	1.07668	-0.27101	0.106592
TGGT1_230450	bifunctional GMP synthase/glutamine amidotransferase protein	0.828421	0.606579	-0.271565	-0.721232
TGGT1_233100	SPFH domain / Band 7 family protein	0.827779	1.3495	-0.272683	0.432423
TGGT1_216860	DEAD (Asp-Glu-Ala-Asp) box polypeptide DDX39	0.827674	0.860776	-0.272865	-0.216291
TGGT1_305050	putative calmodulin	0.82679	0.129517	-0.274407	-2.94879
TGGT1_280600	putative histidyl-tRNA synthetase (HisRS)	0.824987	0.620074	-0.277557	-0.689488
TGGT1_210370	hypothetical protein	0.824548	0.94645	-0.278325	-0.0794016
TGGT1_410360	putative transmembrane protein	0.824046	0.625283	-0.279204	-0.677418
TGGT1_219320	acid phosphatase GAP50	0.822228	0.920949	-0.282389	-0.118807	GAP50
TGGT1_304760	RNA recognition motif-containing protein	0.822025	0.406299	-0.282746	-1.29939
TGGT1_242800	putative ribosome biogenesis protein NSA2	0.821598	2.16161	-0.283496	1.11211
TGGT1_247350	thioredoxin domain-containing protein	0.821013	0.309821	-0.284523	-1.69049
TGGT1_271820	lipoyltransferase and lipoate-protein ligase subfamily protein	0.820056		-0.286205
TGGT1_267600	FHA domain-containing protein	0.819928	0.649986	-0.286431	-0.621519
TGGT1_309560	nmda receptor glutamate-binding chain	0.818571	3.07465	-0.288821	1.62042
TGGT1_215610	hypothetical protein	0.817907	0.143953	-0.289992	-2.79633
TGGT1_201520	protein phosphatase 2C domain-containing protein	0.816752	0.956869	-0.29203	-0.0636074
TGGT1_300060	signal peptidase subunit protein	0.816427	0.83883	-0.292603	-0.25355
TGGT1_265530	RNA recognition motif-containing protein	0.815989	0.226578	-0.293379	-2.14192
TGGT1_363030	rhoptry protein ROP8	0.815578	0.806897	-0.294106	-0.309543
TGGT1_297170	putative 50S ribosomal protein L17	0.815135		-0.294889
TGGT1_262380	putative elongation factor Tu	0.814393	0.778561	-0.296203	-0.361117
TGGT1_235020	putative COPI protein	0.813847	0.935549	-0.29717	-0.096115
TGGT1_212090	hypothetical protein	0.813722	0.967466	-0.297391	-0.0477169
TGGT1_319340	hypothetical protein	0.81367	0.656168	-0.297484	-0.607863
TGGT1_214440	4'-phosphopantetheinyl transferase superfamily protein	0.813243	0.802821	-0.298241	-0.31685
TGGT1_291310	putative V-ATPase subunit c' proteolipid	0.812789	2.57849	-0.299047	1.36653
TGGT1_270510	asparaginyl-tRNA synthetase (NOB+tRNA synthase)	0.811018	1.00629	-0.302194	0.00904471
TGGT1_208350	hypothetical protein	0.810621		-0.3029
TGGT1_263530	putative chaperonin	0.810594	0.339374	-0.302949	-1.55905
TGGT1_309590	rhoptry protein ROP1	0.809827	0.613953	-0.304315	-0.703801
TGGT1_280380	poly(ADP-ribose) glycohydrolase	0.8095	0.150989	-0.304897	-2.72749
TGGT1_312590	hypothetical protein	0.808607		-0.306489
TGGT1_313640	hypothetical protein	0.808072	0.156205	-0.307444	-2.67849
TGGT1_289770	mu1 adaptin	0.808007	0.817467	-0.307561	-0.290768
TGGT1_219250	acetyltransferase, GNAT family protein	0.80761	0.781176	-0.308269	-0.356281
TGGT1_324600	heat shock protein	0.806989	1.20724	-0.309378	0.271713
TGGT1_317720	putative eukaryotic translation initiation factor 3 subunit 7	0.806242	0.482951	-0.310715	-1.05005
TGGT1_228290	phospholipase/carboxylesterase	0.805877	0.68333	-0.311369	-0.549345
TGGT1_247195	microneme protein MIC15	0.805356	0.926369	-0.312301	-0.110341
TGGT1_309730	thioredoxin reductase	0.805038	0.0417088	-0.312871	-4.5835
TGGT1_239050	hypothetical protein	0.805009	0.769402	-0.312923	-0.37819
TGGT1_201400	Sin3-associated polypeptide SAP18	0.804692	0.234361	-0.313491	-2.09319
TGGT1_224220	serine/threonine-protein phosphatase PP2A catalytic subunit	0.80435	1.09523	-0.314104	0.131236
TGGT1_261010	putative tat-binding family protein	0.803027	0.781799	-0.316479	-0.35513
TGGT1_305290	putative vacuolar atp synthase subunit e	0.802069	0.51917	-0.318202	-0.94572
TGGT1_290940	EMP/nonaspanin domain family protein	0.802028	0.41011	-0.318275	-1.28592
TGGT1_247510	fructose-bisphospatase II	0.801918	0.901384	-0.318473	-0.149786
TGGT1_252360	rhoptry kinase family protein ROP24 (incomplete catalytic triad)	0.801859	0.8205	-0.318579	-0.285425
TGGT1_271440	NPL4 family protein	0.801274	0.693756	-0.319632	-0.5275
TGGT1_244560	putative heat shock protein 90	0.801187	0.928619	-0.31979	-0.106841
TGGT1_257740	UMP-CMP kinase	0.801104	0.472504	-0.319938	-1.0816
TGGT1_226030	AGC kinase	0.800307	0.684725	-0.321375	-0.546404
TGGT1_214250	hypothetical protein	0.800139	0.907798	-0.321677	-0.139557
TGGT1_314400	putative pyruvate dehydrogenase E1 component, beta subunit	0.799385	0.610159	-0.323037	-0.712744
TGGT1_305160	histone H2Ba	0.799321	0.456589	-0.323152	-1.13103
TGGT1_251870	histone H2Bb	0.799321	0.456589	-0.323152	-1.13103
TGGT1_286610	putative ribosomal protein RPS14	0.79923	1.68707	-0.323317	0.754519
TGGT1_216435	hypothetical protein	0.798735	0.368275	-0.324211	-1.44115
TGGT1_289690	glyceraldehyde-3-phosphate dehydrogenase GAPDH1	0.798593	1.45688	-0.324468	0.54288
TGGT1_310750	emp24/gp25L/p24 family protein	0.798478	0.626394	-0.324675	-0.674858
TGGT1_257390	ribosome biogenesis GTP-binding protein YsxC protein	0.798423	1.60354	-0.324775	0.681262
TGGT1_239490	dehydrogenase E1 component family protein	0.798013	0.745878	-0.325516	-0.422989
TGGT1_261240	histone H3	0.797974	0.4178	-0.325587	-1.25912
TGGT1_218260	histone H3.3	0.797974	0.4178	-0.325587	-1.25912
TGGT1_285980A	glucosephosphate-mutase GPM1	0.797309	0.564072	-0.326789	-0.826048
TGGT1_226980	hypothetical protein	0.794971	0.416414	-0.331027	-1.26391
TGGT1_229420	putative cytochrome c	0.793594	0.183925	-0.333527	-2.44281
TGGT1_201120	ELMO/CED-12 family protein	0.793088	0.235804	-0.334447	-2.08434
TGGT1_223020	coproporphyrinogen III oxidase	0.792353		-0.335784
TGGT1_247550	heat shock protein HSP60	0.792164	0.250707	-0.336129	-1.99593
TGGT1_318580	glucosephosphate-mutase GPM2	0.792123	0.688314	-0.336203	-0.538861
TGGT1_263850	hypothetical protein	0.792091	0.688452	-0.336261	-0.538572
TGGT1_288830	NADH dehydrogenase (NDH2-II)	0.790483	0.867032	-0.339194	-0.205842
TGGT1_313070	hypothetical protein	0.790185	1.11971	-0.339737	0.16313
TGGT1_263710	acyl-CoA:cholesterol acyltransferase alpha ACAT1-alpha	0.789987	0.804517	-0.340099	-0.313805
TGGT1_264600	hypothetical protein	0.789563	0.352628	-0.340874	-1.50378
TGGT1_238070	glutaredoxin domain-containing protein	0.788369	0.24263	-0.343057	-2.04317
TGGT1_313960	ribosomal protein L19 protein	0.787522	1.08367	-0.344608	0.115932
TGGT1_290180	AP2 domain transcription factor AP2IX-6	0.786115	0.953991	-0.347187	-0.0679521
TGGT1_277910	thrombospondin type 1 domain-containing protein	0.786041	0.590988	-0.347324	-0.758799
TGGT1_294290	Der1ER1	0.785656	0.587112	-0.348031	-0.768293
TGGT1_360830	nucleoside-triphosphatase	0.78546	0.786571	-0.34839	-0.346351
TGGT1_291690	hypothetical protein	0.785067	1.48745	-0.349112	0.572838
TGGT1_226430	reticulon protein	0.78453	0.655569	-0.3501	-0.609181
TGGT1_263520	microtubule associated protein SPM1	0.784496	0.515658	-0.350162	-0.955514
TGGT1_408820	NTPase	0.784398	0.665484	-0.350341	-0.587524
TGGT1_258870A	hypothetical protein	0.784378	0.437925	-0.350378	-1.19125
TGGT1_263730	FAD-dependent glycerol-3-phosphate dehydrogenase	0.784182	0.73618	-0.35074	-0.441869
TGGT1_313140	isocitrate dehydrogenase	0.783855	0.460677	-0.351341	-1.11817
TGGT1_207720	hypothetical protein	0.782851	0.623977	-0.353191	-0.680435
TGGT1_257750	homocysteine s-methyltransferase domain-containing protein	0.782848		-0.353196
TGGT1_286210	protein phosphatase 4, catalytic subunit	0.782837	0.437965	-0.353217	-1.19111
TGGT1_211710	TB2/DP1, HVA22 family protein	0.782221	0.28816	-0.354352	-1.79506
TGGT1_289310	cullin family protein	0.782089	0.914932	-0.354596	-0.128264
TGGT1_269840	proteasome regulatory subunit	0.781422	0.661759	-0.355826	-0.595621
TGGT1_256050	signal recognition particle 14kd protein	0.78045	0.262992	-0.357623	-1.92691
TGGT1_202390	S15 sporozoite-expressed protein	0.780401	0.934081	-0.357712	-0.0983807	Msc1b
TGGT1_221522	adaptor complexes medium subunit family protein	0.779968	1.00086	-0.358513	0.001244
TGGT1_257990	putative heat shock protein 101	0.778861	0.996621	-0.360562	-0.00488271
TGGT1_276140	ADP ribosylation factor ARF1	0.77861	1.15519	-0.361027	0.208126
TGGT1_211250	hypothetical protein	0.778477	0.780892	-0.361273	-0.356805
TGGT1_202530	aspartate-tRNA ligase	0.778457	1.0296	-0.36131	0.0420878
TGGT1_219540	cytosolic tRNA-Ala synthetase	0.7784	0.497805	-0.361416	-1.00635
TGGT1_222952	phosphohistidine phosphatase	0.777748	0.275256	-0.362625	-1.86115
TGGT1_272660	hypothetical protein	0.77767	0.445277	-0.36277	-1.16723
TGGT1_247410	hypothetical protein	0.777054	0.627597	-0.363914	-0.67209
TGGT1_300100	rhoptry neck protein RON2	0.77693	0.54959	-0.364143	-0.863573
TGGT1_251810	putative translation initiation factor eIF-5A	0.775548	0.265604	-0.366712	-1.91265
TGGT1_230520	putative cyclophilin 1	0.774615	0.236751	-0.368448	-2.07855
TGGT1_253350	hypothetical protein	0.77407	0.714682	-0.369464	-0.484626
TGGT1_211690	AAA family protein	0.773905	1.23032	-0.369771	0.299033
TGGT1_208590	putative vacuolar ATP synthase subunit 54kD	0.772231	0.999607	-0.372897	-0.000567641
TGGT1_309752	putative succinate-Coenzyme A ligase, beta subunit	0.771812	0.930891	-0.37368	-0.103316
TGGT1_238130	hypothetical protein	0.771388	1.20072	-0.374471	0.263906
TGGT1_227910	hypothetical protein	0.771078	1.11974	-0.375051	0.163169
TGGT1_318510	putative N-ethylmaleimide-sensitive fusion protein	0.769928	1.12658	-0.377204	0.171952
TGGT1_263440	hypothetical protein	0.769841	1.13258	-0.377368	0.179616
TGGT1_260180	hypothetical protein	0.769517	1.11812	-0.377974	0.16107
TGGT1_262620	RNA recognition motif-containing protein	0.769098	0.290097	-0.378761	-1.78539
TGGT1_310040	putative ubiquitin conjugating enzyme E2	0.768781	0.532743	-0.379355	-0.908488
TGGT1_306650	hypothetical protein	0.767389	0.25823	-0.381971	-1.95327
TGGT1_279340	hypothetical protein	0.767112	3.10313	-0.38249	1.63372
TGGT1_268890	citrate synthase I	0.766481	0.170316	-0.383678	-2.55371
TGGT1_224480	putative cell-cycle-associated protein kinase CLK	0.766156	1.13262	-0.38429	0.179663
TGGT1_225940	hypothetical protein	0.765856	0.297466	-0.384856	-1.7492
TGGT1_267330	fumarate hydratase	0.765464	0.478189	-0.385594	-1.06435
TGGT1_205510	putative nucleolar protein 5	0.765065	0.763273	-0.386346	-0.38973
TGGT1_312270	rhoptry protein ROP13	0.763546	0.528909	-0.389214	-0.918908
TGGT1_278830	glucose-6-phosphate 1-dehydrogenase	0.763229	0.730792	-0.389812	-0.452467
TGGT1_301130	hypothetical protein	0.763165	14.9606	-0.389933	3.9031
TGGT1_253750	PLU-1 family protein	0.762835	0.764082	-0.390556	-0.388201
TGGT1_286470	AGC kinase	0.758155	0.688825	-0.399435	-0.537791
TGGT1_228420	protein kinase, cAMP-dependent, catalytic chain	0.758155	0.688825	-0.399435	-0.537791
TGGT1_264840	ATP-dependent DNA helicase, RecQ family protein	0.75801	0.884826	-0.39971	-0.176534
TGGT1_286620	S1 RNA binding domain-containing protein	0.756897	1.55635	-0.40183	0.638163
TGGT1_249610	hypothetical protein	0.756412	0.518711	-0.402756	-0.946996
TGGT1_233830	hypothetical protein	0.756204	0.753228	-0.403152	-0.408842
TGGT1_311840	hypothetical protein	0.755864	0.50997	-0.403802	-0.971516
TGGT1_294200	glucose-6-phosphate 1-dehydrogenase	0.755514	0.659884	-0.40447	-0.599715
TGGT1_260010	acetyltransferase, GNAT family protein	0.755348	0.797157	-0.404786	-0.327065
TGGT1_313000	Toxoplasma gondii family D protein	0.754617	0.547497	-0.406184	-0.869078
TGGT1_310080	AMP-binding enzyme domain-containing protein	0.754529	0.429498	-0.406352	-1.21928
TGGT1_236190	hypothetical protein	0.752621	0.607406	-0.410004	-0.719268
TGGT1_312630	putative anonymous antigen-1	0.750904	1.50689	-0.4133	0.591574
TGGT1_207620	pyridine nucleotide-disulfide oxidoreductase domain-containing protein	0.750048	0.701865	-0.414945	-0.510735
TGGT1_313830	AARP2CN (NUC121) domain-containing protein	0.749296	0.35487	-0.416393	-1.49464
TGGT1_225150	hypothetical protein	0.749001	0.719569	-0.41696	-0.474794
TGGT1_212310	vacuolar ATP synthetase	0.748927	1.43357	-0.417103	0.51961
TGGT1_307850	6-phosphogluconate dehydrogenase	0.74806	0.895799	-0.418774	-0.158753
TGGT1_247520	hypothetical protein	0.74779	0.467958	-0.419295	-1.09555
TGGT1_290890	putative carbonyl reductase 1	0.747319	0.559189	-0.420205	-0.838593
TGGT1_263300	eukaryotic porin protein	0.746873	0.560032	-0.421066	-0.836419
TGGT1_294800A	putative elongation factor 1-alpha (EF-1-ALPHA)	0.746804	0.583026	-0.421199	-0.778367
TGGT1_286420A	putative elongation factor 1-alpha (EF-1-ALPHA)	0.746804	0.583026	-0.421199	-0.778367
TGGT1_260630	DnaJ family Sec63 protein	0.745728	0.915232	-0.423279	-0.127791
TGGT1_211020	RNA recognition motif-containing protein	0.744848	0.30428	-0.424981	-1.71653
TGGT1_267480	putative tRNA (guanine(26)-N(2))-dimethyltransferase	0.744448	0.63719	-0.425758	-0.650203
TGGT1_252430	hypothetical protein	0.74238	1.30038	-0.429771	0.378931
TGGT1_239260	histone H4	0.742101	0.299594	-0.430313	-1.73892
TGGT1_251680	putative histamine-releasing factor	0.741903	0.231746	-0.430698	-2.10939
TGGT1_223930	RNA recognition motif-containing protein	0.741364	0.360601	-0.431746	-1.47153
TGGT1_242070	cAMP-dependent protein kinase regulatory subunit	0.741083	0.60482	-0.432292	-0.725421
TGGT1_284190	pyruvate carboxylase	0.739022	0.527288	-0.436311	-0.923336
TGGT1_229640	hypothetical protein	0.738838	0.943927	-0.43667	-0.0832535
TGGT1_263810	hypothetical protein	0.738511	0.697564	-0.437309	-0.519602
TGGT1_205240	cleft lip and palate transmembrane protein 1 (clptm1) protein	0.736695	0.591526	-0.440861	-0.757487
TGGT1_258940	acylphosphatase family protein	0.736379	0.105228	-0.44148	-3.24841
TGGT1_217740	3-ketoacyl-(acyl-carrier-protein) reductase	0.733391	0.541334	-0.447345	-0.885408
TGGT1_251630	slc30a2 protein	0.730535	0.26188	-0.452975	-1.93302
TGGT1_211300	putative DUF74 family protein	0.730325	1.36136	-0.453389	0.445044
TGGT1_315210	putative rhoptry protein	0.730248	0.768922	-0.453542	-0.379091
TGGT1_320010	hypothetical protein	0.730223	0.624857	-0.453591	-0.678403
TGGT1_248740	hypothetical protein	0.72883	0.433559	-0.456347	-1.2057
TGGT1_204480	thioredoxin domain-containing protein	0.728217	0.836636	-0.457559	-0.257328
TGGT1_301440	calcium-dependent protein kinase CDPK1	0.727099	0.654909	-0.459777	-0.610633
TGGT1_315860	EF hand domain-containing protein	0.725583	1.03794	-0.462788	0.0537298
TGGT1_308020	SAG-related sequence SRS57	0.725332	0.664253	-0.463286	-0.590194
TGGT1_291930	RNA recognition motif-containing protein	0.724669	0.304147	-0.464606	-1.71716
TGGT1_262935	hypothetical protein	0.724121	0.300355	-0.465698	-1.73526
TGGT1_244390	coatomer epsilon subunit protein	0.723337	0.769651	-0.46726	-0.377723
TGGT1_255260	apical membrane antigen AMA1	0.72331	0.448792	-0.467314	-1.15588
TGGT1_255690	2-C-methyl-D-erythritol 2,4-cyclodiphosphate synthase domain-containing protein	0.723112	0.744668	-0.467709	-0.425331
TGGT1_306380	U1 zinc finger protein	0.72311	0.116897	-0.467713	-3.09669
TGGT1_226830	DnaK family protein	0.721949	0.534795	-0.47003	-0.902943
TGGT1_219850	prolyl-tRNA synthetase (ProRS)	0.721705	0.938784	-0.470518	-0.0911353
TGGT1_202200	hypothetical protein	0.720394	0.598048	-0.473141	-0.741666
TGGT1_254120	putative autophagy-related protein 8 atg8	0.720153	0.313208	-0.473625	-1.67481
TGGT1_236540	RNA recognition motif-containing protein	0.719693	0.173185	-0.474546	-2.52962
TGGT1_206590	calcium-dependent protein kinase CDPK2A	0.719685	0.271203	-0.474563	-1.88255
TGGT1_240520	hypothetical protein	0.718642		-0.476654
TGGT1_220240	hypothetical protein	0.717418	0.45565	-0.479115	-1.134
TGGT1_267060	ribosomal protein RPL14	0.716669	1.23597	-0.480621	0.305645
TGGT1_240600	putative chaperonin cpn60	0.715064	0.0499787	-0.483856	-4.32254
TGGT1_294560	rhoptry kinase family protein ROP37 (incomplete catalytic triad)	0.713395	0.394692	-0.487228	-1.3412
TGGT1_318230	phosphoglycerate kinase PGKI	0.712373	0.156093	-0.489296	-2.67952
TGGT1_202630	ATP-dependent metallopeptidase HflB subfamily protein	0.712307	0.338655	-0.48943	-1.56211
TGGT1_215775	rhoptry protein ROP8	0.708809	0.659141	-0.49653	-0.60134
TGGT1_261580	histone H2AX	0.708698	0.362425	-0.496757	-1.46425
TGGT1_290720	putative vacuolar proton translocating ATPase subunit	0.707975	3.48947	-0.498229	1.80301
TGGT1_313080	hypothetical protein	0.704766	0.818349	-0.504784	-0.289213
TGGT1_273920	putative aldose reductase	0.702175	0.747608	-0.510097	-0.419646
TGGT1_232050	DnaJ domain-containing protein	0.701637	0.423803	-0.511202	-1.23853
TGGT1_273360	ABC transporter transmembrane region domain-containing protein	0.700312	0.806572	-0.51393	-0.310125
TGGT1_298970	LSM3, U6 small nuclear RNA associated isoform 2 family protein	0.699257	0.301788	-0.516104	-1.72839
TGGT1_305860	calcium-dependent protein kinase CDPK3	0.69883	0.731358	-0.516986	-0.45135
TGGT1_215590	flavoprotein subunit of succinate dehydrogenase	0.697024	0.765322	-0.520721	-0.385862
TGGT1_252500	polo kinase	0.696774	1.04613	-0.521238	0.0650622
TGGT1_214290	DJ-1 family protein	0.694377	0.333968	-0.526209	-1.58222
TGGT1_306030	glutathione s-transferase, n-terminal domain containing protein	0.693701	0.828687	-0.527614	-0.271101
TGGT1_257040	TB2/DP1, HVA22 family protein	0.692326	0.360214	-0.530477	-1.47308
TGGT1_286600	hypothetical protein	0.691729	0.641085	-0.531721	-0.641413
TGGT1_253090	DEAD/DEAH box helicase domain-containing protein	0.691629	0.788791	-0.53193	-0.342285
TGGT1_306195	hypothetical protein	0.690998	0.550344	-0.533247	-0.861594
TGGT1_220400	actin depolymerizing factor ADF	0.685625	0.488226	-0.544508	-1.03438
TGGT1_290040	putative macrophage migration inhibitory factor	0.685218	0.0931208	-0.545365	-3.42475
TGGT1_298020	DEAD-family helicase	0.683488	0.986169	-0.549013	-0.0200937
TGGT1_259010	putative vacuolar ATP synthase subunit d	0.682574	4.21133	-0.550942	2.07427
TGGT1_310930	hypothetical protein	0.682257	0.898198	-0.551614	-0.154894
TGGT1_270240	MAG1 protein	0.681814	0.213612	-0.552549	-2.22693
TGGT1_269190	glyceraldehyde-3-phosphate dehydrogenase GAPDH2	0.680893	0.606318	-0.554499	-0.721854
TGGT1_202870	SAP domain-containing protein	0.680412	0.11847	-0.555521	-3.07741
TGGT1_244650	putative eukaryotic initiation factor-5	0.680398	0.733702	-0.555549	-0.446734
TGGT1_209280	hypothetical protein	0.679857	0.452074	-0.556697	-1.14537
TGGT1_210840	arginyl-tRNA synthetase family protein	0.677619	0.632396	-0.561454	-0.6611
TGGT1_310640	phosphorylase family protein	0.676557	0.202076	-0.563717	-2.30703
TGGT1_319870	ubiquitin-conjugating enzyme subfamily protein	0.67367	0.272107	-0.569886	-1.87776
TGGT1_312110	apicoplast-associated thioredoxin family protein Atrx1	0.671849	0.283269	-0.57379	-1.81976
TGGT1_319500	hypothetical protein	0.667527	0.970229	-0.583101	-0.0436028
TGGT1_288500	FAD Malate-dehydrogenase (MDH-FAD)	0.667459	0.618201	-0.583249	-0.693852
TGGT1_259990	SAC3/GANP family protein	0.666893	0.697893	-0.584474	-0.518922
TGGT1_286590	microtubule associated protein SPM2	0.664458	0.762661	-0.589751	-0.390887
TGGT1_215740	putative notchless	0.664328		-0.590033
TGGT1_254720	dense granule protein GRA8	0.66249	0.888239	-0.59403	-0.170979
TGGT1_253800	putative ribosomal protein L15	0.662387	1.2565	-0.594254	0.329413
TGGT1_206670	hypothetical protein	0.660659	0.529002	-0.598023	-0.918654
TGGT1_232350	lactate dehydrogenase LDH1	0.658043	0.779141	-0.603745	-0.360043
TGGT1_214490	peptidase M16 inactive domain-containing protein	0.653397		-0.613968
TGGT1_321450	Myb family DNA-binding domain-containing protein	0.651336	0.848937	-0.618525	-0.236271
TGGT1_261440	ARM repeats containing protein	0.650497	0.327477	-0.620385	-1.61054
TGGT1_264610	RNA recognition motif-containing protein	0.649719	0.0603031	-0.622111	-4.05162
TGGT1_214575	hypothetical protein	0.648976	0.501216	-0.623763	-0.996496
TGGT1_241240	hypothetical protein	0.647181	0.436147	-0.627758	-1.19711
TGGT1_221320	acetyl-CoA carboxylase ACC1	0.646537	0.420078	-0.629196	-1.25127
TGGT1_273520	PCI domain-containing protein	0.646068	0.671417	-0.630241	-0.574719
TGGT1_209910	histone H2Bv	0.644315	0.669445	-0.634161	-0.578962
TGGT1_320480	Rab11b	0.64323	1.43507	-0.636592	0.521121
TGGT1_207710	putative phosphatidylinositol synthase	0.643114		-0.636853
TGGT1_244200	putative 2-oxoglutarate dehydrogenase e1 component, mitochondrial precursor	0.640741	0.304318	-0.642187	-1.71635
TGGT1_291960	rhoptry kinase family protein ROP40 (incomplete catalytic triad)	0.636173	0.4474	-0.652508	-1.16036
TGGT1_235402	CorA family Mg2+ transporter protein	0.633611	0.800489	-0.658331	-0.321046
TGGT1_229360	transaldolase	0.632441	0.832776	-0.660998	-0.263999
TGGT1_288360	tryptophanyl-tRNA synthetase (TrpRS2)	0.631339	0.681226	-0.663514	-0.553794
TGGT1_311290	protein tyrosine phosphatase family protein, ptpla protein	0.628663	0.728255	-0.66964	-0.457484
TGGT1_215060	putative small GTP-binding protein sar1	0.627533	2.0572	-0.672237	1.04068
TGGT1_310370	hypothetical protein	0.625404	0.447383	-0.677139	-1.16042
TGGT1_223940	GAP45 protein	0.623246	0.676617	-0.682126	-0.563589	GAP45
TGGT1_216650	S15 sporozoite-expressed protein, Msc1a	0.616988	0.111291	-0.696685	-3.16759	Msc1a
TGGT1_298610	GYF domain-containing protein	0.615647		-0.699824
TGGT1_260380	hypothetical protein	0.614291	0.382492	-0.703006	-1.3865
TGGT1_319920	2-oxo acid dehydrogenases acyltransferase (catalytic domain) domain-containing protein	0.612956	0.268923	-0.706146	-1.89474
TGGT1_320140	putative ubiquinol-cytochrome c reductase hinge protein	0.612854	1.48396	-0.706386	0.569452
TGGT1_235540	putative eukaryotic initiation factor-2 beta	0.611963	0.0729359	-0.708484	-3.77723
TGGT1_207760	DnaJ C terminal region domain-containing protein	0.611804		-0.708858
TGGT1_216590	HEAT repeat-containing protein	0.611605	1.1289	-0.709328	0.174914
TGGT1_223490	hypothetical protein	0.610154	1.28849	-0.712755	0.365676
TGGT1_232410	PDI family protein	0.609962	0.360001	-0.713208	-1.47393
TGGT1_310030	putative cyclase-associated protein	0.608123	0.143752	-0.717565	-2.79834
TGGT1_319950	putative rRNA-processing protein FCF1	0.608099	0.817738	-0.717622	-0.29029
TGGT1_245550	hypothetical protein	0.608013	1.03515	-0.717825	0.0498425
TGGT1_315620	putative vacuolar ATP synthase subunit C	0.607819	1.09304	-0.718286	0.128341
TGGT1_261510	hypothetical protein	0.607217	0.346801	-0.719716	-1.52782
TGGT1_271050	SAG-related sequence SRS34A	0.601977	0.827326	-0.73222	-0.273473
TGGT1_272290	pyruvate dehydrogenase complex subunit PD-HE1Beta	0.59722	0.629313	-0.743666	-0.668151
TGGT1_289760	hypothetical protein	0.597083	0.305276	-0.743996	-1.71182
TGGT1_291300	putative RER1 protein	0.58776	0.785485	-0.7667	-0.348345
TGGT1_233460	SAG-related sequence SRS29B	0.586702	0.938188	-0.769301	-0.0920508
TGGT1_249780	hypothetical protein	0.584686	0.103298	-0.774265	-3.27511
TGGT1_220100	phosphoribosylpyrophosphate synthetase	0.582927	0.718896	-0.778612	-0.476144
TGGT1_238950	putative fatty acyl-CoA desaturase	0.577998	2.43732	-0.790864	1.28529
TGGT1_270360	hypothetical protein	0.576248	0.296792	-0.795238	-1.75247
TGGT1_205700	cyclophilin precursor	0.57161	0.183551	-0.806898	-2.44575
TGGT1_237820	IMC sub-compartment protein ISP2	0.571543	0.370637	-0.807067	-1.43192	ISP2
TGGT1_223485	hypothetical protein	0.566375	0.435318	-0.820169	-1.19986
TGGT1_271390	hypothetical protein	0.565257	0.759125	-0.823022	-0.397591
TGGT1_266080	hypothetical protein	0.564709	0.412537	-0.824419	-1.27741
TGGT1_315320	SAG-related sequence SRS52A	0.562817	1.01947	-0.829261	0.0278215
TGGT1_238410	hypothetical protein	0.562081	2.6309	-0.831151	1.39556
TGGT1_262050	rhoptry kinase family protein ROP39	0.560068	0.713157	-0.836326	-0.487709
TGGT1_254330	lipase	0.558796	0.182847	-0.839605	-2.45129
TGGT1_226730	aconitate hydratase ACN/IRP	0.552573		-0.855764
TGGT1_288270	hypothetical protein	0.546977	0.662966	-0.870449	-0.592994
TGGT1_297470	putative myosin light chain 2	0.546122	0.340811	-0.872706	-1.55296
TGGT1_361650	proteasome/cyclosome repeat protein	0.542033	0.589297	-0.883547	-0.762932
TGGT1_224580	RNA recognition motif-containing protein	0.541351	0.667394	-0.885364	-0.583389
TGGT1_300200	histone H2AZ	0.540962	0.551762	-0.8864	-0.857882
TGGT1_209210	hypothetical protein	0.539783	1.09605	-0.88955	0.132313
TGGT1_213280	SAG-related sequence SRS25	0.536183	0.742372	-0.899201	-0.429785
TGGT1_273960	chaperonin GroS protein	0.534847	0.383158	-0.902802	-1.38399
TGGT1_204050	subtilisin SUB1	0.534405	0.505799	-0.903995	-0.983363
TGGT1_249270	putative protein disulfide isomerase-related protein (provisional)	0.534097	0.635964	-0.904827	-0.652983
TGGT1_265360	hypothetical protein	0.532856	1.21236	-0.908182	0.277818
TGGT1_288530	NOL1/NOP2/sun family protein	0.531645	0.167228	-0.911466	-2.58011
TGGT1_236580	Prp31-15.5k-U4 Snrna Complex family protein	0.529849	0.504704	-0.916347	-0.986491
TGGT1_243730	rhoptry protein ROP9	0.526979	0.396795	-0.924183	-1.33354
TGGT1_229010	rhoptry neck protein RON4	0.525025	0.84204	-0.929542	-0.24804
TGGT1_319560	microneme protein MIC3	0.52076	0.0642459	-0.941311	-3.96025
TGGT1_275440	dense granule protein GRA6	0.519188	0.535669	-0.945672	-0.900587
TGGT1_205680	hypothetical protein	0.518668	1.59945	-0.947118	0.677579
TGGT1_312960	hypothetical protein	0.517691	0.960685	-0.949836	-0.0578644
TGGT1_237010	hypothetical protein	0.515844	1.58152	-0.954992	0.661308
TGGT1_203080	RNA recognition motif-containing protein	0.510587	1.03516	-0.96977	0.0498565
TGGT1_246540	cytochrome c1, heme protein	0.509662	2.58583	-0.972387	1.37063
TGGT1_209755B	hypothetical protein	0.505418	0.371879	-0.984452	-1.42709
TGGT1_258390	putative DnaJ protein	0.501529		-0.995595
TGGT1_264660	SAG-related sequence SRS44	0.498593		-1.00407
TGGT1_224240	protein phosphatase 2C domain-containing protein	0.495526	0.465481	-1.01297	-1.10321
TGGT1_310780	dense granule protein GRA4	0.493657	0.446606	-1.01842	-1.16293
TGGT1_316255	hypothetical protein	0.486892	0.464323	-1.03833	-1.1068
TGGT1_308840	SAG-related sequence SRS51	0.486767	0.791371	-1.0387	-0.337575
TGGT1_230050	putative 50S ribosomal protein L3	0.477651	1.16857	-1.06597	0.224748
TGGT1_311240	putative DnaJ family chaperone	0.47516		-1.07351
TGGT1_311480	hypothetical protein	0.472115		-1.08279
TGGT1_211680	protein disulfide isomerase	0.461849	0.286589	-1.11451	-1.80295
TGGT1_203310	dense granule protein GRA7	0.459802	0.613724	-1.12092	-0.704339
TGGT1_237250	hypothetical protein	0.449537	0.768252	-1.15349	-0.380348
TGGT1_218820	alba 2	0.448707	0.685121	-1.15615	-0.545569
TGGT1_245470	mitotic checkpoint protein, BUB3 family protein	0.443968	0.206469	-1.17147	-2.27601
TGGT1_313410	proteasome 26S regulatory subunit	0.441066	1.33715	-1.18093	0.419159
TGGT1_297810	hypothetical protein	0.43632	2.23528	-1.19654	1.16045
TGGT1_318310	transketolase	0.412506	0.346244	-1.27751	-1.53014
TGGT1_306400	hypothetical protein	0.407323	0.304048	-1.29576	-1.71763
TGGT1_241170	hypothetical protein	0.403883	0.545516	-1.30799	-0.874306
TGGT1_209950	putative thioredoxin	0.401072	0.60373	-1.31807	-0.728025
TGGT1_201780	microneme protein MIC2	0.397792	0.326869	-1.32992	-1.61321
TGGT1_249570	hypothetical protein	0.397351	1.20021	-1.33151	0.263287
TGGT1_214080	toxofilin	0.396983	0.358919	-1.33285	-1.47827
TGGT1_268590	rhomboid protease ROM4	0.394968	0.546711	-1.34019	-0.87115
TGGT1_259040	hypothetical protein	0.392748	0.382115	-1.34833	-1.38792
TGGT1_236130	signal recognition particle (SRP9) domain-containing protein	0.387108	0.190557	-1.36919	-2.39171
TGGT1_280560	selenide, water dikinase	0.387035	0.633087	-1.36946	-0.659525
TGGT1_244460	hypothetical protein	0.37352	0.925824	-1.42074	-0.111191
TGGT1_293510	poly(ADP-ribose) polymerase and DNA-Ligase Zn-finger region domain-containing protein	0.366922	0.174865	-1.44646	-2.51568
TGGT1_255420	hypothetical protein	0.364613	0.923531	-1.45556	-0.114768
TGGT1_227810	rhoptry kinase family protein ROP11 (incomplete catalytic triad)	0.364604	0.597438	-1.4556	-0.743138
TGGT1_225930	triose-phosphate isomerase TPI-I	0.353499	0.402752	-1.50022	-1.31204
TGGT1_222300	hypothetical protein	0.345383	1.13992	-1.53373	0.188932
TGGT1_227620	dense granule protein GRA2	0.340408	0.383101	-1.55466	-1.3842
TGGT1_256970	putative vacuolar ATP synthase subunit A	0.334709	0.926801	-1.57902	-0.109669
TGGT1_216450	peptidase, T1 family protein	0.334362	0.551463	-1.58052	-0.858663
TGGT1_293280	cyclin protein	0.314223	0.445334	-1.67014	-1.16704
TGGT1_262960	putative U1 snRNP-associated protein Usp106	0.276026	0.227545	-1.85712	-2.13578
TGGT1_205250	rhoptry protein ROP18	0.276018	0.135886	-1.85717	-2.87953
TGGT1_310860	U5 snRNP-specific protein	0.271592	0.820168	-1.88049	-0.286008
TGGT1_306895	hypothetical protein	0.270253		-1.88762
TGGT1_288750	ubiquinol-cytochrome c reductase	0.265726	0.531095	-1.91199	-0.912959
TGGT1_310210	hypothetical protein	0.252441	0.364654	-1.98598	-1.4554
TGGT1_254580	UDP-galactose transporter family protein	0.235966	0.359563	-2.08335	-1.47568
TGGT1_219550	dihydrolipoyllysine-residue succinyltransferase component of oxoglutarate dehydrogenase	0.23214	0.384495	-2.10693	-1.37896
TGGT1_233110	IMP dehydrogenasa	0.227022	0.922841	-2.13909	-0.115846
TGGT1_242380	fatty acid elongase	0.22053	0.196143	-2.18095	-2.35002
TGGT1_218840	mutS domain protein	0.218773	0.703265	-2.19249	-0.50786
TGGT1_270070	synaptobrevin family protein	0.203902	0.578149	-2.29406	-0.790487
TGGT1_240860	acyltransferase domain-containing protein	0.166446	0.104953	-2.58687	-3.25218
TGGT1_227948	peptidase M16 inactive domain-containing protein	0.162371		-2.62264
TGGT1_411630	disulfide-isomerase domain protein	0.155542	0.888042	-2.68463	-0.1713
TGGT1_238040B	protein disulfide-isomerase domain-containing protein	0.155542	0.888042	-2.68463	-0.1713
TGGT1_238040A	protein disulfide-isomerase domain-containing protein	0.155542	0.888042	-2.68463	-0.1713
TGGT1_286450	dense granule protein GRA5	0.100845	0.0833473	-3.30979	-3.58472
TGGT1_217688	hypothetical protein	0.0706452		-3.82326
TGGT1_268950	hypothetical protein	0.0147333		-6.08477
TGGT1_222160	aldehyde dehydrogenase		1000		9.96578
TGGT1_314260	hypothetical protein		1000		9.96578
TGGT1_293050	sybindin family protein		1000		9.96578
TGGT1_201150	heavy metal translocating P-type ATPase subfamily protein		1000		9.96578
TGGT1_203610	putative 3'-5' exoribonuclease csl4		1000		9.96578
TGGT1_205580	nuclear factor NF4		1000		9.96578
TGGT1_238940	putative GDP mannose 4,6-dehydratase		1000		9.96578
TGGT1_232600	phospholipase, patatin family protein		1000		9.96578
TGGT1_264860	zinc finger, C3HC4 type (RING finger) domain-containing protein		1000		9.96578
TGGT1_201880	hypothetical protein		12.9855		3.69883
TGGT1_258050	actin like protein ALP2a		1.87141		0.904125
TGGT1_321680	hypothetical protein		1.59616		0.674607
TGGT1_268650	putative chaperone clpB protein		1.1534		0.205889
TGGT1_248320	carrier superfamily protein		1.09274		0.127953
TGGT1_286730	SRP19 protein		1.08367		0.115924
TGGT1_255350	putative ATPase		0.968707		-0.0458674
TGGT1_309265	oxidoreductase, short chain dehydrogenase/reductase family protein		0.951835		-0.0712166
TGGT1_315810	tRNA nucleotidyltransferase/poly(A) polymerase family protein		0.912319		-0.13239
TGGT1_204340	hypothetical protein		0.887653		-0.171933
TGGT1_214260	putative alpha-glucan water dikinase 1		0.856484		-0.223501
TGGT1_201840	aspartyl protease ASP1		0.793105		-0.334417
TGGT1_213392	surface antigen repeat-containing protein		0.673375		-0.570517
TGGT1_321420	kelch repeat-containing protein		0.633393		-0.658828
TGGT1_239740	dense granule protein GRA14		0.609268		-0.714851
TGGT1_305920	endonuclease III family 1 protein		0.468912		-1.09261
TGGT1_291890	microneme protein MIC1		0.0122118		-6.35557

## Sheet: common
Accession	Description	Abundance Ratio: (MyoJ-1+ Biotin) / (KU+Biotin)	Abundance Ratio: (MyoJ-2+Biotin) / (KU+Biotin)	log2 (ratio S1)	log2 (ratio S2)	Name
TGGT1_275350	TBC domain-containing protein	1000	1000	9.96578	9.96578
TGGT1_245560	hypothetical protein	1000	1000	9.96578	9.96578				known basal pole protein
TGGT1_202550	NLI interacting factor family phosphatase	1000	1000	9.96578	9.96578	BCC6
TGGT1_269885B	rhoptry metalloprotease toxolysin TLN1	1000	1000	9.96578	9.96578				bait
TGGT1_288600	WD domain, G-beta repeat-containing protein	1000	1000	9.96578	9.96578
TGGT1_206300	hypothetical protein	1000	1000	9.96578	9.96578				IMC proteins
TGGT1_247260	hypothetical protein	1000	1000	9.96578	9.96578
TGGT1_252510	hypothetical protein	1000	1000	9.96578	9.96578				investigated candidates
TGGT1_300120	aminotransferase, class V superfamily protein	1000	1000	9.96578	9.96578
TGGT1_278975	ICE family protease (caspase) p20 domain-containing protein	1000	1000	9.96578	9.96578				ratio >2 or log2(ratio)>1
TGGT1_224530	alveolin domain containing intermediate filament IMC5	1000	1000	9.96578	9.96578	IMC5
TGGT1_244380	cactin	1000	1000	9.96578	9.96578
TGGT1_273050	hypothetical protein	1000	1000	9.96578	9.96578	BCC8
TGGT1_226220	alveolin domain containing intermediate filament IMC9	1000	1000	9.96578	9.96578	IMC9
TGGT1_224520	alveolin domain containing intermediate filament IMC8	1000	1000	9.96578	9.96578	IMC8
TGGT1_278130	hypothetical protein	1000	1000	9.96578	9.96578	BCC11
TGGT1_229280	hypothetical protein	1000	1000	9.96578	9.96578
TGGT1_218720	calcium-dependent protein kinase CDPK6	1000	1000	9.96578	9.96578	CDPK6
TGGT1_247770	hypothetical protein	1000	1000	9.96578	9.96578
TGGT1_223420	DnaJ domain-containing protein	1000	1000	9.96578	9.96578
TGGT1_313100	signal recognition particle SRP54 protein	1000	1000	9.96578	9.96578
TGGT1_226790	ABC transporter, ATP-binding domain-containing protein	1000	1000	9.96578	9.96578
TGGT1_215380	hypothetical protein	1000	1000	9.96578	9.96578	C1
TGGT1_209850	RNA recognition motif-containing protein	1000	1000	9.96578	9.96578
TGGT1_236850	hypothetical protein	1000	1000	9.96578	9.96578
TGGT1_261500	hydrolase	1000	1000	9.96578	9.96578
TGGT1_285220	CAP-Gly domain-containing protein	1000	1000	9.96578	9.96578
TGGT1_233010	putative cell-cycle-assocaited protein kinase ERK7	1000	1000	9.96578	9.96578	ERK7
TGGT1_219190	nuclear movement protein domain containing protein	1000	1000	9.96578	9.96578
TGGT1_231480	putative GCN1	1000	1000	9.96578	9.96578
TGGT1_250730	putative 60S ribosomal protein L7-B	1000	1000	9.96578	9.96578
TGGT1_221390	hypothetical protein	1000	1000	9.96578	9.96578
TGGT1_294640	ribonucleoside-diphosphate reductase large chain	1000	1000	9.96578	9.96578
TGGT1_227450	hydrolase, NUDIX family protein	1000	1000	9.96578	9.96578
TGGT1_264030	putative aminotransferase	1000	1000	9.96578	9.96578
TGGT1_202300	putative inosine triphosphate pyrophosphatase	1000	1000	9.96578	9.96578
TGGT1_206690	glideosome-associated protein with multiple-membrane spans GAPM2B	1000	1000	9.96578	9.96578	GAPM2B
TGGT1_254400	putative LSU ribosomal protein L2P	1000	1000	9.96578	9.96578
TGGT1_284620	hypothetical protein	1000	1000	9.96578	9.96578
TGGT1_270960	hypothetical protein	1000	1000	9.96578	9.96578
TGGT1_216900	cytokine induced apoptosis inhibitor 1 family protein	1000	1000	9.96578	9.96578
TGGT1_291820	RNA helicase (UPF2 interacting domain) protein	1000	1000	9.96578	9.96578
TGGT1_255880	hypothetical protein	1000	1000	9.96578	9.96578
TGGT1_244420	hypothetical protein	1000	1000	9.96578	9.96578
TGGT1_289540	hypothetical protein	1000	1000	9.96578	9.96578
TGGT1_257470	myosin J	692.214	922.413	9.43507	9.84927	MyoJ
TGGT1_232780	hypothetical protein	269.313	619.714	8.07314	9.27546	BCC1
TGGT1_310440	membrane occupation and recognition nexus protein MORN1	74.3925	180.023	6.21709	7.49204	MORN1
TGGT1_269460	Ser/Thr phosphatase family protein	27.1903	86.4839	4.76502	6.43436	BCC5
TGGT1_230340	hypothetical protein	27.7545	70.2862	4.79465	6.13517
TGGT1_311230	hypothetical protein	23.249	61.5712	4.5391	5.94418	BCC7
TGGT1_233680	nuclear movement family protein	38.1233	46.6999	5.2526	5.54535
TGGT1_231070	protein kinase	13.9667	36.9153	3.80392	5.20615	BCC2
TGGT1_250340	centrin 2	75.8781	30.4822	6.24561	4.92989	CEN2
TGGT1_310220	hypothetical protein	16.3637	26.89	4.03243	4.749	BCC10
TGGT1_272640	putative eukaryotic initiation factor-2B, epsilon subunit	20.6371	25.203	4.36717	4.65553
TGGT1_268630	YagE family protein	27.4409	24.7306	4.77826	4.62822
TGGT1_293180	NADP-specific glutamate dehydrogenase	18.5855	22.2153	4.21611	4.47348
TGGT1_209420	hypothetical protein	26.2389	20.2651	4.71363	4.34093	C2
TGGT1_244840	zinc knuckle domain-containing protein	6.01138	17.2365	2.5877	4.10739
TGGT1_205320	hypothetical protein	12.1525	16.8288	3.60318	4.07286
TGGT1_301130	hypothetical protein	0.763165	14.9606	-0.389933	3.9031
TGGT1_216810	5'-nucleotidase, C-terminal domain-containing protein	13.8825	14.4446	3.79519	3.85246
TGGT1_273905	hypothetical protein	8.03661	11.2988	3.00659	3.4981	C3
TGGT1_315920	DNA-directed RNA polymerase II RPB11A	17.8582	10.8582	4.15851	3.44072
TGGT1_288800	endonuclease/exonuclease/phosphatase family protein	9.74349	10.0938	3.28444	3.3354
TGGT1_260320	Noc2p family protein	16.0262	9.57664	4.00236	3.25952
TGGT1_283850	peptidyl-prolyl cis-trans isomerase	6.63622	9.52679	2.73036	3.25199
TGGT1_242830	putative XRN 5'-3' exonuclease	12.1417	9.11118	3.6019	3.18764
TGGT1_264040	hypothetical protein	1.70613	8.68402	0.770729	3.11836
TGGT1_205130	hypothetical protein	6.21358	8.60093	2.63542	3.10449
TGGT1_253470	alveolin domain containing intermediate filament IMC13	5.96002	8.55227	2.57532	3.09631	IMC13
TGGT1_296010	phosphatidylinositol 3- and 4-kinase	8.48876	8.02858	3.08555	3.00515
TGGT1_321620	dynamin-related protein DRPB	8.34692	8.00102	3.06124	3.00018	DRPB
TGGT1_286770	hypothetical protein	1.13172	7.93784	0.178522	2.98875
TGGT1_270250	dense granule protein GRA1	2.39065	7.68157	1.2574	2.9414	GRA1
TGGT1_229650	josephin protein	6.7953	6.91722	2.76454	2.79019
TGGT1_267500	hypothetical protein	6.98866	6.66039	2.80502	2.73561	CBAP/SIP
TGGT1_214180	ENTH domain-containing protein	10.4825	6.64361	3.38991	2.73197
TGGT1_214240	bromodomain-containing protein	2.03358	6.5581	1.02402	2.71328
TGGT1_220270	alveolin domain containing intermediate filament IMC6	8.64549	6.33019	3.11195	2.66225	IMC6
TGGT1_207060	ribonucleoside-diphosphate reductase small subunit	7.20831	5.98107	2.84966	2.5804
TGGT1_301120	acetyl-CoA acetyltransferase	2.60698	5.96263	1.38238	2.57595
TGGT1_232830	putative vacuolar proton translocating ATPase subunit A	1.14716	5.82797	0.198067	2.54299
TGGT1_313670	adaptin n terminal region domain-containing protein	5.00137	5.64367	2.32232	2.49663
TGGT1_235340	hypothetical protein	11.0804	5.62664	3.46993	2.49227
TGGT1_230850	hypothetical protein	4.79018	5.56305	2.26008	2.47588
TGGT1_291180	hypothetical protein	9.59735	5.28723	3.26264	2.40251
TGGT1_260540	alveolin domain containing intermediate filament IMC14	4.64572	4.7847	2.2159	2.25843	IMC14
TGGT1_313860	regulator of chromosome condensation (RCC1) repeat-containing protein	1.49001	4.76128	0.575319	2.25135
TGGT1_233720	DNA-directed RNA polymerase II RPBABC8	6.12186	4.70801	2.61397	2.23512
TGGT1_314100	tetratricopeptide repeat-containing protein	3.30114	4.5713	1.72296	2.1926
TGGT1_267050	hydrolase, alpha/beta fold family protein	4.4586	4.54264	2.15659	2.18353
TGGT1_232340	protein phosphatase 2C domain-containing protein	9.20426	4.43977	3.2023	2.15048
TGGT1_251850	serine/threonine protein phosphatase	1.90746	4.25866	0.931649	2.0904	AC6
TGGT1_230210	alveolin domain containing intermediate filament IMC10	6.45052	4.21902	2.68942	2.07691	IMC10
TGGT1_259010	putative vacuolar ATP synthase subunit d	0.682574	4.21133	-0.550942	2.07427
TGGT1_277260	hypothetical protein	3.21843	4.14704	1.68636	2.05208
TGGT1_221570	putative pre-rRNA-processing protein	2.4586	4.12892	1.29784	2.04576
TGGT1_214270	putative translation initiation factor IF-2	4.66922	3.99429	2.22318	1.99794
TGGT1_200460	hypothetical protein	2.96427	3.6836	1.56768	1.88112
TGGT1_289600	heat shock protein HSP29	4.43549	3.66351	2.14909	1.87323	HSP29
TGGT1_290720	putative vacuolar proton translocating ATPase subunit	0.707975	3.48947	-0.498229	1.80301
TGGT1_219270	multi-pass transmembrane protein GAPM2a	1.98477	3.46859	0.98897	1.79435	GAPM2a
TGGT1_225790	PDI family protein	2.83102	3.34175	1.50132	1.7406
TGGT1_289380	hypothetical protein	1.61604	3.21833	0.69246	1.68631
TGGT1_260600	Pumilio-family RNA binding repeat-containing protein	3.38355	3.21187	1.75854	1.68341
TGGT1_262940	putative aspartyl proteinase (eimepsin)	3.87893	3.15772	1.95566	1.65888
TGGT1_279340	hypothetical protein	0.767112	3.10313	-0.38249	1.63372
TGGT1_258410	photosensitized INA-labeled protein PHIL1	2.25646	3.10244	1.17406	1.6334	PHIL1
TGGT1_309560	nmda receptor glutamate-binding chain	0.818571	3.07465	-0.288821	1.62042
TGGT1_229670	ribosomal protein RPS23	0.985096	3.0483	-0.0216637	1.60801
TGGT1_203390	CRAL/TRIO domain-containing protein	1.90524	3.01835	0.929975	1.59376
TGGT1_256760	pyruvate kinase PyK1	2.05283	2.99167	1.03761	1.58095
TGGT1_233020	Not1 N-terminal domain, CCR4-Not complex component protein	3.19386	2.9413	1.6753	1.55646
TGGT1_216050	tetratricopeptide repeat-containing protein	2.81654	2.93564	1.49392	1.55367
TGGT1_238190	DNA-directed RNA polymerase II RPB3	3.76097	2.92616	1.91111	1.54901
TGGT1_286750	MA3 domain-containing protein	1.78363	2.79184	0.834813	1.48121
TGGT1_265830	phosphodiesterase/alkaline phosphatase D family protein	2.73477	2.66561	1.45142	1.41446
TGGT1_291140	CCR4-Not complex component, Not1 protein	2.48953	2.64307	1.31587	1.40221
TGGT1_238410	hypothetical protein	0.562081	2.6309	-0.831151	1.39556
TGGT1_320220	putative ubiquinol cytochrome c oxidoreductase	0.888702	2.62513	-0.170229	1.39239
TGGT1_248670	V-type H(+)-translocating pyrophosphatase VP1	1.02289	2.60648	0.0326563	1.3821
TGGT1_280370	hypothetical protein	3.05992	2.58666	1.61349	1.37109
TGGT1_246540	cytochrome c1, heme protein	0.509662	2.58583	-0.972387	1.37063
TGGT1_205380	fructose-bisphospatase I	2.32206	2.58335	1.2154	1.36924
TGGT1_291310	putative V-ATPase subunit c' proteolipid	0.812789	2.57849	-0.299047	1.36653
TGGT1_294360	putative ubiquitin specific protease 39 isoform 2	1.86897	2.57724	0.902241	1.36583
TGGT1_257290	RNA 2'-phosphotransferase, Tpt1/KptA family protein	2.19677	2.53167	1.13538	1.34009
TGGT1_259660	orotate phosphoribosyltransferase	1.75193	2.52731	0.808945	1.3376
TGGT1_247460	proliferating cell nuclear antigen PCNA1	1.29917	2.50721	0.377593	1.32609
TGGT1_262640	Cg8 family protein	2.20496	2.48939	1.14075	1.31579
TGGT1_230940	hypothetical protein	2.23793	2.47741	1.16216	1.30884
TGGT1_238950	putative fatty acyl-CoA desaturase	0.577998	2.43732	-0.790864	1.28529
TGGT1_243250	myosin H	0.976493	2.36676	-0.0343189	1.24291
TGGT1_269180	MIF4G domain-containing protein	2.9298	2.349	1.5508	1.23205
TGGT1_310490	ribosomal protein RPL27A	1.18812	2.32618	0.248676	1.21796
TGGT1_250810	ribosomal protein RPL35	1.03324	2.2755	0.047174	1.18619
TGGT1_292130	ribosomal protein RPL13A	1.04601	2.24677	0.0649033	1.16785
TGGT1_265370	hypothetical protein	1.33559	2.24311	0.417481	1.1655
TGGT1_271970	glideosome-associated protein with multiple-membrane spans GAPM3	2.20227	2.23682	1.13899	1.16145	GAPM3
TGGT1_215460	ribosomal protein RPS24	1.27155	2.23557	0.346589	1.16065
TGGT1_297810	hypothetical protein	0.43632	2.23528	-1.19654	1.16045
TGGT1_201700	WD domain, G-beta repeat-containing protein	1.41613	2.19623	0.501952	1.13503
TGGT1_244110	nucleosome assembly protein (nap) protein	1.88361	2.18888	0.9135	1.13019
TGGT1_249950	Mak16 protein	1.07762	2.18737	0.107853	1.1292
TGGT1_242800	putative ribosome biogenesis protein NSA2	0.821598	2.16161	-0.283496	1.11211
TGGT1_286530	hypothetical protein	1.6629	2.12595	0.733702	1.08811
TGGT1_309190	hypothetical protein	0.943711	2.12342	-0.0835827	1.08639
TGGT1_267400	ribosomal protein RPL32	1.25995	2.12143	0.333366	1.08504
TGGT1_218220	putative cell-cycle-associated protein kinase CDK	1.88075	2.10611	0.911308	1.07458
TGGT1_231630	alveolin domain containing intermediate filament IMC4	3.09163	2.06401	1.62837	1.04545
TGGT1_215060	putative small GTP-binding protein sar1	0.627533	2.0572	-0.672237	1.04068
TGGT1_314430	serine/threonine specific protein phosphatase	1.97164	2.021	0.979398	1.01507
TGGT1_311770	hypothetical protein	1.18756	2.01773	0.247995	1.01273	BCC3
TGGT1_312600	heat shock protein HSP21	2.66314	2.00975	1.41313	1.00702	HSP21
TGGT1_277000	putative transport protein Sec24	3.09475	1.97582	1.62982	0.982454
TGGT1_228470	ribosomal protein RPL15	1.21432	1.96978	0.280149	0.978035
TGGT1_294620	putative eukaryotic initiation factor-3, subunit 8	1.20779	1.96585	0.272372	0.97515
TGGT1_257350	putative eukaryotic translation initiation factor	3.03888	1.95881	1.60354	0.969975
TGGT1_233260	putative GTP-binding protein	0.969684	1.94559	-0.0444139	0.96021
TGGT1_265520	hypothetical protein	1.07217	1.92277	0.10053	0.943183
TGGT1_231160	hypothetical protein	2.3721	1.90858	1.24616	0.932498
TGGT1_313230	eukaryotic initiation factor-2, alpha subunit	1.14075	1.89538	0.189983	0.922487
TGGT1_216260	putative eukaryotic initiation factor-2B, gamma subunit	1.84379	1.89042	0.882676	0.918707
TGGT1_210690	ribosomal protein RPS6	1.10699	1.88982	0.146638	0.918247
TGGT1_236570	lysine decarboxylase family protein	0.840886	1.87683	-0.250018	0.908299
TGGT1_231770	putative alpha-tubulin I	0.899486	1.84962	-0.152827	0.887226
TGGT1_214220	hypothetical protein	1.18536	1.80857	0.245323	0.854847
TGGT1_244310	GTP-binding protein	1.61728	1.80786	0.693566	0.854283
TGGT1_234380	hypothetical protein	0.833118	1.80542	-0.263408	0.852336
TGGT1_272910	T-complex protein 1 delta subunit	1.77407	1.80068	0.82706	0.848542
TGGT1_202500	GAPM1a	1.49611	1.79085	0.581217	0.840648	GAPM1a
TGGT1_229920	hypothetical protein	1.14848	1.78547	0.19972	0.836307
TGGT1_316350	hypothetical protein	0.917369	1.78094	-0.124426	0.83264
TGGT1_293730	DHHC zinc finger domain-containing protein	1.59322	1.77355	0.671943	0.826638	DHHC14
TGGT1_231640	alveolin domain containing intermediate filament IMC1	3.01587	1.7696	1.59257	0.82342	IMC1
TGGT1_227290	histone deacetylase HDAC3	1.02922	1.76825	0.0415516	0.822319
TGGT1_300000	ribosomal protein RPL18	1.01911	1.76155	0.0273125	0.816843
TGGT1_320020	transporter, major facilitator family protein	1.28234	1.75741	0.358781	0.813449
TGGT1_213350	ribosomal protein RPS15	1.02389	1.73395	0.0340568	0.79406
TGGT1_236650	DEAD (Asp-Glu-Ala-Asp) box polypeptide 17	1.49063	1.73088	0.575921	0.791508
TGGT1_242840	membrane protein	1.71205	1.72159	0.775722	0.783745
TGGT1_202620	hypothetical protein	1.90147	1.71874	0.927118	0.78135
TGGT1_288860	RuvB family 2 protein	1.18961	1.71694	0.250488	0.779836
TGGT1_312570	CMGC kinase, MAPK family (ERK) MAPK-1	1.33218	1.7137	0.413789	0.777115
TGGT1_203600	hypothetical protein	3.52357	1.71317	1.81704	0.776669
TGGT1_249530	putative exportin 1	1.46516	1.70817	0.551058	0.772456
TGGT1_209150	non-proton pumping type-II NADH dehydrogenase I	1.13068	1.70712	0.177192	0.771563
TGGT1_313910	RNA recognition motif 2 protein	1.45702	1.70652	0.543024	0.77106
TGGT1_250770	putative eukaryotic initiation factor-4A	1.03629	1.70635	0.0514222	0.77091
TGGT1_313665	hypothetical protein	1.48395	1.69098	0.569447	0.757862
TGGT1_286610	putative ribosomal protein RPS14	0.79923	1.68707	-0.323317	0.754519
TGGT1_223540	importin-beta N-terminal domain-containing protein	1.0129	1.68475	0.0184917	0.752534
TGGT1_214150	putative mitochondrial inner membrane translocase subunit TIM17	0.951254	1.67811	-0.0720979	0.746837
TGGT1_308930	putative 50S ribosomal protein L33	1.054	1.67118	0.075874	0.740869
TGGT1_304710	putative eukaryotic peptide chain release factor	0.919908	1.67075	-0.120439	0.740498
TGGT1_299050	ribosomal protein RPL17	1.02223	1.66122	0.0317236	0.732247
TGGT1_202510	multi-pass transmembrane protein GAPM1B	1.7862	1.65485	0.836895	0.726697	GAPM1B
TGGT1_248390	ribosomal protein RPL26	1.19913	1.64841	0.261985	0.721073
TGGT1_314780	myosin G	1.23545	1.63906	0.305032	0.712867
TGGT1_292950	hypothetical protein	1.34631	1.63583	0.429011	0.710022
TGGT1_263130	putative citrate synthase	2.2978	1.63297	1.20026	0.707499
TGGT1_290910	hypothetical protein	1.02092	1.628	0.0298731	0.703105
TGGT1_262920	trypsin domain-containing protein	0.839198	1.62636	-0.252917	0.701649
TGGT1_219520	histone arginine methyltransferase PRMT1	1.54989	1.62354	0.632167	0.699143
TGGT1_231600	HEAT repeat-containing protein	1.07359	1.61968	0.102444	0.695707
TGGT1_259630	hypothetical protein	1.72565	1.61752	0.787141	0.693782
TGGT1_216790	putative ATP-binding cassette sub-family E member 1	1.29601	1.61213	0.374078	0.688968
TGGT1_257390	ribosome biogenesis GTP-binding protein YsxC protein	0.798423	1.60354	-0.324775	0.681262
TGGT1_308860	hypothetical protein	1.2096	1.60154	0.274529	0.679462
TGGT1_318710	ATP-binding cassette sub-family F member 1	1.98984	1.60098	0.99265	0.67896
TGGT1_289560	RNA recognition motif-containing protein	1.01638	1.59984	0.0234459	0.677924
TGGT1_205680	hypothetical protein	0.518668	1.59945	-0.947118	0.677579
TGGT1_219590	RuvB family 1 protein	1.87019	1.59674	0.903183	0.675132
TGGT1_280660	HECT-domain (ubiquitin-transferase) domain-containing protein	1.22732	1.59534	0.295509	0.673859
TGGT1_237010	hypothetical protein	0.515844	1.58152	-0.954992	0.661308
TGGT1_316400B	alpha tubulin TUBA1	0.918353	1.56604	-0.122879	0.647123
TGGT1_278870	myosin F	1.91262	1.56025	0.935554	0.641773
TGGT1_312480	putative uracil phosphoribosyltransferase FUR1	1.01648	1.55978	0.0235792	0.64134
TGGT1_286620	S1 RNA binding domain-containing protein	0.756897	1.55635	-0.40183	0.638163
TGGT1_314970	root hair defective 3 gtp-binding protein (rhd3) protein	0.945901	1.55606	-0.0802383	0.637897
TGGT1_248340	GTP-binding nuclear protein ran/tc4	0.832729	1.54611	-0.26408	0.628639
TGGT1_294630	hypothetical protein	1.58945	1.52803	0.668524	0.611671
TGGT1_220860	DEAD/DEAH box helicase	1.35778	1.52492	0.441247	0.608735
TGGT1_270530	ubiquitin fusion degradation protein UFD1CY	1.83321	1.51854	0.874369	0.602683
TGGT1_202760	hypothetical protein	1.44597	1.51852	0.53204	0.602666
TGGT1_214090	signal peptidase	1.42672	1.51416	0.512697	0.598518
TGGT1_313390	ribosomal protein RPL6	0.868127	1.5135	-0.204021	0.597891
TGGT1_310350	PGAP1 family protein	1.35101	1.51309	0.434044	0.597495
TGGT1_312630	putative anonymous antigen-1	0.750904	1.50689	-0.4133	0.591574
TGGT1_214430	hypothetical protein	1.25128	1.5004	0.323399	0.585343
TGGT1_232710	ribosomal protein RPS3A	1.21718	1.49872	0.283543	0.58373
TGGT1_231080	ribosomal protein RPL38	0.927137	1.49173	-0.109146	0.576982
TGGT1_291690	hypothetical protein	0.785067	1.48745	-0.349112	0.572838
TGGT1_214320	facilitative glucose transporter GT1	1.38235	1.4855	0.467119	0.570953
TGGT1_320140	putative ubiquinol-cytochrome c reductase hinge protein	0.612854	1.48396	-0.706386	0.569452
TGGT1_231210	sarcalumenin/eps15 family protein	1.63239	1.4832	0.706982	0.56871
TGGT1_277700	putative ribosomal protein S14 precursor	1.10844	1.47671	0.148533	0.562385
TGGT1_266960	beta-tubulin	0.878173	1.47368	-0.187422	0.559423
TGGT1_227030	hypothetical protein	0.983258	1.46353	-0.0243577	0.549448
TGGT1_269980	putative preprotein translocase Sec61	1.54281	1.46068	0.625561	0.546645
TGGT1_289690	glyceraldehyde-3-phosphate dehydrogenase GAPDH1	0.798593	1.45688	-0.324468	0.54288
TGGT1_207840	ribosomal protein RPS17	0.90499	1.4515	-0.144026	0.53754
TGGT1_213830	putative Ufm1-conjugating enzyme 1	1.78543	1.44831	0.836274	0.534367
TGGT1_230420	sarco/endoplasmic reticulum Ca2+-ATPase	1.25783	1.44543	0.33094	0.531503
TGGT1_320480	Rab11b	0.64323	1.43507	-0.636592	0.521121
TGGT1_212310	vacuolar ATP synthetase	0.748927	1.43357	-0.417103	0.51961
TGGT1_313010	DEAD (Asp-Glu-Ala-Asp) box polypeptide DDX6	1.21516	1.425	0.281148	0.510966
TGGT1_221970	hypothetical protein	1.28282	1.42359	0.359322	0.509529
TGGT1_312622	DUF803 domain-containing protein	1.41423	1.42321	0.500019	0.509144
TGGT1_312380	tetratricopeptide repeat-containing protein	1.82541	1.41651	0.868222	0.502345
TGGT1_261570	ribosomal protein RPL7A	0.993375	1.40539	-0.0095897	0.490968
TGGT1_209600	hypothetical protein	1.07905	1.40483	0.109755	0.490394
TGGT1_214750	hypothetical protein	1.44988	1.40007	0.535932	0.485503
TGGT1_250820	hypothetical protein	1.55909	1.3847	0.640703	0.46957
TGGT1_278720	hypothetical protein	1.32319	1.38186	0.404022	0.466617
TGGT1_251500	putative eukaryotic initiation factor-3, subunit 3	1.09704	1.38081	0.133617	0.465519
TGGT1_314070	hypothetical protein	1.18798	1.37949	0.248515	0.464139
TGGT1_233520	ATP-dependent RNA helicase	1.23863	1.37665	0.30875	0.461164
TGGT1_240640	casein kinase I	1.60157	1.3658	0.679489	0.449746
TGGT1_211300	putative DUF74 family protein	0.730325	1.36136	-0.453389	0.445044
TGGT1_243960	nuclear transport factor 2 (ntf2) domain-containing protein	1.28075	1.35327	0.356987	0.436446
TGGT1_222410	hypothetical protein	1.1884	1.35095	0.249017	0.433969
TGGT1_233100	SPFH domain / Band 7 family protein	0.827779	1.3495	-0.272683	0.432423
TGGT1_222380	importin-beta N-terminal domain-containing protein	1.04071	1.34783	0.0575719	0.430637
TGGT1_270380	ribosomal protein RPS13	0.848696	1.34565	-0.23668	0.4283
TGGT1_288380	heat shock protein HSP90	0.941614	1.34385	-0.086792	0.426374
TGGT1_313410	proteasome 26S regulatory subunit	0.441066	1.33715	-1.18093	0.419159
TGGT1_257530	transporter, major facilitator family protein	1.1677	1.33334	0.223664	0.41504
TGGT1_276170	phosphatidylinositol 3- and 4-kinase	1.23605	1.33291	0.305739	0.414581
TGGT1_208540	DEAD/DEAH box helicase domain-containing protein	1.11072	1.33061	0.151501	0.412093
TGGT1_217820	PCI domain-containing protein	1.28798	1.32997	0.365107	0.411397
TGGT1_297430	hypothetical protein	1.31962	1.32823	0.400128	0.409503
TGGT1_204020	ribosomal protein RPL8	1.01964	1.32735	0.0280613	0.408551
TGGT1_213740	hypothetical protein	1.25626	1.32362	0.329138	0.404487
TGGT1_245680	ribosomal protein RPL21	1.12217	1.31799	0.166294	0.398344
TGGT1_232440	Brf1p family coiled coil protein	1.64681	1.31778	0.719671	0.398114
TGGT1_200290	rhomboid protease ROM1	1.08795	1.30706	0.121608	0.386325
TGGT1_222660	leucine rich repeat-containing protein	1.0653	1.3065	0.0912556	0.385706
TGGT1_294898	tetratricopeptide repeat-containing protein	1.69592	1.30608	0.762072	0.385238
TGGT1_233695	hypothetical protein	0.962215	1.30588	-0.0555694	0.385023
TGGT1_266990	beta-COP	0.97249	1.30052	-0.0402441	0.379083
TGGT1_252430	hypothetical protein	0.74238	1.30038	-0.429771	0.378931
TGGT1_249250	ribosomal protein RPL35A	1.02411	1.29827	0.0343707	0.376595
TGGT1_266060	ribosomal protein RPSA	0.988815	1.29522	-0.0162271	0.373202
TGGT1_271888	putative 3-ketoacyl-CoA reductase	1.00923	1.29254	0.0132544	0.370205
TGGT1_236050	putative fructose-bisphosphate aldolase	1.02614	1.28985	0.0372291	0.367198
TGGT1_219720	putative Ras-related protein Rab-5C	1.36127	1.28897	0.444948	0.36622
TGGT1_223490	hypothetical protein	0.610154	1.28849	-0.712755	0.365676
TGGT1_216000	alveolin domain containing intermediate filament IMC3	2.80643	1.28718	1.48873	0.36421	IMC3
TGGT1_255190	myosin C	1.46288	1.2814	0.548808	0.35772	MyoC
TGGT1_244100	snoRNA binding domain-containing protein	0.940867	1.2787	-0.0879369	0.354674
TGGT1_297780	ATPase/histidine kinase/DNA gyrase B/HSP90 domain-containing protein	0.937996	1.271	-0.0923466	0.345964
TGGT1_203490	GNL3L/Grn1 GTPase	1.16344	1.26619	0.218392	0.340495
TGGT1_240690	S-adenosyl methionine synthetase	0.89115	1.26582	-0.16626	0.340069
TGGT1_229930	p25-alpha family protein	1.66845	1.26149	0.738505	0.335133
TGGT1_309570	DEAD/DEAH box helicase domain-containing protein	1.05322	1.25686	0.0748017	0.329823
TGGT1_240810	hypothetical protein	1.24642	1.2568	0.317794	0.329752
TGGT1_295360	hypothetical protein	1.86798	1.25675	0.901475	0.329702
TGGT1_253800	putative ribosomal protein L15	0.662387	1.2565	-0.594254	0.329413
TGGT1_212250	XPG N-terminal domain-containing protein	1.02965	1.25535	0.0421544	0.328091
TGGT1_219800	putative vacuolar ATP synthase subunit b	0.870066	1.25446	-0.200803	0.327065
TGGT1_293380	histone lysine acetyltransferase HAT1	0.913681	1.24904	-0.130238	0.320822
TGGT1_253430	putative asparagine synthetase	0.980594	1.24838	-0.0282717	0.32006
TGGT1_265450	hexokinase	0.917528	1.2481	-0.124176	0.319732
TGGT1_216020	peptidase family c78 protein	1.10525	1.24326	0.144377	0.31413
TGGT1_252290	putative importin alpha	0.95617	1.2408	-0.0646602	0.311269
TGGT1_236040	fructose-1,6-bisphosphate aldolase	1.00508	1.23919	0.00730741	0.309402
TGGT1_277500	putative 26S proteasome regulatory subunit 7	1.18191	1.23863	0.241121	0.308744
TGGT1_215400	RNA recognition motif-containing protein	1.28867	1.23708	0.365879	0.306943
TGGT1_267060	ribosomal protein RPL14	0.716669	1.23597	-0.480621	0.305645
TGGT1_320050	ribosomal protein RPL5	0.891863	1.23574	-0.165106	0.30538
TGGT1_201380	putative chorismate synthase	1.64297	1.23121	0.71631	0.300074
TGGT1_211690	AAA family protein	0.773905	1.23032	-0.369771	0.299033
TGGT1_263700	ribosomal protein RPS14	1.09357	1.22749	0.12905	0.295717
TGGT1_309120	ribosomal protein RPL4	1.01431	1.22658	0.0204927	0.294644
TGGT1_225360	hypothetical protein	1.28912	1.2244	0.366381	0.292077
TGGT1_411760	actin	1.58279	1.22336	0.662468	0.290853
TGGT1_235160	hypothetical protein	0.954044	1.22167	-0.0678727	0.288852
TGGT1_294930	leucine rich repeat-containing protein	1.3392	1.22137	0.421373	0.288495
TGGT1_266760	isocitrate dehydrogenase	1.68103	1.22136	0.749345	0.288485
TGGT1_277970	dolichol-phosphate-mannose synthase family protein	1.01921	1.22111	0.0274452	0.288198
TGGT1_266070	ribosomal protein RPL31	0.935291	1.21892	-0.0965126	0.285607
TGGT1_315750	hypothetical protein	1.50524	1.21746	0.589993	0.283873
TGGT1_256770	putative eukaryotic translation initiation factor 4A, isoform 3	1.06872	1.21491	0.0958857	0.280851
TGGT1_262670	ribosomal protein RPL18A	0.983855	1.21326	-0.0234823	0.278888
TGGT1_265360	hypothetical protein	0.532856	1.21236	-0.908182	0.277818
TGGT1_262710	Ctr copper transporter family protein	0.981648	1.20915	-0.0267222	0.273991
TGGT1_324600	heat shock protein	0.806989	1.20724	-0.309378	0.271713
TGGT1_220930	hypothetical protein	1.24603	1.20579	0.317337	0.269983
TGGT1_214840	AP2 domain transcription factor AP2X-7	1.83773	1.2017	0.877926	0.265073
TGGT1_238130	hypothetical protein	0.771388	1.20072	-0.374471	0.263906
TGGT1_249570	hypothetical protein	0.397351	1.20021	-1.33151	0.263287
TGGT1_228210	26S proteasome regulatory subunit	1.04769	1.19941	0.0672168	0.262319
TGGT1_208030	microneme protein MIC4	1.49454	1.19884	0.579705	0.261643
TGGT1_208340	hypothetical protein	1.45622	1.19803	0.54223	0.260668
TGGT1_260610	methyltransferase	1.02478	1.19762	0.0353153	0.260165
TGGT1_297720	trehalose-phosphatase	1.39828	1.19722	0.48365	0.259687
TGGT1_237140	putative ethylene inducible protein	0.935504	1.1906	-0.0961845	0.251687
TGGT1_243910	Cof family hydrolase subfamily protein	0.974007	1.19025	-0.0379957	0.251264
TGGT1_273060	putative ribosomal protein S17	1.49687	1.18968	0.58195	0.250579
TGGT1_215470	ribosomal protein RPL10A	1.02657	1.18845	0.0378366	0.249084
TGGT1_226970	ribosomal protein RPS11	1.02303	1.18735	0.0328495	0.24775
TGGT1_409330	putative polyketide synthase	0.911914	1.18626	-0.133031	0.246426
TGGT1_252630	hypothetical protein	0.998303	1.18117	-0.0024506	0.240211
TGGT1_245460	ribosomal protein RPS8	1.01865	1.17906	0.0266596	0.237638
TGGT1_315930	putative integral membrane protein, DUF56 family protein	0.841413	1.17798	-0.249114	0.236317
TGGT1_232180	UBA/TS-N domain-containing protein	1.15625	1.17414	0.20945	0.23161
TGGT1_232300	ribosomal protein RPS3	1.11645	1.17182	0.158922	0.228755
TGGT1_230050	putative 50S ribosomal protein L3	0.477651	1.16857	-1.06597	0.224748
TGGT1_234450	ribosomal protein RPS15A	0.877786	1.16847	-0.18806	0.224624
TGGT1_258470	hypothetical protein	1.55942	1.16002	0.64101	0.214144
TGGT1_201680	putative eukaryotic initiation factor-3 subunit 10	1.02205	1.15578	0.0314692	0.208866
TGGT1_219790B	pre-mRNA processing factor PRP3	0.972153	1.15543	-0.0407444	0.208433
TGGT1_243950	putative prohibitin	0.910722	1.15536	-0.134918	0.20834
TGGT1_276140	ADP ribosylation factor ARF1	0.77861	1.15519	-0.361027	0.208126
TGGT1_289530	ribosomal protein RPL19	1.01065	1.15194	0.0152817	0.204067
TGGT1_240380	hypothetical protein	0.910122	1.14761	-0.135867	0.198633
TGGT1_227280	dense granule protein GRA3	1.12028	1.14566	0.163863	0.196185
TGGT1_277690	hypothetical protein	0.994228	1.14372	-0.00835175	0.193728
TGGT1_249850	GAP40 protein	1.03448	1.14032	0.0489112	0.189434	GAP40
TGGT1_222300	hypothetical protein	0.345383	1.13992	-1.53373	0.188932
TGGT1_257680	myosin light chain MLC1	0.973789	1.13922	-0.0383184	0.188052	MLC1
TGGT1_290950	putative clathrin heavy chain	0.853232	1.13658	-0.228989	0.184704
TGGT1_216510	putative thioredoxin	1.01568	1.13513	0.0224516	0.182851
TGGT1_217680	hypothetical protein	1.36176	1.13471	0.445475	0.182323
TGGT1_271930	hypothetical protein	1.62724	1.13439	0.702427	0.181921
TGGT1_224480	putative cell-cycle-associated protein kinase CLK	0.766156	1.13262	-0.38429	0.179663
TGGT1_263440	hypothetical protein	0.769841	1.13258	-0.377368	0.179616
TGGT1_239820	D-3-phosphoglycerate dehydrogenase	0.848466	1.13112	-0.237071	0.177754
TGGT1_263870	glutamate-tRNA ligase	0.967621	1.12955	-0.0474854	0.175749
TGGT1_216590	HEAT repeat-containing protein	0.611605	1.1289	-0.709328	0.174914
TGGT1_209030	actin ACT1	0.886908	1.12846	-0.173144	0.174359
TGGT1_318510	putative N-ethylmaleimide-sensitive fusion protein	0.769928	1.12658	-0.377204	0.171952
TGGT1_239790	BRCA1 C Terminus (BRCT) domain-containing protein	1.58815	1.12654	0.667346	0.171897
TGGT1_257340	Ras family protein	0.940175	1.12492	-0.0889984	0.169822
TGGT1_268810	ck2 beta subunit	1.19139	1.12234	0.252646	0.166515
TGGT1_264060	PCI domain-containing protein	1.10881	1.12205	0.149018	0.166136
TGGT1_305820	SGS domain-containing protein	1.43035	1.12093	0.516364	0.164693
TGGT1_263070	CMGC kinase, CK2 family	0.971058	1.12068	-0.0423712	0.164379
TGGT1_207640	isoleucyl-tRNA synthetase family protein	0.928188	1.12062	-0.10751	0.164297
TGGT1_227910	hypothetical protein	0.771078	1.11974	-0.375051	0.163169
TGGT1_313070	hypothetical protein	0.790185	1.11971	-0.339737	0.16313
TGGT1_298630	vacuolar transporter chaperone VTC2	1.08668	1.11956	0.119924	0.162936
TGGT1_231190	arsenite-activated ATPase family protein	1.22193	1.11859	0.289156	0.161677
TGGT1_260180	hypothetical protein	0.769517	1.11812	-0.377974	0.16107
TGGT1_233400	TAF9 RNA polymerase II, TATA box binding protein (TBP)-associated factor isoform 2 family protein	1.0457	1.11673	0.0644699	0.159282
TGGT1_267810	Rab 5	1.22909	1.11657	0.297594	0.159079
TGGT1_221620	putative beta-tubulin	0.875769	1.11534	-0.191378	0.157486
TGGT1_315270	hypothetical protein	1.99709	1.11391	0.9979	0.155629
TGGT1_239400	hypothetical protein	1.25084	1.1061	0.322895	0.145486
TGGT1_218400	NEK kinase	0.874624	1.10488	-0.193266	0.143885
TGGT1_240650	putative coatomer protein complex, subunit alpha	1.04244	1.10416	0.0599599	0.142947
TGGT1_229250A	ribosomal protein RPL28	1.09008	1.10367	0.124431	0.142312
TGGT1_313380	hypothetical protein	1.98705	1.10332	0.990629	0.14185	ILP1
TGGT1_219280	actin like protein ALP1	1.03268	1.10001	0.0463882	0.137519
TGGT1_224850	putative polyadenylate binding protein	1.0764	1.09743	0.10622	0.134127
TGGT1_289830	putative eukaryotic initiation factor-3, delta subunit	1.10274	1.09726	0.141088	0.133903
TGGT1_203240	hypothetical protein	1.28159	1.09694	0.35794	0.133482
TGGT1_209210	hypothetical protein	0.539783	1.09605	-0.88955	0.132313
TGGT1_224220	serine/threonine-protein phosphatase PP2A catalytic subunit	0.80435	1.09523	-0.314104	0.131236
TGGT1_291800	ADP-ribosylation factor family protein	1.033	1.09435	0.0468364	0.130081
TGGT1_286630	redoxin domain-containing protein	1.1038	1.09348	0.142479	0.128925
TGGT1_315620	putative vacuolar ATP synthase subunit C	0.607819	1.09304	-0.718286	0.128341
TGGT1_288650	dense granule protein GRA12	0.969605	1.09069	-0.0445308	0.125246
TGGT1_258070	hypothetical protein	1.25646	1.08814	0.329369	0.121867
TGGT1_232730	acyl-CoA:diacylglycerol acyltransferase 1-related enzyme	1.02221	1.08813	0.0316964	0.121848
TGGT1_311310	protein phosphatase 2B catalytic subunit, calcineurin family phosphatse superfamily protein	1.08231	1.08733	0.114115	0.120792
TGGT1_230160	hypothetical protein	1.21117	1.08721	0.276402	0.120626
TGGT1_203380	DnaJ domain-containing protein	0.980276	1.08674	-0.0287402	0.120011
TGGT1_242030	hypothetical protein	1.00992	1.08508	0.0142385	0.117807
TGGT1_313960	ribosomal protein L19 protein	0.787522	1.08367	-0.344608	0.115932
TGGT1_226710	hypothetical protein	2.49742	1.08084	1.32044	0.112149
TGGT1_202610	protein phosphatase 2C domain-containing protein	1.33314	1.07997	0.414833	0.110987
TGGT1_239760	ribosomal protein RPL22	0.901361	1.07992	-0.149823	0.110924
TGGT1_273760	heat shock protein HSP70	1.38078	1.0796	0.465481	0.110499
TGGT1_250830	SAC3/GANP family protein	0.98879	1.07891	-0.0162637	0.109578
TGGT1_249030	endonuclease/exonuclease/phosphatase family protein	0.871912	1.07677	-0.197745	0.106707
TGGT1_227960	PCI domain-containing protein	0.828739	1.07668	-0.27101	0.106592
TGGT1_274190	putative eukaryotic initiation factor 2B epsilon subunit	1.01778	1.07558	0.02543	0.105112
TGGT1_268200	RNA recognition motif-containing protein	1.21437	1.07303	0.280204	0.101692
TGGT1_267080	putative 26S protease regulatory subunit 4	1.13322	1.07226	0.180422	0.100649
TGGT1_249900	putative adenine nucleotide translocator	0.96288	1.07164	-0.0545719	0.099821
TGGT1_274060	2-oxoglutarate/malate translocase OMT	0.939326	1.06754	-0.0903021	0.0942868
TGGT1_288720	ribosomal protein RPL10	1.10741	1.06692	0.14719	0.093452
TGGT1_273460	eukaryotic translation initiation factor 3 subunit 6 interacting protein	1.00104	1.06637	0.00150187	0.0927148
TGGT1_305520	ribosomal protein RPS2	1.2486	1.0646	0.320314	0.0903163
TGGT1_213790	hypothetical protein	1.11731	1.05862	0.160024	0.0821835
TGGT1_231430	putative oligosaccharyl transferase stt3 protein	1.7407	1.05551	0.799664	0.077936
TGGT1_313240	putative ethylene-responsive RNA helicase	1.23694	1.05305	0.306771	0.0745776
TGGT1_249390	glutamate/leucine/phenylalanine/valine dehydrogenase family protein	1.15131	1.05093	0.203282	0.0716699
TGGT1_252500	polo kinase	0.696774	1.04613	-0.521238	0.0650622
TGGT1_204400	putative ATPase synthase subunit alpha	1.14344	1.04355	0.193382	0.0614962
TGGT1_313270	hypothetical protein	1.19962	1.04339	0.262575	0.0612807
TGGT1_231940	ThiF family protein	1.26095	1.04253	0.334509	0.0600834
TGGT1_291330	RNA recognition motif-containing protein	0.846341	1.04205	-0.240689	0.0594201
TGGT1_226250	DEAD (Asp-Glu-Ala-Asp) box polypeptide DDX3X	1.08694	1.04119	0.120273	0.0582295
TGGT1_315860	EF hand domain-containing protein	0.725583	1.03794	-0.462788	0.0537298
TGGT1_235470	myosin A	0.924975	1.03641	-0.112514	0.0515889
TGGT1_203080	RNA recognition motif-containing protein	0.510587	1.03516	-0.96977	0.0498565
TGGT1_245550	hypothetical protein	0.608013	1.03515	-0.717825	0.0498425
TGGT1_311890	hypothetical protein	1.18834	1.03365	0.248943	0.0477461
TGGT1_202530	aspartate-tRNA ligase	0.778457	1.0296	-0.36131	0.0420878
TGGT1_212240	putative beta-1 tubulin	0.905757	1.02467	-0.142803	0.0351558
TGGT1_289650	PEP-carboxykinase I	1.47664	1.02096	0.562321	0.029921
TGGT1_315320	SAG-related sequence SRS52A	0.562817	1.01947	-0.829261	0.0278215
TGGT1_229140	MaoC family domain-containing protein	1.02739	1.01917	0.038981	0.0273883
TGGT1_221380	alba 1	0.984935	1.01896	-0.0218998	0.0270989
TGGT1_255320	mRNA turnover 4 (MRT4) family protein	1.37986	1.0142	0.464525	0.0203357
TGGT1_267620	multi-pass transmembrane protein	0.90729	1.01418	-0.140364	0.0203161
TGGT1_290900	hydrolase, NUDIX family protein	0.919066	1.00891	-0.12176	0.0127943
TGGT1_270510	asparaginyl-tRNA synthetase (NOB+tRNA synthase)	0.811018	1.00629	-0.302194	0.00904471
TGGT1_239100	ribosomal protein RPS7	1.03972	1.00444	0.0561981	0.00638753
TGGT1_248700	alveolin domain containing intermediate filament IMC12	1.96248	1.00253	0.972679	0.00364994	IMC12
TGGT1_253290	valyl-tRNA synthetase	0.921212	1.00233	-0.118394	0.00336462
TGGT1_254880	Alpha-galactosidase	0.991237	1.00121	-0.0126975	0.00173746
TGGT1_308090	rhoptry protein ROP5	0.982319	1.00109	-0.0257364	0.00156876
TGGT1_226020	transporter, major facilitator family protein	1.05582	1.00089	0.0783695	0.00128978
TGGT1_221522	adaptor complexes medium subunit family protein	0.779968	1.00086	-0.358513	0.001244
TGGT1_208590	putative vacuolar ATP synthase subunit 54kD	0.772231	0.999607	-0.372897	-0.000567641
TGGT1_312200	serine/threonine protein phosphatase	1.2341	0.99905	0.303463	-0.0013706
TGGT1_214210	rRNA pseudouridine synthase	1.23554	0.998865	0.305144	-0.00163869
TGGT1_289680	Ras-related protein Rab11	1.09389	0.998278	0.129468	-0.00248716
TGGT1_257990	putative heat shock protein 101	0.778861	0.996621	-0.360562	-0.00488271
TGGT1_292080	leucyl-tRNA synthetase	0.832198	0.995675	-0.265001	-0.00625369
TGGT1_314810	ribosomal protein RPL7	0.946871	0.994938	-0.0787599	-0.00732177
TGGT1_214350	putative GTP-binding protein	0.839243	0.993096	-0.25284	-0.00999511
TGGT1_217460	glutaminyl-tRNA synthetase (GlnRS)	1.02996	0.993082	0.0425872	-0.0100154
TGGT1_408800	NTPase	0.993961	0.991781	-0.00873892	-0.0119065
TGGT1_218280	putative eukaryotic porin	0.962048	0.990017	-0.0558185	-0.014475
TGGT1_263320	hypothetical protein	0.86	0.988623	-0.217591	-0.016507
TGGT1_235930	domain K- type RNA binding proteins family protein	1.04971	0.987797	0.0699851	-0.0177134
TGGT1_275802	SRP72 RNA-binding domain-containing protein	1.04361	0.987359	0.0615773	-0.0183532
TGGT1_231150	hypothetical protein	1.25638	0.987234	0.32927	-0.0185358
TGGT1_230350	hypothetical protein	1.08128	0.98704	0.112736	-0.0188202
TGGT1_298020	DEAD-family helicase	0.683488	0.986169	-0.549013	-0.0200937
TGGT1_213000	putative replication factor C, subunit 5	0.965037	0.986111	-0.0513434	-0.0201781
TGGT1_238250	ribosomal protein RPL36	1.03316	0.983644	0.047066	-0.0237922
TGGT1_206470	pyruvate dehydrogenase complex subunit PDH-E3II	0.860923	0.979154	-0.216044	-0.0303919
TGGT1_205440	CCT chaperonin gamma subunit	1.31824	0.973941	0.398612	-0.0380936
TGGT1_214790	glycoprotein	1.62019	0.973886	0.696161	-0.0381748
TGGT1_305120	transporter, solute:sodium symporter (SSS) family protein	1.14968	0.972935	0.201233	-0.0395849
TGGT1_223050	ribosomal protein RPS20	0.948341	0.971777	-0.0765229	-0.0413031
TGGT1_310430B	Hsp90 domain-containing protein	0.925149	0.970789	-0.112242	-0.0427702
TGGT1_319500	hypothetical protein	0.667527	0.970229	-0.583101	-0.0436028
TGGT1_230960	putative splicing factor 3b, subunit 3	0.893652	0.968924	-0.162216	-0.0455441
TGGT1_212090	hypothetical protein	0.813722	0.967466	-0.297391	-0.0477169
TGGT1_240870	putative beta adaptin protein	1.34452	0.966366	0.427095	-0.0493578
TGGT1_223410	putative eukaryotic initiation factor-4E	1.02883	0.965824	0.0409991	-0.0501682
TGGT1_300140	putative elongation factor 1-gamma	0.930913	0.965626	-0.103282	-0.0504642
TGGT1_258210	DNA-directed RNA polymerase II RPB2	1.48255	0.963852	0.568085	-0.0531162
TGGT1_266800	putative integral membrane protein	0.899106	0.962518	-0.153436	-0.0551142
TGGT1_312960	hypothetical protein	0.517691	0.960685	-0.949836	-0.0578644
TGGT1_201520	protein phosphatase 2C domain-containing protein	0.816752	0.956869	-0.29203	-0.0636074
TGGT1_290200	NAD/NADP octopine/nopaline dehydrogenase, alpha-helical domain-containing protein	1.03096	0.95444	0.0439859	-0.0672731
TGGT1_290180	AP2 domain transcription factor AP2IX-6	0.786115	0.953991	-0.347187	-0.0679521
TGGT1_257150	NOT2 / NOT3 / NOT5 family protein	1.72511	0.951527	0.786687	-0.0716841
TGGT1_242330	ribosomal protein RPS5	0.938463	0.948746	-0.0916285	-0.0759054
TGGT1_292920	putative heat shock protein 75	1.02653	0.948582	0.0377749	-0.0761555
TGGT1_280610	signal recognition particle receptor alpha subunit	0.889515	0.947397	-0.168908	-0.0779592
TGGT1_210370	hypothetical protein	0.824548	0.94645	-0.278325	-0.0794016
TGGT1_279100	hypothetical protein	0.941294	0.944504	-0.0872823	-0.0823716
TGGT1_229640	hypothetical protein	0.738838	0.943927	-0.43667	-0.0832535
TGGT1_243570	ribosomal protein RPS26	1.07058	0.938961	0.0983946	-0.090863
TGGT1_219850	prolyl-tRNA synthetase (ProRS)	0.721705	0.938784	-0.470518	-0.0911353
TGGT1_244440	nucleoside transporter protein	1.19398	0.938578	0.255773	-0.0914516
TGGT1_233460	SAG-related sequence SRS29B	0.586702	0.938188	-0.769301	-0.0920508
TGGT1_219710	hypothetical protein	2.02237	0.937968	1.01604	-0.09239
TGGT1_235020	putative COPI protein	0.813847	0.935549	-0.29717	-0.096115
TGGT1_273370	putative coatomer gamma 2-subunit protein	1.16205	0.935294	0.216668	-0.0965074
TGGT1_202390	S15 sporozoite-expressed protein	0.780401	0.934081	-0.357712	-0.0983807	Msc1b
TGGT1_222000	brix domain-containing protein	1.10053	0.931111	0.138198	-0.102974
TGGT1_309752	putative succinate-Coenzyme A ligase, beta subunit	0.771812	0.930891	-0.37368	-0.103316
TGGT1_290980	putative glycine C-acetyltransferase	1.22027	0.92987	0.2872	-0.104899
TGGT1_244560	putative heat shock protein 90	0.801187	0.928619	-0.31979	-0.106841
TGGT1_256970	putative vacuolar ATP synthase subunit A	0.334709	0.926801	-1.57902	-0.109669
TGGT1_202680	putative peptidase M16, alpha subunit	0.883276	0.926408	-0.179063	-0.110281
TGGT1_247195	microneme protein MIC15	0.805356	0.926369	-0.312301	-0.110341
TGGT1_244460	hypothetical protein	0.37352	0.925824	-1.42074	-0.111191
TGGT1_305340	corepressor complex CRC230	1.4428	0.924144	0.528872	-0.11381
TGGT1_255420	hypothetical protein	0.364613	0.923531	-1.45556	-0.114768
TGGT1_213910	hypothetical protein	1.01774	0.923464	0.0253646	-0.114872
TGGT1_233110	IMP dehydrogenasa	0.227022	0.922841	-2.13909	-0.115846
TGGT1_219320	acid phosphatase GAP50	0.822228	0.920949	-0.282389	-0.118807	GAP50
TGGT1_247470	putative nucleolar protein	0.930866	0.920822	-0.103354	-0.119006
TGGT1_229260	hypothetical protein	1.1149	0.920745	0.15691	-0.119126	BCC4
TGGT1_209100	PUB domain-containing protein	1.38911	0.920089	0.474158	-0.120154
TGGT1_231120	putative ribosomal protein S11	1.22812	0.917946	0.296455	-0.123519
TGGT1_219630	flavodoxin domain-containing protein	0.880072	0.916439	-0.184307	-0.125888
TGGT1_245670	pyruvate dehydrogenase complex subunit PDH-E1Alpha	0.893376	0.916271	-0.16266	-0.126153
TGGT1_260630	DnaJ family Sec63 protein	0.745728	0.915232	-0.423279	-0.127791
TGGT1_289310	cullin family protein	0.782089	0.914932	-0.354596	-0.128264
TGGT1_258110	N-acetylglucosaminylphosphatidylinositol deacetylase	0.874006	0.91452	-0.194285	-0.128913
TGGT1_207440	ribosomal protein RPS4	1.10657	0.913408	0.146097	-0.130669
TGGT1_203540	putative RNA binding protein	1.67044	0.911862	0.740226	-0.133112
TGGT1_283710	longevity-assurance protein (LAG1) domain-containing protein	0.918079	0.910229	-0.12331	-0.135699
TGGT1_207460B	Rab5B protein	1.04712	0.908685	0.0664218	-0.138148
TGGT1_208790	putative MC family transporter	0.922523	0.908041	-0.116344	-0.139171
TGGT1_214250	hypothetical protein	0.800139	0.907798	-0.321677	-0.139557
TGGT1_222220	alveolin domain containing intermediate filament IMC7	2.1104	0.905661	1.07751	-0.142957	IMC7
TGGT1_289180	putative thioredoxin family redox-active protein	0.951217	0.902514	-0.0721532	-0.147979
TGGT1_247510	fructose-bisphospatase II	0.801918	0.901384	-0.318473	-0.149786
TGGT1_248480	ribosomal protein RPS9	0.923327	0.900034	-0.115087	-0.151948
TGGT1_251880	tRNA synthetases class I family protein	0.864291	0.899668	-0.210411	-0.152535
TGGT1_310930	hypothetical protein	0.682257	0.898198	-0.551614	-0.154894
TGGT1_307850	6-phosphogluconate dehydrogenase	0.74806	0.895799	-0.418774	-0.158753
TGGT1_284050	DEAD/DEAH box helicase domain-containing protein	0.938004	0.89251	-0.0923339	-0.16406
TGGT1_225550	phosphatidylserine decarboxylase	1.05816	0.891929	0.0815519	-0.164999
TGGT1_205350	putative integral membrane protein, GNS1/SUR4 family protein	1.87712	0.889548	0.908522	-0.168856
TGGT1_287500	putative T complex chaperonin	1.03264	0.888414	0.0463395	-0.170695
TGGT1_254720	dense granule protein GRA8	0.66249	0.888239	-0.59403	-0.170979
TGGT1_411630	disulfide-isomerase domain protein	0.155542	0.888042	-2.68463	-0.1713
TGGT1_238040B	protein disulfide-isomerase domain-containing protein	0.155542	0.888042	-2.68463	-0.1713
TGGT1_238040A	protein disulfide-isomerase domain-containing protein	0.155542	0.888042	-2.68463	-0.1713
TGGT1_264840	ATP-dependent DNA helicase, RecQ family protein	0.75801	0.884826	-0.39971	-0.176534
TGGT1_220950	hypothetical protein	1.05018	0.884632	0.0706341	-0.17685
TGGT1_242660	putative vacuolar sorting protein 35	0.838096	0.883828	-0.254812	-0.178163
TGGT1_256990	glycyl-tRNA synthetase	0.842922	0.882992	-0.24653	-0.179528
TGGT1_223390	putative activating signal cointegrator 1 complex subunit 3 family 1 ASCC3L1	0.964278	0.881096	-0.0524786	-0.182629
TGGT1_248880	GTPase RAB7	0.98368	0.878935	-0.0237388	-0.186171
TGGT1_290700	hypothetical protein	0.981614	0.875065	-0.0267726	-0.192538
TGGT1_312050	putative small GTPase Rab2	0.938983	0.873473	-0.0908296	-0.195165
TGGT1_215280	succinate dehydrogenase [ubiquinone] iron-sulfur protein	0.836993	0.872985	-0.256712	-0.195972
TGGT1_288830	NADH dehydrogenase (NDH2-II)	0.790483	0.867032	-0.339194	-0.205842
TGGT1_312090	ribosomal protein RPL23	1.12252	0.866882	0.166743	-0.206093
TGGT1_309820	ribosomal protein RPL11	1.13894	0.862868	0.187693	-0.212788
TGGT1_217890	putative alkyl hydroperoxide reductase/ Thiol specific antioxidant/ Mal allergen	1.12669	0.861316	0.172088	-0.215386
TGGT1_279330	DEAD/DEAH box helicase family protein	0.858024	0.861104	-0.220911	-0.21574
TGGT1_216860	DEAD (Asp-Glu-Ala-Asp) box polypeptide DDX39	0.827674	0.860776	-0.272865	-0.216291
TGGT1_263050	ribosomal protein RPL13	0.935195	0.860733	-0.0966605	-0.216362
TGGT1_231920	oxidoreductase, short chain dehydrogenase/reductase family protein	0.95939	0.859848	-0.0598111	-0.217847
TGGT1_287230	inorganic anion transporter, sulfate permease (SulP) family protein	1.15715	0.8594	0.210576	-0.218598
TGGT1_231140	ribosomal protein RPS25	0.996035	0.849734	-0.00573163	-0.234917
TGGT1_321450	Myb family DNA-binding domain-containing protein	0.651336	0.848937	-0.618525	-0.236271
TGGT1_229010	rhoptry neck protein RON4	0.525025	0.84204	-0.929542	-0.24804
TGGT1_291680	Sec23/Sec24 trunk domain-containing protein	1.07238	0.841259	0.100814	-0.249379
TGGT1_228170	inner membrane complex protein IMC2A	1.0988	0.841188	0.135932	-0.2495
TGGT1_294670	translation initiation factor 3 subunit	1.17451	0.840966	0.232056	-0.249881
TGGT1_262040	SAC3/GANP family protein	1.06013	0.840031	0.0842362	-0.251486
TGGT1_300060	signal peptidase subunit protein	0.816427	0.83883	-0.292603	-0.25355
TGGT1_243710	t-complex protein beta subunit	1.62413	0.837244	0.699663	-0.25628
TGGT1_318410	putative TCP-1 chaperonin	0.960702	0.836967	-0.0578392	-0.256758
TGGT1_204480	thioredoxin domain-containing protein	0.728217	0.836636	-0.457559	-0.257328
TGGT1_262610	hypothetical protein	0.954853	0.834715	-0.06665	-0.260645
TGGT1_289330	ubiquitin carboxyl-terminal hydrolase family 2 protein	2.61403	0.833125	1.38628	-0.263395
TGGT1_229360	transaldolase	0.632441	0.832776	-0.660998	-0.263999
TGGT1_271280	putative 60S ribosome subunit biogenesis protein NIP7	1.01907	0.832608	0.0272492	-0.26429
TGGT1_269920	phosphatidylserine decarboxylase	1.00558	0.831897	0.00803056	-0.265523
TGGT1_258740	putative eukaryotic initiation factor-2A	1.03737	0.831362	0.052931	-0.266452
TGGT1_306030	glutathione s-transferase, n-terminal domain containing protein	0.693701	0.828687	-0.527614	-0.271101
TGGT1_217570	ribosomal protein RPS27	1.0037	0.828129	0.00532584	-0.272073
TGGT1_271050	SAG-related sequence SRS34A	0.601977	0.827326	-0.73222	-0.273473
TGGT1_319550	putative membrane protein C17G8.08c	0.84507	0.826027	-0.242858	-0.27574
TGGT1_284560	ribosomal protein RPL9	1.29468	0.824827	0.372594	-0.277836
TGGT1_258580	rhoptry protein ROP17	0.836401	0.823277	-0.257733	-0.280549
TGGT1_359490	elongation factor 1-alpha	0.963092	0.823225	-0.0542546	-0.280642
TGGT1_294800B	putative elongation factor 1-alpha (EF-1-ALPHA)	0.963092	0.823225	-0.0542546	-0.280642
TGGT1_286420B	putative elongation factor 1-alpha (EF-1-ALPHA)	0.963092	0.823225	-0.0542546	-0.280642
TGGT1_292220	PCI domain-containing protein	0.936367	0.82313	-0.0948544	-0.280808
TGGT1_300190	ribosomal protein RPL37A	0.999321	0.82101	-0.000980282	-0.284529
TGGT1_252360	rhoptry kinase family protein ROP24 (incomplete catalytic triad)	0.801859	0.8205	-0.318579	-0.285425
TGGT1_310860	U5 snRNP-specific protein	0.271592	0.820168	-1.88049	-0.286008
TGGT1_313080	hypothetical protein	0.704766	0.818349	-0.504784	-0.289213
TGGT1_319950	putative rRNA-processing protein FCF1	0.608099	0.817738	-0.717622	-0.29029
TGGT1_289770	mu1 adaptin	0.808007	0.817467	-0.307561	-0.290768
TGGT1_311720	chaperonin protein BiP	0.837178	0.817288	-0.256393	-0.291083
TGGT1_263060	Proteasome/cyclosome repeat-containing protein	0.982219	0.813568	-0.025883	-0.297664
TGGT1_306960	phenylalanine--tRNA ligase, beta subunit protein	1.06412	0.813332	0.0896596	-0.298083
TGGT1_271935	hypothetical protein	1.53865	0.809913	0.621667	-0.30416
TGGT1_261460	transcriptional elongation factor FACT80	0.893954	0.806975	-0.161727	-0.309404
TGGT1_363030	rhoptry protein ROP8	0.815578	0.806897	-0.294106	-0.309543
TGGT1_273360	ABC transporter transmembrane region domain-containing protein	0.700312	0.806572	-0.51393	-0.310125
TGGT1_263710	acyl-CoA:cholesterol acyltransferase alpha ACAT1-alpha	0.789987	0.804517	-0.340099	-0.313805
TGGT1_214440	4'-phosphopantetheinyl transferase superfamily protein	0.813243	0.802821	-0.298241	-0.31685
TGGT1_215260	carbamoylphosphate synthetase	1.07902	0.801687	0.109715	-0.318889
TGGT1_277760	putative adenylosuccinate lyase	1.06385	0.800589	0.0892886	-0.320867
TGGT1_235402	CorA family Mg2+ transporter protein	0.633611	0.800489	-0.658331	-0.321046
TGGT1_223920	rhoptry neck protein RON3	0.840934	0.798176	-0.249936	-0.325221
TGGT1_260010	acetyltransferase, GNAT family protein	0.755348	0.797157	-0.404786	-0.327065
TGGT1_253440	putative cell-cycle-associated protein kinase SRPK	2.99976	0.796731	1.58485	-0.327835
TGGT1_209720	hypothetical protein	0.984306	0.79568	-0.0228208	-0.32974
TGGT1_286580	hypothetical protein	1.8743	0.794875	0.906353	-0.331201
TGGT1_308840	SAG-related sequence SRS51	0.486767	0.791371	-1.0387	-0.337575
TGGT1_270270	hypothetical protein	1.57937	0.791009	0.65935	-0.338233
TGGT1_253090	DEAD/DEAH box helicase domain-containing protein	0.691629	0.788791	-0.53193	-0.342285
TGGT1_313560	putative 60S ribosomal protein L7a	0.885017	0.787777	-0.176222	-0.344141
TGGT1_236210	putative peptidase M16 family potein	0.951693	0.787504	-0.0714324	-0.34464
TGGT1_256090	glycerophosphodiester phosphodiesterase family protein	1.11543	0.787176	0.157595	-0.345242
TGGT1_360830	nucleoside-triphosphatase	0.78546	0.786571	-0.34839	-0.346351
TGGT1_291300	putative RER1 protein	0.58776	0.785485	-0.7667	-0.348345
TGGT1_237150	putative minor histocompatibility antigen h13	1.01708	0.783761	0.0244384	-0.351515
TGGT1_261010	putative tat-binding family protein	0.803027	0.781799	-0.316479	-0.35513
TGGT1_219250	acetyltransferase, GNAT family protein	0.80761	0.781176	-0.308269	-0.356281
TGGT1_231970	pre-mRNA processing splicing factor PRP8	1.26689	0.780939	0.341294	-0.356717
TGGT1_211250	hypothetical protein	0.778477	0.780892	-0.361273	-0.356805
TGGT1_203630	ribosomal protein RPL44	1.4336	0.780301	0.519642	-0.357896
TGGT1_232350	lactate dehydrogenase LDH1	0.658043	0.779141	-0.603745	-0.360043
TGGT1_262380	putative elongation factor Tu	0.814393	0.778561	-0.296203	-0.361117
TGGT1_234420	ATPase, AAA family protein	0.952858	0.776529	-0.0696664	-0.364889
TGGT1_309600	hypothetical protein	1.17828	0.776521	0.236687	-0.364903
TGGT1_305850	RNA recognition motif-containing protein	0.905102	0.775649	-0.143848	-0.366525
TGGT1_259830	diacylglycerol kinase catalytic domain-containing protein	1.63197	0.773896	0.706617	-0.369789
TGGT1_244390	coatomer epsilon subunit protein	0.723337	0.769651	-0.46726	-0.377723
TGGT1_239050	hypothetical protein	0.805009	0.769402	-0.312923	-0.37819
TGGT1_315210	putative rhoptry protein	0.730248	0.768922	-0.453542	-0.379091
TGGT1_237250	hypothetical protein	0.449537	0.768252	-1.15349	-0.380348
TGGT1_215590	flavoprotein subunit of succinate dehydrogenase	0.697024	0.765322	-0.520721	-0.385862
TGGT1_253750	PLU-1 family protein	0.762835	0.764082	-0.390556	-0.388201
TGGT1_205510	putative nucleolar protein 5	0.765065	0.763273	-0.386346	-0.38973
TGGT1_286590	microtubule associated protein SPM2	0.664458	0.762661	-0.589751	-0.390887
TGGT1_271390	hypothetical protein	0.565257	0.759125	-0.823022	-0.397591
TGGT1_285980B	glucosephosphate-mutase GPM1	0.881361	0.754989	-0.182195	-0.405472
TGGT1_233830	hypothetical protein	0.756204	0.753228	-0.403152	-0.408842
TGGT1_269800	putative glutamine-dependent NAD(+) synthetase protein	1.19424	0.750651	0.256092	-0.413787
TGGT1_240850	WD domain, G-beta repeat-containing protein	1.16577	0.749203	0.221279	-0.41657
TGGT1_248850	methionine aminopeptidase	1.38658	0.747906	0.471532	-0.419072
TGGT1_273920	putative aldose reductase	0.702175	0.747608	-0.510097	-0.419646
TGGT1_278530	putative multiprotein bridging factor type 1 family transcriptional co-activator	0.890032	0.747598	-0.16807	-0.419666
TGGT1_218410	ribosomal protein RPP0	0.891461	0.747509	-0.165757	-0.419838
TGGT1_239490	dehydrogenase E1 component family protein	0.798013	0.745878	-0.325516	-0.422989
TGGT1_255690	2-C-methyl-D-erythritol 2,4-cyclodiphosphate synthase domain-containing protein	0.723112	0.744668	-0.467709	-0.425331
TGGT1_283780	glucose-6-phosphate isomerase GPI	0.885351	0.744587	-0.175679	-0.425487
TGGT1_273870	SWI2/SNF2 ISWI-like (AT hook)	0.837463	0.744388	-0.255903	-0.425874
TGGT1_213280	SAG-related sequence SRS25	0.536183	0.742372	-0.899201	-0.429785
TGGT1_244370	putative TDC1	0.947329	0.741056	-0.0780631	-0.432345
TGGT1_289970	hypothetical protein	1.01603	0.737535	0.0229375	-0.439217
TGGT1_263730	FAD-dependent glycerol-3-phosphate dehydrogenase	0.784182	0.73618	-0.35074	-0.441869
TGGT1_263500	putative vacuolar protein sorting-associated protein 26	0.969701	0.734076	-0.0443879	-0.445999
TGGT1_244650	putative eukaryotic initiation factor-5	0.680398	0.733702	-0.555549	-0.446734
TGGT1_305860	calcium-dependent protein kinase CDPK3	0.69883	0.731358	-0.516986	-0.45135
TGGT1_225380	hypothetical protein	1.10839	0.731198	0.148462	-0.451667
TGGT1_278830	glucose-6-phosphate 1-dehydrogenase	0.763229	0.730792	-0.389812	-0.452467
TGGT1_311290	protein tyrosine phosphatase family protein, ptpla protein	0.628663	0.728255	-0.66964	-0.457484
TGGT1_226280	putative ribosomal protein L28	0.940656	0.725311	-0.0882605	-0.463328
TGGT1_214770	putative small GTP binding protein rab1a	1.06276	0.72152	0.087822	-0.470889
TGGT1_258560	hypothetical protein	1.0866	0.719815	0.119817	-0.474302
TGGT1_318440	helicase associated domain (ha2) protein	1.0421	0.71971	0.059499	-0.474513
TGGT1_225150	hypothetical protein	0.749001	0.719569	-0.41696	-0.474794
TGGT1_314740	PSP protein	0.841287	0.71925	-0.24933	-0.475435
TGGT1_220100	phosphoribosylpyrophosphate synthetase	0.582927	0.718896	-0.778612	-0.476144
TGGT1_313190	Rab18/RabC-family small GTPase	1.14959	0.718548	0.201119	-0.476843
TGGT1_222860	putative eukaryotic translation initiation factor	1.114	0.717659	0.155753	-0.478629
TGGT1_266640	putative Acetyl-coenzyme A synthetase 2	1.59942	0.716979	0.677549	-0.479998
TGGT1_229990	putative T-complex protein 1 subunit alpha	0.859733	0.716482	-0.218039	-0.480998
TGGT1_279390	putative proliferation-associated protein 2G4	0.848903	0.714816	-0.236328	-0.484357
TGGT1_253350	hypothetical protein	0.77407	0.714682	-0.369464	-0.484626
TGGT1_312990	DEAD/DEAH box ATP-dependent RNA helicase	0.935538	0.714224	-0.0961318	-0.485551
TGGT1_261760	CDP-alcohol phosphatidyltransferase superfamily protein	0.949821	0.713937	-0.0742718	-0.486131
TGGT1_261950	ATP synthase beta subunit ATP-B	0.917478	0.713299	-0.124255	-0.487422
TGGT1_262050	rhoptry kinase family protein ROP39	0.560068	0.713157	-0.836326	-0.487709
TGGT1_285850	peptidyl-prolyl cis-trans isomerase, FKBP-type domain-containing protein	0.881523	0.712722	-0.18193	-0.488588
TGGT1_251600	putative IMP4 family U3 small nucleolar ribonucleoprotein (snoRNP)	1.51181	0.710249	0.596276	-0.493603
TGGT1_202370	putative T-complex protein 1, epsilon subunit (TCP-1-epsilon)	0.924447	0.708697	-0.113338	-0.49676
TGGT1_218840	mutS domain protein	0.218773	0.703265	-2.19249	-0.50786
TGGT1_207620	pyridine nucleotide-disulfide oxidoreductase domain-containing protein	0.750048	0.701865	-0.414945	-0.510735
TGGT1_256000	endoplasmic reticulum retention receptor	1.00236	0.700273	0.00339501	-0.514012
TGGT1_275860	hypothetical protein	0.869977	0.698194	-0.200951	-0.5183
TGGT1_259990	SAC3/GANP family protein	0.666893	0.697893	-0.584474	-0.518922
TGGT1_263810	hypothetical protein	0.738511	0.697564	-0.437309	-0.519602
TGGT1_271440	NPL4 family protein	0.801274	0.693756	-0.319632	-0.5275
TGGT1_278660	putative P-type ATPase4	0.844	0.690938	-0.244686	-0.533372
TGGT1_286470	AGC kinase	0.758155	0.688825	-0.399435	-0.537791
TGGT1_228420	protein kinase, cAMP-dependent, catalytic chain	0.758155	0.688825	-0.399435	-0.537791
TGGT1_263850	hypothetical protein	0.792091	0.688452	-0.336261	-0.538572
TGGT1_318580	glucosephosphate-mutase GPM2	0.792123	0.688314	-0.336203	-0.538861
TGGT1_249630	glutathione S-transferase, N-terminal domain-containing protein	1.17284	0.688172	0.230003	-0.539159
TGGT1_269950	hypothetical protein	0.963039	0.687346	-0.0543343	-0.540891
TGGT1_311400	WD domain, G-beta repeat-containing protein	1.3696	0.68669	0.453755	-0.542269
TGGT1_218820	alba 2	0.448707	0.685121	-1.15615	-0.545569
TGGT1_226030	AGC kinase	0.800307	0.684725	-0.321375	-0.546404
TGGT1_411430	rhoptry protein ROP5	0.907408	0.683735	-0.140176	-0.548491
TGGT1_216720	hypothetical protein	0.962221	0.683548	-0.0555596	-0.548885
TGGT1_228290	phospholipase/carboxylesterase	0.805877	0.68333	-0.311369	-0.549345
TGGT1_203990	rhoptry protein ROP12	0.874352	0.681558	-0.193714	-0.553091
TGGT1_288360	tryptophanyl-tRNA synthetase (TrpRS2)	0.631339	0.681226	-0.663514	-0.553794
TGGT1_223940	GAP45 protein	0.623246	0.676617	-0.682126	-0.563589	GAP45
TGGT1_213900	regulator of chromosome condensation RCC1	1.98266	0.672116	0.987434	-0.573217
TGGT1_273520	PCI domain-containing protein	0.646068	0.671417	-0.630241	-0.574719
TGGT1_321520	hypothetical protein	1.45743	0.670922	0.543428	-0.575783
TGGT1_270830	small nuclear ribonucleoprotein	0.919502	0.670082	-0.121075	-0.577591
TGGT1_209910	histone H2Bv	0.644315	0.669445	-0.634161	-0.578962
TGGT1_212290	ribosomal protein RPS19	1.15921	0.669111	0.213146	-0.579683
TGGT1_218540	putative peptidase S15	1.01223	0.667578	0.0175312	-0.582992
TGGT1_224580	RNA recognition motif-containing protein	0.541351	0.667394	-0.885364	-0.583389
TGGT1_251620	putative flap structure-specific endonuclease 1	0.860745	0.666276	-0.216343	-0.585808
TGGT1_310050	RNA recognition motif-containing protein	2.60036	0.665937	1.37871	-0.586543
TGGT1_408820	NTPase	0.784398	0.665484	-0.350341	-0.587524
TGGT1_260440	nuclear factor NF3	0.895282	0.664828	-0.159586	-0.588946
TGGT1_308020	SAG-related sequence SRS57	0.725332	0.664253	-0.463286	-0.590194
TGGT1_288270	hypothetical protein	0.546977	0.662966	-0.870449	-0.592994
TGGT1_265330	putative cell-cycle-associated protein kinase GSK	0.963299	0.662336	-0.0539447	-0.594366
TGGT1_269840	proteasome regulatory subunit	0.781422	0.661759	-0.355826	-0.595621
TGGT1_294200	glucose-6-phosphate 1-dehydrogenase	0.755514	0.659884	-0.40447	-0.599715
TGGT1_215775	rhoptry protein ROP8	0.708809	0.659141	-0.49653	-0.60134
TGGT1_310070	putative methyltransferase	1.38041	0.658994	0.465097	-0.601663
TGGT1_319340	hypothetical protein	0.81367	0.656168	-0.297484	-0.607863
TGGT1_226430	reticulon protein	0.78453	0.655569	-0.3501	-0.609181
TGGT1_301440	calcium-dependent protein kinase CDPK1	0.727099	0.654909	-0.459777	-0.610633
TGGT1_264440	signal recognition particle receptor beta subunit protein	0.87268	0.652732	-0.196475	-0.615438
TGGT1_231850	serine-threonine phosophatase 2C (PP2C)	2.69959	0.652054	1.43274	-0.616936
TGGT1_242680	ribosomal protein RPL24e	1.58361	0.651442	0.663216	-0.618292
TGGT1_267600	FHA domain-containing protein	0.819928	0.649986	-0.286431	-0.621519
TGGT1_216180	hypothetical protein	0.867456	0.649558	-0.205138	-0.62247
TGGT1_249870	hypothetical protein	1.106	0.645285	0.145349	-0.631991
TGGT1_232130	hypothetical protein	0.84316	0.642613	-0.246121	-0.637979
TGGT1_286600	hypothetical protein	0.691729	0.641085	-0.531721	-0.641413
TGGT1_200470	hypothetical protein	0.851208	0.639109	-0.232416	-0.645866
TGGT1_267480	putative tRNA (guanine(26)-N(2))-dimethyltransferase	0.744448	0.63719	-0.425758	-0.650203
TGGT1_249270	putative protein disulfide isomerase-related protein (provisional)	0.534097	0.635964	-0.904827	-0.652983
TGGT1_280560	selenide, water dikinase	0.387035	0.633087	-1.36946	-0.659525
TGGT1_210840	arginyl-tRNA synthetase family protein	0.677619	0.632396	-0.561454	-0.6611
TGGT1_202770	RNA recognition motif-containing protein	1.16972	0.630599	0.226163	-0.665206
TGGT1_212300	hypothetical protein	0.937189	0.630514	-0.0935886	-0.6654
TGGT1_229620	hypothetical protein	0.832265	0.630148	-0.264885	-0.666238
TGGT1_272290	pyruvate dehydrogenase complex subunit PD-HE1Beta	0.59722	0.629313	-0.743666	-0.668151
TGGT1_219832	cyclin-dependent kinase regulatory subunit protein	0.829163	0.628155	-0.270272	-0.670808
TGGT1_247410	hypothetical protein	0.777054	0.627597	-0.363914	-0.67209
TGGT1_293580	prefoldin subunit protein	0.944384	0.627361	-0.0825541	-0.672632
TGGT1_251480	DEAD/DEAH box helicase domain-containing protein	1.03435	0.627104	0.0487233	-0.673223
TGGT1_310750	emp24/gp25L/p24 family protein	0.798478	0.626394	-0.324675	-0.674858
TGGT1_410360	putative transmembrane protein	0.824046	0.625283	-0.279204	-0.677418
TGGT1_320010	hypothetical protein	0.730223	0.624857	-0.453591	-0.678403
TGGT1_223140	tRNA binding domain-containing protein	0.931165	0.624763	-0.102891	-0.67862
TGGT1_238010	ribosomal protein RPL23A	1.92369	0.624084	0.943876	-0.680187
TGGT1_207720	hypothetical protein	0.782851	0.623977	-0.353191	-0.680435
TGGT1_280600	putative histidyl-tRNA synthetase (HisRS)	0.824987	0.620074	-0.277557	-0.689488
TGGT1_248810	nuclear factor NF7	0.834622	0.619015	-0.260806	-0.691954
TGGT1_228190	putative eukaryotic initiation factor-3, subunit 5	0.854039	0.618204	-0.227626	-0.693845
TGGT1_288500	FAD Malate-dehydrogenase (MDH-FAD)	0.667459	0.618201	-0.583249	-0.693852
TGGT1_315220	rhoptry protein ROP14	0.848955	0.616773	-0.23624	-0.697189
TGGT1_217510	hypothetical protein	1.24833	0.616648	0.320002	-0.697481
TGGT1_309590	rhoptry protein ROP1	0.809827	0.613953	-0.304315	-0.703801
TGGT1_203310	dense granule protein GRA7	0.459802	0.613724	-1.12092	-0.704339
TGGT1_314400	putative pyruvate dehydrogenase E1 component, beta subunit	0.799385	0.610159	-0.323037	-0.712744
TGGT1_209140	anti-silencing protein, ASF1 family protein	1.45002	0.607798	0.536069	-0.718337
TGGT1_236190	hypothetical protein	0.752621	0.607406	-0.410004	-0.719268
TGGT1_321500	RNA recognition motif-containing protein	0.934859	0.606976	-0.097179	-0.720289
TGGT1_320600	cold-shock DNA-binding domain-containing protein	0.915781	0.60667	-0.126925	-0.721016
TGGT1_230450	bifunctional GMP synthase/glutamine amidotransferase protein	0.828421	0.606579	-0.271565	-0.721232
TGGT1_269190	glyceraldehyde-3-phosphate dehydrogenase GAPDH2	0.680893	0.606318	-0.554499	-0.721854
TGGT1_242070	cAMP-dependent protein kinase regulatory subunit	0.741083	0.60482	-0.432292	-0.725421
TGGT1_209950	putative thioredoxin	0.401072	0.60373	-1.31807	-0.728025
TGGT1_295110	rhoptry protein ROP7	0.864968	0.603238	-0.209282	-0.7292
TGGT1_216220	AP2 domain transcription factor AP2XI-5	0.847755	0.599468	-0.238281	-0.738245
TGGT1_273840	brix domain-containing protein	0.966455	0.599001	-0.049226	-0.739371
TGGT1_202200	hypothetical protein	0.720394	0.598048	-0.473141	-0.741666
TGGT1_236950	hypothetical protein	1.39363	0.597979	0.478843	-0.741834
TGGT1_277270	NTPase II	0.944241	0.597951	-0.082773	-0.741902
TGGT1_227810	rhoptry kinase family protein ROP11 (incomplete catalytic triad)	0.364604	0.597438	-1.4556	-0.743138
TGGT1_226410	EF-1 guanine nucleotide exchange domain-containing protein	0.85535	0.594318	-0.225413	-0.750694
TGGT1_205240	cleft lip and palate transmembrane protein 1 (clptm1) protein	0.736695	0.591526	-0.440861	-0.757487
TGGT1_233890	hypothetical protein	1.18758	0.591012	0.248025	-0.758741
TGGT1_277910	thrombospondin type 1 domain-containing protein	0.786041	0.590988	-0.347324	-0.758799
TGGT1_235970	putative eukaryotic initiation factor-2 gamma	0.898232	0.590315	-0.15484	-0.760444
TGGT1_361650	proteasome/cyclosome repeat protein	0.542033	0.589297	-0.883547	-0.762932
TGGT1_294290	Der1ER1	0.785656	0.587112	-0.348031	-0.768293
TGGT1_320570	putative elongation factor Tu	1.50901	0.58679	0.593599	-0.769084
TGGT1_306060	rhoptry neck protein RON8	0.889766	0.586437	-0.168502	-0.769953
TGGT1_297500	T-complex protein 1 eta subunit	1.12245	0.584765	0.166648	-0.774071
TGGT1_294800A	putative elongation factor 1-alpha (EF-1-ALPHA)	0.746804	0.583026	-0.421199	-0.778367
TGGT1_286420A	putative elongation factor 1-alpha (EF-1-ALPHA)	0.746804	0.583026	-0.421199	-0.778367
TGGT1_287180	hypothetical protein	1.01287	0.57943	0.0184531	-0.787294
TGGT1_410770	histone deacetylase SIR2-like protein	1.53302	0.579331	0.616379	-0.787539
TGGT1_270070	synaptobrevin family protein	0.203902	0.578149	-2.29406	-0.790487
TGGT1_251780	heat shock protein	0.895921	0.577945	-0.158557	-0.790995
TGGT1_299110	cleft lip and palate transmembrane protein 1 (clptm1) protein	0.866171	0.577811	-0.207276	-0.79133
TGGT1_300310	26S proteasome regulatory subunit, S6a family AAA ATpase	1.03033	0.575855	0.0431062	-0.796221
TGGT1_260500	putative COPI associated protein	1.05431	0.569723	0.0762978	-0.811668
TGGT1_235990	hypothetical protein	0.96398	0.568836	-0.0529255	-0.813915
TGGT1_285980A	glucosephosphate-mutase GPM1	0.797309	0.564072	-0.326789	-0.826048
TGGT1_219820	putative polyubiquitin UbC	0.8496	0.563454	-0.235144	-0.827631
TGGT1_289750	ribosomal-ubiquitin protein RPL40	0.8496	0.563454	-0.235144	-0.827631
TGGT1_311430	fibrillarin	0.882762	0.560391	-0.179903	-0.835494
TGGT1_230060	acetyltransferase, GNAT family protein	0.964088	0.560347	-0.0527626	-0.835607
TGGT1_263300	eukaryotic porin protein	0.746873	0.560032	-0.421066	-0.836419
TGGT1_290890	putative carbonyl reductase 1	0.747319	0.559189	-0.420205	-0.838593
TGGT1_247440	hypothetical protein	1.01321	0.558832	0.0189312	-0.839514
TGGT1_219140	EF-1 guanine nucleotide exchange domain-containing protein	1.28965	0.558638	0.366975	-0.840015
TGGT1_242400	calcium-dependent protein kinase CDPK2B	0.98021	0.55598	-0.0288378	-0.846894
TGGT1_230410	peroxiredoxin PRX3	0.966551	0.552416	-0.0490823	-0.856172
TGGT1_300200	histone H2AZ	0.540962	0.551762	-0.8864	-0.857882
TGGT1_216450	peptidase, T1 family protein	0.334362	0.551463	-1.58052	-0.858663
TGGT1_306195	hypothetical protein	0.690998	0.550344	-0.533247	-0.861594
TGGT1_263430	3-hydroxyisobutyrate dehydrogenase	1.04725	0.549986	0.0666126	-0.862532
TGGT1_300100	rhoptry neck protein RON2	0.77693	0.54959	-0.364143	-0.863573
TGGT1_205470	putative translation elongation factor 2 family protein	0.985957	0.549497	-0.0204027	-0.863816
TGGT1_217650	hypothetical protein	1.0105	0.549359	0.0150717	-0.864178
TGGT1_309760	hypothetical protein	2.23638	0.548677	1.16116	-0.865972
TGGT1_313000	Toxoplasma gondii family D protein	0.754617	0.547497	-0.406184	-0.869078
TGGT1_208830	hypothetical protein	0.974736	0.54681	-0.0369161	-0.870889
TGGT1_268590	rhomboid protease ROM4	0.394968	0.546711	-1.34019	-0.87115
TGGT1_232660	Hsp70 interacting protein HIP	1.76924	0.546159	0.82313	-0.872607
TGGT1_241170	hypothetical protein	0.403883	0.545516	-1.30799	-0.874306
TGGT1_218300	zinc finger (CCCH type) motif-containing protein	1.66117	0.54447	0.732202	-0.877075
TGGT1_229470	hypothetical protein	1.21159	0.542966	0.276901	-0.881065
TGGT1_217740	3-ketoacyl-(acyl-carrier-protein) reductase	0.733391	0.541334	-0.447345	-0.885408
TGGT1_238150	hypothetical protein	0.833613	0.538647	-0.262551	-0.892589
TGGT1_264450	putative DNA topoisomerase III beta-1	0.840279	0.538329	-0.25106	-0.89344
TGGT1_272400	casein kinase ii regulatory subunit protein	1.32033	0.53792	0.400902	-0.894537
TGGT1_269885A	rhoptry metalloprotease toxolysin TLN1	0.876049	0.537751	-0.190916	-0.894989
TGGT1_225050	putative adenosylhomocysteinase	0.998845	0.536529	-0.00166679	-0.898272
TGGT1_275440	dense granule protein GRA6	0.519188	0.535669	-0.945672	-0.900587
TGGT1_226830	DnaK family protein	0.721949	0.534795	-0.47003	-0.902943
TGGT1_320450	ribosome biogenesis regulatory protein (rrs1) protein	1.33979	0.533842	0.422008	-0.905514
TGGT1_310040	putative ubiquitin conjugating enzyme E2	0.768781	0.532743	-0.379355	-0.908488
TGGT1_288750	ubiquinol-cytochrome c reductase	0.265726	0.531095	-1.91199	-0.912959
TGGT1_206670	hypothetical protein	0.660659	0.529002	-0.598023	-0.918654
TGGT1_312270	rhoptry protein ROP13	0.763546	0.528909	-0.389214	-0.918908
TGGT1_248460	putative ubiquitin	1.02384	0.528895	0.0339936	-0.918947
TGGT1_237510	hypothetical protein	1.15433	0.528026	0.207057	-0.921318
TGGT1_284190	pyruvate carboxylase	0.739022	0.527288	-0.436311	-0.923336
TGGT1_268850	enolase 2	0.973616	0.524029	-0.0385754	-0.932281
TGGT1_299780	hypothetical protein	0.836876	0.521835	-0.256915	-0.938334
TGGT1_278990	putative phosphate carrier	0.841085	0.52182	-0.249676	-0.938377
TGGT1_305290	putative vacuolar atp synthase subunit e	0.802069	0.51917	-0.318202	-0.94572
TGGT1_249610	hypothetical protein	0.756412	0.518711	-0.402756	-0.946996
TGGT1_263520	microtubule associated protein SPM1	0.784496	0.515658	-0.350162	-0.955514
TGGT1_279380	hypothetical protein	1.17796	0.513206	0.236288	-0.962391
TGGT1_311470	rhoptry neck protein RON5	0.834335	0.511769	-0.261301	-0.966434
TGGT1_311840	hypothetical protein	0.755864	0.50997	-0.403802	-0.971516
TGGT1_306670	hypothetical protein	1.18242	0.50823	0.241743	-0.976448
TGGT1_204050	subtilisin SUB1	0.534405	0.505799	-0.903995	-0.983363
TGGT1_236580	Prp31-15.5k-U4 Snrna Complex family protein	0.529849	0.504704	-0.916347	-0.986491
TGGT1_214575	hypothetical protein	0.648976	0.501216	-0.623763	-0.996496
TGGT1_219540	cytosolic tRNA-Ala synthetase	0.7784	0.497805	-0.361416	-1.00635
TGGT1_268860	enolase 1	0.945577	0.496573	-0.0807333	-1.00992
TGGT1_213730	lanthionine synthetase C family protein	0.907827	0.496369	-0.139511	-1.01052
TGGT1_295125	rhoptry protein ROP4	0.873492	0.496266	-0.195133	-1.01082
TGGT1_275690	putative ClpB	0.904208	0.492465	-0.145273	-1.02191
TGGT1_249180	bifunctional dihydrofolate reductase-thymidylate synthase	0.860114	0.490583	-0.217401	-1.02743
TGGT1_220400	actin depolymerizing factor ADF	0.685625	0.488226	-0.544508	-1.03438
TGGT1_308970	hypothetical protein	1.29188	0.484796	0.369471	-1.04455
TGGT1_317720	putative eukaryotic translation initiation factor 3 subunit 7	0.806242	0.482951	-0.310715	-1.05005
TGGT1_205710	lysine-tRNA ligase	1.09536	0.48281	0.131404	-1.05047
TGGT1_267330	fumarate hydratase	0.765464	0.478189	-0.385594	-1.06435
TGGT1_257740	UMP-CMP kinase	0.801104	0.472504	-0.319938	-1.0816
TGGT1_251690	putative seryl-tRNA synthetase, cytoplasmic	0.840167	0.471974	-0.251252	-1.08322
TGGT1_260820	IMC sub-compartment protein ISP1	1.39965	0.471938	0.485061	-1.08333	ISP1
TGGT1_290660	RNA recognition motif-containing protein	0.925708	0.471687	-0.111371	-1.0841
TGGT1_272010	Gar1 protein RNA binding region protein	0.918032	0.470038	-0.123383	-1.08915
TGGT1_247520	hypothetical protein	0.74779	0.467958	-0.419295	-1.09555
TGGT1_224060	putative thioredoxin	1.08949	0.467191	0.123652	-1.09792
TGGT1_224240	protein phosphatase 2C domain-containing protein	0.495526	0.465481	-1.01297	-1.10321
TGGT1_316255	hypothetical protein	0.486892	0.464323	-1.03833	-1.1068
TGGT1_205360	hypothetical protein	1.23662	0.464149	0.306404	-1.10734
TGGT1_313140	isocitrate dehydrogenase	0.783855	0.460677	-0.351341	-1.11817
TGGT1_294040	putative KDEL endoplasmic reticulum proteinretention receptor 2 (KDELR2)	0.875078	0.456953	-0.192517	-1.12988
TGGT1_305160	histone H2Ba	0.799321	0.456589	-0.323152	-1.13103
TGGT1_251870	histone H2Bb	0.799321	0.456589	-0.323152	-1.13103
TGGT1_220240	hypothetical protein	0.717418	0.45565	-0.479115	-1.134
TGGT1_221950	putative splicesome-associated protein	0.912378	0.455137	-0.132297	-1.13563
TGGT1_292190	hypothetical protein	1.06624	0.454468	0.092536	-1.13775
TGGT1_209280	hypothetical protein	0.679857	0.452074	-0.556697	-1.14537
TGGT1_226960	phosphofructokinase PFKII	0.894695	0.451422	-0.160532	-1.14745
TGGT1_215980	hypothetical protein	0.916134	0.45054	-0.126369	-1.15027
TGGT1_269650	FFD and TFG box motifs protein	1.48635	0.448857	0.571778	-1.15567
TGGT1_255260	apical membrane antigen AMA1	0.72331	0.448792	-0.467314	-1.15588
TGGT1_216040	putative 30S ribosomal protein S15	1.54142	0.448185	0.624258	-1.15784
TGGT1_291960	rhoptry kinase family protein ROP40 (incomplete catalytic triad)	0.636173	0.4474	-0.652508	-1.16036
TGGT1_310370	hypothetical protein	0.625404	0.447383	-0.677139	-1.16042
TGGT1_310780	dense granule protein GRA4	0.493657	0.446606	-1.01842	-1.16293
TGGT1_293280	cyclin protein	0.314223	0.445334	-1.67014	-1.16704
TGGT1_272660	hypothetical protein	0.77767	0.445277	-0.36277	-1.16723
TGGT1_286210	protein phosphatase 4, catalytic subunit	0.782837	0.437965	-0.353217	-1.19111
TGGT1_258870A	hypothetical protein	0.784378	0.437925	-0.350378	-1.19125
TGGT1_290670	leucyl aminopeptidase LAP	0.897867	0.437466	-0.155426	-1.19276
TGGT1_241240	hypothetical protein	0.647181	0.436147	-0.627758	-1.19711
TGGT1_229180	HEAT repeat-containing protein	0.853796	0.436083	-0.228037	-1.19733
TGGT1_227360	ribosomal protein RPL3	1.02917	0.435704	0.0414828	-1.19858
TGGT1_223485	hypothetical protein	0.566375	0.435318	-0.820169	-1.19986
TGGT1_304740	rhoptry kinase family protein ROP35	1.07907	0.43384	0.109791	-1.20476
TGGT1_248740	hypothetical protein	0.72883	0.433559	-0.456347	-1.2057
TGGT1_263090	14-3-3 protein	0.833626	0.430425	-0.262528	-1.21617	14-3-3
TGGT1_228490	hypothetical protein	0.865098	0.43031	-0.209064	-1.21655
TGGT1_310080	AMP-binding enzyme domain-containing protein	0.754529	0.429498	-0.406352	-1.21928
TGGT1_240060	hypothetical protein	1.04018	0.427567	0.0568368	-1.22578
TGGT1_238050	nuclease and tudor domain-containing protein	2.20356	0.426261	1.13984	-1.23019
TGGT1_232050	DnaJ domain-containing protein	0.701637	0.423803	-0.511202	-1.23853
TGGT1_220300	ribosomal protein L15 protein	0.875849	0.422831	-0.191245	-1.24185
TGGT1_221320	acetyl-CoA carboxylase ACC1	0.646537	0.420078	-0.629196	-1.25127
TGGT1_261240	histone H3	0.797974	0.4178	-0.325587	-1.25912
TGGT1_218260	histone H3.3	0.797974	0.4178	-0.325587	-1.25912
TGGT1_239330	ribosomal protein RPL37	2.24138	0.416934	1.16439	-1.26211
TGGT1_226980	hypothetical protein	0.794971	0.416414	-0.331027	-1.26391
TGGT1_266080	hypothetical protein	0.564709	0.412537	-0.824419	-1.27741
TGGT1_202350	putative 50S ribosomal protein L21	1.03773	0.410301	0.0534245	-1.28525
TGGT1_290940	EMP/nonaspanin domain family protein	0.802028	0.41011	-0.318275	-1.28592
TGGT1_239752	hypothetical protein	0.922348	0.40946	-0.116617	-1.2882
TGGT1_304760	RNA recognition motif-containing protein	0.822025	0.406299	-0.282746	-1.29939
TGGT1_275650	hypothetical protein	0.881073	0.403967	-0.182667	-1.30769
TGGT1_225930	triose-phosphate isomerase TPI-I	0.353499	0.402752	-1.50022	-1.31204
TGGT1_216670	FUSE-binding protein 2 / KH-type splicing regulatory protein	1.09352	0.402558	0.128984	-1.31273
TGGT1_316540	IMC sub-compartment protein ISP3	0.954894	0.3997	-0.0665874	-1.32301	ISP3
TGGT1_263040	ribosomal protein RPS16	1.14882	0.399376	0.200158	-1.32418
TGGT1_243730	rhoptry protein ROP9	0.526979	0.396795	-0.924183	-1.33354
TGGT1_294560	rhoptry kinase family protein ROP37 (incomplete catalytic triad)	0.713395	0.394692	-0.487228	-1.3412
TGGT1_216560	methyltransferase domain-containing protein	1.43173	0.393945	0.517756	-1.34393
TGGT1_258870B	hypothetical protein	1.04323	0.393154	0.0610635	-1.34683
TGGT1_306600	RNA recognition motif-containing protein	0.980964	0.391538	-0.027728	-1.35278
TGGT1_230430	putative vesicle-associated membrane protein	0.910458	0.391436	-0.135336	-1.35315
TGGT1_254440	ribosomal protein RPL12	0.961929	0.390472	-0.0559979	-1.35671
TGGT1_249990	hypothetical protein	0.844831	0.389254	-0.243265	-1.36122
TGGT1_219550	dihydrolipoyllysine-residue succinyltransferase component of oxoglutarate dehydrogenase	0.23214	0.384495	-2.10693	-1.37896
TGGT1_273960	chaperonin GroS protein	0.534847	0.383158	-0.902802	-1.38399
TGGT1_227620	dense granule protein GRA2	0.340408	0.383101	-1.55466	-1.3842
TGGT1_260380	hypothetical protein	0.614291	0.382492	-0.703006	-1.3865
TGGT1_319850	splicing factor U2AF family SnRNP auxilary factor large subunit, RRM domain-containing protein	0.960993	0.382361	-0.0574025	-1.38699
TGGT1_259040	hypothetical protein	0.392748	0.382115	-1.34833	-1.38792
TGGT1_219770	putative 30S ribosomal protein S12	1.18551	0.37966	0.245503	-1.39722
TGGT1_293690	profilin PRF	0.85367	0.377327	-0.22825	-1.40611
TGGT1_209755B	hypothetical protein	0.505418	0.371879	-0.984452	-1.42709
TGGT1_237820	IMC sub-compartment protein ISP2	0.571543	0.370637	-0.807067	-1.43192	ISP2
TGGT1_216435	hypothetical protein	0.798735	0.368275	-0.324211	-1.44115
TGGT1_310210	hypothetical protein	0.252441	0.364654	-1.98598	-1.4554
TGGT1_259550	dihydropteroate synthase	0.995054	0.362826	-0.00715255	-1.46265
TGGT1_261580	histone H2AX	0.708698	0.362425	-0.496757	-1.46425
TGGT1_223930	RNA recognition motif-containing protein	0.741364	0.360601	-0.431746	-1.47153
TGGT1_283878	RNA recognition motif-containing protein	0.968214	0.360242	-0.0466019	-1.47296
TGGT1_257040	TB2/DP1, HVA22 family protein	0.692326	0.360214	-0.530477	-1.47308
TGGT1_232410	PDI family protein	0.609962	0.360001	-0.713208	-1.47393
TGGT1_254580	UDP-galactose transporter family protein	0.235966	0.359563	-2.08335	-1.47568
TGGT1_294350	DEAD/DEAH box helicase domain-containing protein	1.11786	0.358971	0.160741	-1.47806
TGGT1_214080	toxofilin	0.396983	0.358919	-1.33285	-1.47827
TGGT1_215220	hypothetical protein	0.98417	0.35788	-0.0230203	-1.48245
TGGT1_313830	AARP2CN (NUC121) domain-containing protein	0.749296	0.35487	-0.416393	-1.49464
TGGT1_240570	hypothetical protein	0.994236	0.353312	-0.00833926	-1.50099
TGGT1_264600	hypothetical protein	0.789563	0.352628	-0.340874	-1.50378
TGGT1_315770	cytochrome p450 superfamily protein	0.978278	0.349476	-0.0316837	-1.51674
TGGT1_261510	hypothetical protein	0.607217	0.346801	-0.719716	-1.52782
TGGT1_318310	transketolase	0.412506	0.346244	-1.27751	-1.53014
TGGT1_226380	hypothetical protein	1.16981	0.344884	0.226273	-1.53582
TGGT1_297470	putative myosin light chain 2	0.546122	0.340811	-0.872706	-1.55296
TGGT1_263530	putative chaperonin	0.810594	0.339374	-0.302949	-1.55905
TGGT1_202630	ATP-dependent metallopeptidase HflB subfamily protein	0.712307	0.338655	-0.48943	-1.56211
TGGT1_254690	phospholipase/carboxylesterase	2.05243	0.336231	1.03733	-1.57247
TGGT1_270640	RNA recognition motif-containing protein	1.17794	0.334936	0.236266	-1.57804
TGGT1_214290	DJ-1 family protein	0.694377	0.333968	-0.526209	-1.58222
TGGT1_289300	methionyl-tRNA synthetase	0.928745	0.331939	-0.106646	-1.59101
TGGT1_310700	serine/threonine phosophatase PP1	0.873013	0.331594	-0.195926	-1.59251
TGGT1_261440	ARM repeats containing protein	0.650497	0.327477	-0.620385	-1.61054
TGGT1_201780	microneme protein MIC2	0.397792	0.326869	-1.32992	-1.61321
TGGT1_240740	Sec1 family protein	1.18577	0.323984	0.245821	-1.626
TGGT1_216880	guanine nucleotide-binding protein	1.06979	0.321373	0.0973334	-1.63768
TGGT1_240280	S1/P1nuclease	0.881333	0.319108	-0.182241	-1.64788
TGGT1_268570	zinc finger (CCCH type) motif-containing protein	1.02852	0.317971	0.0405746	-1.65303
TGGT1_285230	PRP38 family protein	0.929802	0.313311	-0.105004	-1.67433
TGGT1_254120	putative autophagy-related protein 8 atg8	0.720153	0.313208	-0.473625	-1.67481
TGGT1_277850	trypsin domain-containing protein	1.15302	0.312943	0.205423	-1.67603
TGGT1_218070	hypothetical protein	1.27269	0.312574	0.347884	-1.67773
TGGT1_247350	thioredoxin domain-containing protein	0.821013	0.309821	-0.284523	-1.69049
TGGT1_285680	putative dihydrolipoamide acyltransferase	0.915673	0.307166	-0.127095	-1.70291
TGGT1_289760	hypothetical protein	0.597083	0.305276	-0.743996	-1.71182
TGGT1_236520	hypothetical protein	0.922392	0.304904	-0.116547	-1.71357
TGGT1_244200	putative 2-oxoglutarate dehydrogenase e1 component, mitochondrial precursor	0.640741	0.304318	-0.642187	-1.71635
TGGT1_307810	hypothetical protein	1.11034	0.304292	0.151001	-1.71647
TGGT1_211020	RNA recognition motif-containing protein	0.744848	0.30428	-0.424981	-1.71653
TGGT1_291930	RNA recognition motif-containing protein	0.724669	0.304147	-0.464606	-1.71716
TGGT1_306400	hypothetical protein	0.407323	0.304048	-1.29576	-1.71763
TGGT1_218560	acetyl-coA carboxylase ACC2	1.14789	0.303119	0.198984	-1.72205
TGGT1_298970	LSM3, U6 small nuclear RNA associated isoform 2 family protein	0.699257	0.301788	-0.516104	-1.72839
TGGT1_262935	hypothetical protein	0.724121	0.300355	-0.465698	-1.73526
TGGT1_239260	histone H4	0.742101	0.299594	-0.430313	-1.73892
TGGT1_318160	MSP (Major sperm protein) domain-containing protein	0.922352	0.298453	-0.116611	-1.74443
TGGT1_225940	hypothetical protein	0.765856	0.297466	-0.384856	-1.7492
TGGT1_270360	hypothetical protein	0.576248	0.296792	-0.795238	-1.75247
TGGT1_262620	RNA recognition motif-containing protein	0.769098	0.290097	-0.378761	-1.78539
TGGT1_211710	TB2/DP1, HVA22 family protein	0.782221	0.28816	-0.354352	-1.79506
TGGT1_207990	ribosomal RNA large subunit methyltransferase J protein	1.00635	0.287203	0.00912993	-1.79986
TGGT1_211680	protein disulfide isomerase	0.461849	0.286589	-1.11451	-1.80295
TGGT1_312110	apicoplast-associated thioredoxin family protein Atrx1	0.671849	0.283269	-0.57379	-1.81976
TGGT1_260370	AtPH1 family protein	1.36254	0.281966	0.446299	-1.82641
TGGT1_222952	phosphohistidine phosphatase	0.777748	0.275256	-0.362625	-1.86115
TGGT1_300260	threonyl-tRNA synthetase family protein	0.943833	0.273548	-0.0833961	-1.87013
TGGT1_208560	carrier superfamily protein	0.838344	0.272244	-0.254386	-1.87703
TGGT1_319870	ubiquitin-conjugating enzyme subfamily protein	0.67367	0.272107	-0.569886	-1.87776
TGGT1_206590	calcium-dependent protein kinase CDPK2A	0.719685	0.271203	-0.474563	-1.88255
TGGT1_319920	2-oxo acid dehydrogenases acyltransferase (catalytic domain) domain-containing protein	0.612956	0.268923	-0.706146	-1.89474
TGGT1_251810	putative translation initiation factor eIF-5A	0.775548	0.265604	-0.366712	-1.91265
TGGT1_226580	hypothetical protein	1.05761	0.265166	0.0808064	-1.91503
TGGT1_262690	ribosomal protein RPL27	0.92698	0.264036	-0.10939	-1.92119
TGGT1_294710	RNA recognition motif-containing protein	1.08116	0.263959	0.112582	-1.92162
TGGT1_256050	signal recognition particle 14kd protein	0.78045	0.262992	-0.357623	-1.92691
TGGT1_411470	putative transmembrane protein	0.857875	0.262913	-0.22116	-1.92734
TGGT1_251630	slc30a2 protein	0.730535	0.26188	-0.452975	-1.93302
TGGT1_306970	thymidylate kinase	1.30663	0.259401	0.385854	-1.94674
TGGT1_306650	hypothetical protein	0.767389	0.25823	-0.381971	-1.95327
TGGT1_248250	putative translation initiation factor IF-2	0.992919	0.257849	-0.0102517	-1.9554
TGGT1_247550	heat shock protein HSP60	0.792164	0.250707	-0.336129	-1.99593
TGGT1_233140	putative deoxyuridine 5'-triphosphate nucleotidohydrolase	0.901497	0.245045	-0.149605	-2.02888
TGGT1_205540	DEAD/DEAH box helicase domain-containing protein	1.11414	0.244719	0.155928	-2.0308
TGGT1_290600	succinyl-CoA-synthetase alpha SCSA	0.848357	0.243998	-0.237257	-2.03506
TGGT1_297960B	rhoptry neck protein RON6	0.928465	0.24394	-0.10708	-2.0354
TGGT1_238070	glutaredoxin domain-containing protein	0.788369	0.24263	-0.343057	-2.04317
TGGT1_230520	putative cyclophilin 1	0.774615	0.236751	-0.368448	-2.07855
TGGT1_201120	ELMO/CED-12 family protein	0.793088	0.235804	-0.334447	-2.08434
TGGT1_201400	Sin3-associated polypeptide SAP18	0.804692	0.234361	-0.313491	-2.09319
TGGT1_245620	ribosomal-ubiquitin protein RPS27A	0.864066	0.234254	-0.210786	-2.09386
TGGT1_251680	putative histamine-releasing factor	0.741903	0.231746	-0.430698	-2.10939
TGGT1_262960	putative U1 snRNP-associated protein Usp106	0.276026	0.227545	-1.85712	-2.13578
TGGT1_265530	RNA recognition motif-containing protein	0.815989	0.226578	-0.293379	-2.14192
TGGT1_217540	RNA recognition motif-containing protein	0.829382	0.214426	-0.269892	-2.22145
TGGT1_270240	MAG1 protein	0.681814	0.213612	-0.552549	-2.22693
TGGT1_310670	putative glycogen phosphorylase 1	1.08669	0.213484	0.119935	-2.2278
TGGT1_225080	ribosomal protein RPS18	0.95534	0.206564	-0.0659143	-2.27534
TGGT1_245470	mitotic checkpoint protein, BUB3 family protein	0.443968	0.206469	-1.17147	-2.27601
TGGT1_310640	phosphorylase family protein	0.676557	0.202076	-0.563717	-2.30703
TGGT1_227600	ribosomal protein RPL34	0.975576	0.201583	-0.0356745	-2.31055
TGGT1_242380	fatty acid elongase	0.22053	0.196143	-2.18095	-2.35002
TGGT1_293310	putative ribosomal protein L20	1.01609	0.194324	0.0230249	-2.36346
TGGT1_205180	RNA recognition motif-containing protein	1.89292	0.194298	0.920615	-2.36365
TGGT1_236130	signal recognition particle (SRP9) domain-containing protein	0.387108	0.190557	-1.36919	-2.39171
TGGT1_283510	hypothetical protein	0.967144	0.188816	-0.0481978	-2.40494	IAP1
TGGT1_280518	hypothetical protein	0.903085	0.187727	-0.147067	-2.41329
TGGT1_229420	putative cytochrome c	0.793594	0.183925	-0.333527	-2.44281
TGGT1_299210	CTP synthase	0.969653	0.183687	-0.0444597	-2.44468
TGGT1_205700	cyclophilin precursor	0.57161	0.183551	-0.806898	-2.44575
TGGT1_254330	lipase	0.558796	0.182847	-0.839605	-2.45129
TGGT1_234610	WD-40 repeat protein	0.993494	0.18009	-0.00941639	-2.47321
TGGT1_259240	ribosomal protein RPS21	0.867165	0.17983	-0.205621	-2.47529
TGGT1_208530	nicotinate phosphoribosyltransferase	0.933012	0.177962	-0.100032	-2.49036
TGGT1_293510	poly(ADP-ribose) polymerase and DNA-Ligase Zn-finger region domain-containing protein	0.366922	0.174865	-1.44646	-2.51568
TGGT1_309210	putative peroxiredoxin 6	0.937371	0.174462	-0.0933084	-2.51901
TGGT1_236540	RNA recognition motif-containing protein	0.719693	0.173185	-0.474546	-2.52962
TGGT1_268890	citrate synthase I	0.766481	0.170316	-0.383678	-2.55371
TGGT1_273090	cell division protein CDC48CY	0.947852	0.168587	-0.0772666	-2.56843
TGGT1_205558	NAC domain-containing protein	1.07234	0.167954	0.100769	-2.57386
TGGT1_288530	NOL1/NOP2/sun family protein	0.531645	0.167228	-0.911466	-2.58011
TGGT1_232250	catalase	0.84581	0.165873	-0.241594	-2.59185
TGGT1_410370	putative transmembrane protein	1.53984	0.158533	0.622779	-2.65715
TGGT1_313640	hypothetical protein	0.808072	0.156205	-0.307444	-2.67849
TGGT1_318230	phosphoglycerate kinase PGKI	0.712373	0.156093	-0.489296	-2.67952
TGGT1_280380	poly(ADP-ribose) glycohydrolase	0.8095	0.150989	-0.304897	-2.72749
TGGT1_314750	hypothetical protein	0.975586	0.150531	-0.0356595	-2.73187
TGGT1_215610	hypothetical protein	0.817907	0.143953	-0.289992	-2.79633
TGGT1_310030	putative cyclase-associated protein	0.608123	0.143752	-0.717565	-2.79834
TGGT1_205250	rhoptry protein ROP18	0.276018	0.135886	-1.85717	-2.87953
TGGT1_312390	hypothetical protein	0.891022	0.133477	-0.166468	-2.90534
TGGT1_211290	rhoptry protein ROP15	1.47367	0.131938	0.559409	-2.92207
TGGT1_232230	ribosomal protein RPL30	0.976726	0.130093	-0.0339746	-2.94239
TGGT1_305050	putative calmodulin	0.82679	0.129517	-0.274407	-2.94879
TGGT1_319530	splicing factor SF2	0.844894	0.125033	-0.243157	-2.99962
TGGT1_223855	RNA recognition motif-containing protein	1.00811	0.123268	0.0116538	-3.02013
TGGT1_202870	SAP domain-containing protein	0.680412	0.11847	-0.555521	-3.07741
TGGT1_306380	U1 zinc finger protein	0.72311	0.116897	-0.467713	-3.09669
TGGT1_289550	WD domain, G-beta repeat-containing protein	1.16498	0.112007	0.220311	-3.15834
TGGT1_263180	myosin D	0.875584	0.111538	-0.191682	-3.16439
TGGT1_216650	S15 sporozoite-expressed protein, Msc1a	0.616988	0.111291	-0.696685	-3.16759	Msc1a
TGGT1_258940	acylphosphatase family protein	0.736379	0.105228	-0.44148	-3.24841
TGGT1_240860	acyltransferase domain-containing protein	0.166446	0.104953	-2.58687	-3.25218
TGGT1_249780	hypothetical protein	0.584686	0.103298	-0.774265	-3.27511
TGGT1_261520	putative nucleolar GTP-binding protein 1	2.95089	0.0946506	1.56115	-3.40124
TGGT1_290040	putative macrophage migration inhibitory factor	0.685218	0.0931208	-0.545365	-3.42475
TGGT1_219200	DEAD/DEAH box RNA helicase family protein	1.21625	0.087166	0.28244	-3.52009
TGGT1_286450	dense granule protein GRA5	0.100845	0.0833473	-3.30979	-3.58472
TGGT1_235540	putative eukaryotic initiation factor-2 beta	0.611963	0.0729359	-0.708484	-3.77723
TGGT1_319560	microneme protein MIC3	0.52076	0.0642459	-0.941311	-3.96025
TGGT1_264610	RNA recognition motif-containing protein	0.649719	0.0603031	-0.622111	-4.05162
TGGT1_240600	putative chaperonin cpn60	0.715064	0.0499787	-0.483856	-4.32254
TGGT1_201710	WD domain, G-beta repeat-containing protein	1.27899	0.0455503	0.355005	-4.4564
TGGT1_309730	thioredoxin reductase	0.805038	0.0417088	-0.312871	-4.5835

## Sheet: common>2
Accession	Description	Abundance Ratio: (MyoJ-1+ Biotin) / (KU+Biotin)	Abundance Ratio: (MyoJ-2+Biotin) / (KU+Biotin)	log2 (ratio S1)	log2 (ratio S2)	Name
TGGT1_275350	TBC domain-containing protein	1000	1000	9.96578	9.96578
TGGT1_245560	hypothetical protein	1000	1000	9.96578	9.96578				known basal pole protein
TGGT1_202550	NLI interacting factor family phosphatase	1000	1000	9.96578	9.96578	BCC6
TGGT1_269885B	rhoptry metalloprotease toxolysin TLN1	1000	1000	9.96578	9.96578				bait
TGGT1_288600	WD domain, G-beta repeat-containing protein	1000	1000	9.96578	9.96578
TGGT1_206300	hypothetical protein	1000	1000	9.96578	9.96578				IMC proteins
TGGT1_247260	hypothetical protein	1000	1000	9.96578	9.96578
TGGT1_252510	hypothetical protein	1000	1000	9.96578	9.96578				investigated candidates
TGGT1_300120	aminotransferase, class V superfamily protein	1000	1000	9.96578	9.96578
TGGT1_278975	ICE family protease (caspase) p20 domain-containing protein	1000	1000	9.96578	9.96578				ratio >2 or log2(ratio)>1
TGGT1_224530	alveolin domain containing intermediate filament IMC5	1000	1000	9.96578	9.96578	IMC5
TGGT1_244380	cactin	1000	1000	9.96578	9.96578
TGGT1_273050	hypothetical protein	1000	1000	9.96578	9.96578	BCC8
TGGT1_226220	alveolin domain containing intermediate filament IMC9	1000	1000	9.96578	9.96578	IMC9
TGGT1_224520	alveolin domain containing intermediate filament IMC8	1000	1000	9.96578	9.96578	IMC8
TGGT1_278130	hypothetical protein	1000	1000	9.96578	9.96578	BCC11
TGGT1_229280	hypothetical protein	1000	1000	9.96578	9.96578
TGGT1_218720	calcium-dependent protein kinase CDPK6	1000	1000	9.96578	9.96578	CDPK6
TGGT1_247770	hypothetical protein	1000	1000	9.96578	9.96578
TGGT1_223420	DnaJ domain-containing protein	1000	1000	9.96578	9.96578
TGGT1_313100	signal recognition particle SRP54 protein	1000	1000	9.96578	9.96578
TGGT1_226790	ABC transporter, ATP-binding domain-containing protein	1000	1000	9.96578	9.96578
TGGT1_215380	hypothetical protein	1000	1000	9.96578	9.96578	C1
TGGT1_209850	RNA recognition motif-containing protein	1000	1000	9.96578	9.96578
TGGT1_236850	hypothetical protein	1000	1000	9.96578	9.96578
TGGT1_261500	hydrolase	1000	1000	9.96578	9.96578
TGGT1_285220	CAP-Gly domain-containing protein	1000	1000	9.96578	9.96578
TGGT1_233010	putative cell-cycle-assocaited protein kinase ERK7	1000	1000	9.96578	9.96578	ERK7
TGGT1_219190	nuclear movement protein domain containing protein	1000	1000	9.96578	9.96578
TGGT1_231480	putative GCN1	1000	1000	9.96578	9.96578
TGGT1_250730	putative 60S ribosomal protein L7-B	1000	1000	9.96578	9.96578
TGGT1_221390	hypothetical protein	1000	1000	9.96578	9.96578
TGGT1_294640	ribonucleoside-diphosphate reductase large chain	1000	1000	9.96578	9.96578
TGGT1_227450	hydrolase, NUDIX family protein	1000	1000	9.96578	9.96578
TGGT1_264030	putative aminotransferase	1000	1000	9.96578	9.96578
TGGT1_202300	putative inosine triphosphate pyrophosphatase	1000	1000	9.96578	9.96578
TGGT1_206690	glideosome-associated protein with multiple-membrane spans GAPM2B	1000	1000	9.96578	9.96578	GAPM2B
TGGT1_254400	putative LSU ribosomal protein L2P	1000	1000	9.96578	9.96578
TGGT1_284620	hypothetical protein	1000	1000	9.96578	9.96578
TGGT1_270960	hypothetical protein	1000	1000	9.96578	9.96578
TGGT1_216900	cytokine induced apoptosis inhibitor 1 family protein	1000	1000	9.96578	9.96578
TGGT1_291820	RNA helicase (UPF2 interacting domain) protein	1000	1000	9.96578	9.96578
TGGT1_255880	hypothetical protein	1000	1000	9.96578	9.96578
TGGT1_244420	hypothetical protein	1000	1000	9.96578	9.96578
TGGT1_289540	hypothetical protein	1000	1000	9.96578	9.96578
TGGT1_257470	myosin J	692.214	922.413	9.43507	9.84927	MyoJ
TGGT1_232780	hypothetical protein	269.313	619.714	8.07314	9.27546	BCC1
TGGT1_310440	membrane occupation and recognition nexus protein MORN1	74.3925	180.023	6.21709	7.49204	MORN1
TGGT1_269460	Ser/Thr phosphatase family protein	27.1903	86.4839	4.76502	6.43436	BCC5
TGGT1_230340	hypothetical protein	27.7545	70.2862	4.79465	6.13517
TGGT1_311230	hypothetical protein	23.249	61.5712	4.5391	5.94418	BCC7
TGGT1_233680	nuclear movement family protein	38.1233	46.6999	5.2526	5.54535
TGGT1_231070	protein kinase	13.9667	36.9153	3.80392	5.20615	BCC2
TGGT1_250340	centrin 2	75.8781	30.4822	6.24561	4.92989	CEN2
TGGT1_310220	hypothetical protein	16.3637	26.89	4.03243	4.749	BCC10
TGGT1_272640	putative eukaryotic initiation factor-2B, epsilon subunit	20.6371	25.203	4.36717	4.65553
TGGT1_268630	YagE family protein	27.4409	24.7306	4.77826	4.62822
TGGT1_293180	NADP-specific glutamate dehydrogenase	18.5855	22.2153	4.21611	4.47348
TGGT1_209420	hypothetical protein	26.2389	20.2651	4.71363	4.34093	C2
TGGT1_244840	zinc knuckle domain-containing protein	6.01138	17.2365	2.5877	4.10739
TGGT1_205320	hypothetical protein	12.1525	16.8288	3.60318	4.07286
TGGT1_216810	5'-nucleotidase, C-terminal domain-containing protein	13.8825	14.4446	3.79519	3.85246
TGGT1_273905	hypothetical protein	8.03661	11.2988	3.00659	3.4981	C3
TGGT1_315920	DNA-directed RNA polymerase II RPB11A	17.8582	10.8582	4.15851	3.44072
TGGT1_288800	endonuclease/exonuclease/phosphatase family protein	9.74349	10.0938	3.28444	3.3354
TGGT1_260320	Noc2p family protein	16.0262	9.57664	4.00236	3.25952
TGGT1_283850	peptidyl-prolyl cis-trans isomerase	6.63622	9.52679	2.73036	3.25199
TGGT1_242830	putative XRN 5'-3' exonuclease	12.1417	9.11118	3.6019	3.18764
TGGT1_205130	hypothetical protein	6.21358	8.60093	2.63542	3.10449
TGGT1_253470	alveolin domain containing intermediate filament IMC13	5.96002	8.55227	2.57532	3.09631	IMC13
TGGT1_296010	phosphatidylinositol 3- and 4-kinase	8.48876	8.02858	3.08555	3.00515
TGGT1_321620	dynamin-related protein DRPB	8.34692	8.00102	3.06124	3.00018	DRPB
TGGT1_270250	dense granule protein GRA1	2.39065	7.68157	1.2574	2.9414	GRA1
TGGT1_229650	josephin protein	6.7953	6.91722	2.76454	2.79019
TGGT1_267500	hypothetical protein	6.98866	6.66039	2.80502	2.73561	CBAP/SIP
TGGT1_214180	ENTH domain-containing protein	10.4825	6.64361	3.38991	2.73197
TGGT1_214240	bromodomain-containing protein	2.03358	6.5581	1.02402	2.71328
TGGT1_220270	alveolin domain containing intermediate filament IMC6	8.64549	6.33019	3.11195	2.66225	IMC6
TGGT1_207060	ribonucleoside-diphosphate reductase small subunit	7.20831	5.98107	2.84966	2.5804
TGGT1_301120	acetyl-CoA acetyltransferase	2.60698	5.96263	1.38238	2.57595
TGGT1_313670	adaptin n terminal region domain-containing protein	5.00137	5.64367	2.32232	2.49663
TGGT1_235340	hypothetical protein	11.0804	5.62664	3.46993	2.49227
TGGT1_230850	hypothetical protein	4.79018	5.56305	2.26008	2.47588
TGGT1_291180	hypothetical protein	9.59735	5.28723	3.26264	2.40251
TGGT1_260540	alveolin domain containing intermediate filament IMC14	4.64572	4.7847	2.2159	2.25843	IMC14
TGGT1_233720	DNA-directed RNA polymerase II RPBABC8	6.12186	4.70801	2.61397	2.23512
TGGT1_314100	tetratricopeptide repeat-containing protein	3.30114	4.5713	1.72296	2.1926
TGGT1_267050	hydrolase, alpha/beta fold family protein	4.4586	4.54264	2.15659	2.18353
TGGT1_232340	protein phosphatase 2C domain-containing protein	9.20426	4.43977	3.2023	2.15048
TGGT1_230210	alveolin domain containing intermediate filament IMC10	6.45052	4.21902	2.68942	2.07691	IMC10
TGGT1_277260	hypothetical protein	3.21843	4.14704	1.68636	2.05208
TGGT1_221570	putative pre-rRNA-processing protein	2.4586	4.12892	1.29784	2.04576
TGGT1_214270	putative translation initiation factor IF-2	4.66922	3.99429	2.22318	1.99794
TGGT1_200460	hypothetical protein	2.96427	3.6836	1.56768	1.88112
TGGT1_289600	heat shock protein HSP29	4.43549	3.66351	2.14909	1.87323	HSP29
TGGT1_225790	PDI family protein	2.83102	3.34175	1.50132	1.7406
TGGT1_260600	Pumilio-family RNA binding repeat-containing protein	3.38355	3.21187	1.75854	1.68341
TGGT1_262940	putative aspartyl proteinase (eimepsin)	3.87893	3.15772	1.95566	1.65888
TGGT1_258410	photosensitized INA-labeled protein PHIL1	2.25646	3.10244	1.17406	1.6334	PHIL1
TGGT1_256760	pyruvate kinase PyK1	2.05283	2.99167	1.03761	1.58095
TGGT1_233020	Not1 N-terminal domain, CCR4-Not complex component protein	3.19386	2.9413	1.6753	1.55646
TGGT1_216050	tetratricopeptide repeat-containing protein	2.81654	2.93564	1.49392	1.55367
TGGT1_238190	DNA-directed RNA polymerase II RPB3	3.76097	2.92616	1.91111	1.54901
TGGT1_265830	phosphodiesterase/alkaline phosphatase D family protein	2.73477	2.66561	1.45142	1.41446
TGGT1_291140	CCR4-Not complex component, Not1 protein	2.48953	2.64307	1.31587	1.40221
TGGT1_280370	hypothetical protein	3.05992	2.58666	1.61349	1.37109
TGGT1_205380	fructose-bisphospatase I	2.32206	2.58335	1.2154	1.36924
TGGT1_257290	RNA 2'-phosphotransferase, Tpt1/KptA family protein	2.19677	2.53167	1.13538	1.34009
TGGT1_262640	Cg8 family protein	2.20496	2.48939	1.14075	1.31579
TGGT1_230940	hypothetical protein	2.23793	2.47741	1.16216	1.30884
TGGT1_269180	MIF4G domain-containing protein	2.9298	2.349	1.5508	1.23205
TGGT1_271970	glideosome-associated protein with multiple-membrane spans GAPM3	2.20227	2.23682	1.13899	1.16145	GAPM3
TGGT1_231630	alveolin domain containing intermediate filament IMC4	3.09163	2.06401	1.62837	1.04545
TGGT1_312600	heat shock protein HSP21	2.66314	2.00975	1.41313	1.00702	HSP21
