# Supplementary material for: Identification of new components of the basal pole of Toxoplasma gondii provides novel insights into its molecular organization and functions
Source: Front Cell Infect Microbiol. 2022 Oct 13;12:1010038. doi: 10.3389/fcimb.2022.1010038 (PMC9613666; doi:10.3389/fcimb.2022.1010038)
Supplement: Supplementary file 3 [file Table_2.xlsx]

## Sheet: ortho-ID
Name of the candidate	HOG	OG	Gene Tree Parent Clade	Toxoplasma gondii ME49	Neospora caninum LIV	Hammondia hammondi HH34	Sarcocystis neurona SN3	Cryptosporidium hominis TU502	Cryptosporidium meleagridis UKMEL1	Cryptosporidium muris RN66	Cryptosporidium parvum IowaII	Cyclospora cayetanensis CHN	Cystoisospora suis WienI	Eimeria tenella Houghton	Eimeria brunetti Houghton	Eimeria falciformis Bayer Haberkorn 1970	Eimeria maxima Weybridge	Eimeria mitis Houghton	Eimeria necatrix Houghton	Eimeria praecox Houghton	Plasmodium falciparum 3D7	Plasmodium berghei ANKA	Theileria annulata Ankara	Theileria equi WA	Theileria orientalis Shintoku	Theileria parva Muguga	Babesia bigemina BOND	Babesia bovis T2Bo	Babesia microti RI	Gregarina niphandrodes	Chromera velia CCMP2878
C1	N0.HOG0047676	OG0030915	n0	TGME49_215380	NCLIV_052300	HHA_215380	SN3_00102010
C2	N0.HOG0026853	OG0010295	n0	TGME49_209420	NCLIV_003700	HHA_209420	SN3_01300590					cyc_01982	CSUI_000927	ETH_00021155	EBH_0016930	EfaB_MINUS_12534.g1106	EMWEY_00017890	EMH_0008580	ENH_00082580	EPH_0050460
C3	N0.HOG0012792	OG0001214	n41	TGME49_273905	NCLIV_033830	HHA_273905	SN3_00201805	Chro.20225	CmeUKMEL1_16660	CMU_036950	cgd2_2080	cyc_05852	CSUI_007156	ETH_00020650	EBH_0051850	EfaB_PLUS_3469.g372		EMH_0040040	ENH_00034190		PF3D7_0410600	PBANKA_1008000	TA13300, TA13295	BEWA_021960	TOT_020000448	TP02_0461	BBBOND_0309840	BBOV_III004880	BmR1_04g09505	GNI_054630	Cvel_10559
CDPK6	N0.HOG0000602	OG0000005	n382	TGME49_218720	NCLIV_061660	HHA_218720	SN3_02900045	Chro.40377	CmeUKMEL1_07940	CMU_018480	cgd4_3330	cyc_04408, cyc_00380	CSUI_006563, CSUI_002319	ETH_00010685	EBH_0036600	EfaB_PLUS_20371.g1645.t2-p1, EfaB_PLUS_20371.g1645.t3-p1, EfaB_PLUS_20371.g1645, EfaB_PLUS_13227.g1128	EMWEY_00053310, EMWEY_00027720	EMH_0053620, EMH_0099990	ENH_00041490	EPH_0028400	PF3D7_1122800	PBANKA_0925500								GNI_109220, GNI_081840, GNI_164140	Cvel_19268, Cvel_14661, Cvel_13661, Cvel_23050, Cvel_20540, Cvel_9761, Cvel_20818, Cvel_5127, Cvel_1548, Cvel_122
BCC1	N0.HOG0026249	OG0009727	n0	TGME49_232780	NCLIV_032730	HHA_232780	SN3_01500735					cyc_03369	CSUI_004980	ETH_00017280	EBH_0069890	EfaB_MINUS_6743.g595	EMWEY_00024550	EMH_0087250	ENH_00054630	EPH_0051810
BCC2	N0.HOG0016563	OG0002582	n0	TGME49_231070	NCLIV_031430	HHA_231070	SN3_00102225	Chro.20247, Chro.10319	CmeUKMEL1_16775, CmeUKMEL1_01125	CMU_037190, CMU_029660	cgd2_2310, cgd1_2850	cyc_04434	CSUI_006532	ETH_00017160	EBH_0005100	EfaB_PLUS_56725.g2793	EMWEY_00005160	EMH_0027580	ENH_00075120	EPH_0005900	PF3D7_0926100	PBANKA_0826900	TA03800	BEWA_015070	TOT_030000550	TP03_0296	BBBOND_0400240	BBOV_IV007830	BMR1_03g02831	GNI_016610, GNI_148530
BCC5	N0.HOG0002328	OG0000037	n641	TGME49_269460	NCLIV_036950	HHA_269460						cyc_07137	CSUI_002264	ETH_00036350		EfaB_PLUS_15576.g1304
BCC6	N0.HOG0003815	OG0000084	n69	TGME49_202550	NCLIV_022380	HHA_202550						cyc_01736	CSUI_000261	ETH_00036835	EBH_0057860	EfaB_MINUS_1425.g192	EMWEY_00051710	EMH_0041380, EMH_0041390	ENH_00000670								BBBOND_0100930	BBOV_III011240	BmR1_04g07990		Cvel_14584
BCC7	N0.HOG0025694	OG0009216	n0	TGME49_311230	NCLIV_055160	HHA_311230	SN3_02900055					cyc_06771	CSUI_000905	ETH_00019155	EBH_0042640	EfaB_MINUS_18869.g1678, EfaB_MINUS_18869.g1678.t2-p1	EMWEY_00007550	EMH_0089010	ENH_00066190	EPH_0034690
BCC8	N0.HOG0047237	OG0030476	n0	TGME49_273050	NCLIV_034500	HHA_273050							CSUI_003827
BCC10	N0.HOG0007052	OG0000298	n129	TGME49_310220	NCLIV_054320	HHA_310220	SN3_00501165					cyc_06656, cyc_05222	CSUI_000690	ETH_00008495	EBH_0037000	EfaB_PLUS_11414.g992, EfaB_PLUS_11414.g992.t2-p1	EMWEY_00015890	EMH_0080240, EMH_0080350	ENH_00080270	EPH_0016860
BCC11	N0.HOG0042554	OG0025796	n0	TGME49_278130	NCLIV_067860	HHA_278130	SN3_00300220						CSUI_000811
IMC5	N0.HOG0015890	OG0002306	n0	TGME49_224530	NCLIV_048170	HHA_224530	SN3_00102755	Chro.40372	CmeUKMEL1_07915	CMU_018430	cgd4_3290	cyc_01546	CSUI_004656	ETH_00000450	EBH_0054320	EfaB_PLUS_43533.g2633	EMWEY_00060480	EMH_0029950	ENH_00063760	EPH_0042980	PF3D7_1003600	PBANKA_1202000	TA09355	BEWA_004190	TOT_040000736	TP04_0163	BBBOND_0204530	BBOV_II004030	BMR1_01G00555	GNI_081670
IMC8	N0.HOG0027538	OG0010940	n0	TGME49_224520	NCLIV_048180	HHA_224520	SN3_00102750					cyc_01545	CSUI_004655	ETH_00000445	EBH_0054310	EfaB_PLUS_23210.g1930	EMWEY_00056620		ENH_00063750	EPH_0042990
IMC9	N0.HOG0029167	OG0012505	n0	TGME49_226220	NCLIV_046720	HHA_226220						cyc_07250	CSUI_001626	ETH_00033210		EfaB_PLUS_15745.g1367	EMWEY_00034590	EMH_0055510	ENH_00043550
IMC13	N0.HOG0021815	OG0005836	n0	TGME49_253470	NCLIV_007900	HHA_253470		Chro.50439	CmeUKMEL1_15810	CMU_042330	cgd5_4080	cyc_00463	CSUI_001175	ETH_00043075		EfaB_MINUS_20412.g1814			ENH_00052880		PF3D7_1417000	PBANKA_1025700									Cvel_16344
MORN1	N0.HOG0018359	OG0003432	n0	TGME49_310440	NCLIV_054520	HHA_310440	SN3_01500125	Chro.60298	CmeUKMEL1_13070	CMU_007260	cgd6_2570	cyc_07473	CSUI_011133	ETH_00011310		EfaB_PLUS_25398.g2085			ENH_00061000		PF3D7_1031200	PBANKA_0515200	TA19180	BEWA_033160	TOT_010000145	TP01_0158	BBBOND_0402530	BBOV_IV001320	BMR1_02g00290	GNI_067670	Cvel_32330
MyoJ	N0.HOG0001834	OG0000027	n156	TGME49_257470	NCLIV_068980	HHA_257470		Chro.80089	CmeUKMEL1_17535	CMU_024610	cgd8_710						EMWEY_00060250, EMWEY_00060210				PF3D7_1229800	PBANKA_1444500									Cvel_17296
CEN2	N0.HOG0001053	OG0000011	n557	TGME49_250340	NCLIV_066190	HHA_250340	SN3_00401480	Chro.80151	CmeUKMEL1_15415	CMU_025210	cgd8_1280	cyc_06435	CSUI_007002	ETH_00008760	EBH_0086740	EfaB_PLUS_56725.g2854	EMWEY_00015230			EPH_0032650	PF3D7_1446600	PBANKA_1310400	TA17720	BEWA_053360	TOT_030000222	TP03_0609	BBBOND_0303380	BBOV_III001910	BmR1_04g05445	GNI_056700	Cvel_12505
MyoI	N0.HOG0001850	OG0000027	n535	TGME49_230980	NCLIV_0313	HHA_230980		Chro.60497	CmeUKMEL1_05210	CMU_020420-t26	cgd6_4340		CSUI_003244																	GNI_152210	Cvel_18609

## Sheet: ortho-noID
Name of the candidate	HOG	OG	Gene Tree Parent Clade	Toxoplasma gondii ME49	Neospora caninum LIV	Hammondia hammondi HH34	Besnoitia besnoiti	Cystoisospora suis WienI	Sarcocystis neurona SN3	Cryptosporidium hominis TU502	Cryptosporidium meleagridis UKMEL1	Cryptosporidium muris RN66	Cryptosporidium parvum IowaII	Cyclospora cayetanensis CHN	Eimeria tenella Houghton	Eimeria brunetti Houghton	Eimeria falciformis Bayer Haberkorn 1970	Eimeria maxima Weybridge	Eimeria mitis Houghton	Eimeria necatrix Houghton	Eimeria praecox Houghton	Plasmodium falciparum 3D7	Plasmodium berghei ANKA	Theileria annulata Ankara	Theileria equi WA	Theileria orientalis Shintoku	Theileria parva Muguga	Babesia bigemina BOND	Babesia bovis T2Bo	Babesia microti RI	Gregarina niphandrodes	Chromera velia CCMP2878
C1	N0.HOG0047676	OG0030915	n0	●	●	●	●		●
C2	N0.HOG0026853	OG0010295	n0	●	●	●	●	●	●					●	●	●	●	●	●	●	●
C3	N0.HOG0012792	OG0001214	n41	●	●	●	●	●	●	●	●	●	●	●	●	●	●		●	●		●	●	●	●	●	●	●	●	●	●	●
CDPK6	N0.HOG0000602	OG0000005	n382	●	●	●	●	●	●	●	●	●	●	●	●	●	●	●	●	●	●	●	●								●	●
BCC1	N0.HOG0026249	OG0009727	n0	●	●	●	●	●	●					●	●	●	●	●	●	●	●
BCC2	N0.HOG0016563	OG0002582	n0	●	●	●	●	●	●	●	●	●	●	●	●	●	●	●	●	●	●	●	●	●	●	●	●	●	●	●	●
BCC5	N0.HOG0002328	OG0000037	n641	●	●	●	●	●						●	●		●
BCC6	N0.HOG0003815	OG0000084	n69	●	●	●	●	●						●	●	●	●	●	●	●								●	●	●		●
BCC7	N0.HOG0025694	OG0009216	n0	●	●	●	●	●	●					●	●	●	●	●	●	●	●
BCC8	N0.HOG0047237	OG0030476	n0	●	●	●	●	●
BCC10	N0.HOG0007052	OG0000298	n129	●	●	●	●	●	●					●	●	●	●	●	●	●	●
BCC11	N0.HOG0042554	OG0025796	n0	●	●	●	●	●	●
IMC5	N0.HOG0015890	OG0002306	n0	●	●	●	●	●	●	●	●	●	●	●	●	●	●	●	●	●	●	●	●	●	●	●	●	●	●	●	●
IMC8	N0.HOG0027538	OG0010940	n0	●	●	●	●	●	●					●	●	●	●	●		●	●
IMC9	N0.HOG0029167	OG0012505	n0	●	●	●	●	●						●	●		●	●	●	●
IMC13	N0.HOG0021815	OG0005836	n0	●	●	●	●	●		●	●	●	●	●	●		●			●		●	●									●
MORN1	N0.HOG0018359	OG0003432	n0	●	●	●	●	●	●	●	●	●	●	●	●		●			●		●	●	●	●	●	●	●	●	●	●	●
MyoJ	N0.HOG0001834	OG0000027	n156	●	●	●	●			●	●	●	●					●				●	●									●
CEN2	N0.HOG0001053	OG0000011	n557	●	●	●	●	●	●	●	●	●	●	●	●	●	●	●			●	●	●	●	●	●	●	●	●	●	●	●
MyoI	N0.HOG0001850	OG0000027	n535	●	●	●	●	●		●	●	●	●																		●	●
